# Supplementary material for: Proteomic profiling identifies miR-423-5p as a modulator of oncogenic metabolism in HCC
Source: Springer Nature journal article supplement (doi:10.1186/s12967-025-07039-4), 2025-09-24
Supplement: MOESM4 [file 12967_2025_7039_MOESM4_ESM.xlsx]

## Sheet: DEPs_log2FC=|0.6|&AdjPval<0.05
ENSEMBL geneID	Majority.protein.IDs	Protein.Ids	Regulation status	Protein.Names	Gene.names	ENTERZ ID	First.Protein.Description	quantified	logFC_Mir__vs__pLKO	AveExpr_Mir__vs__pLKO	t_Mir__vs__pLKO	P.Value_Mir__vs__pLKO	adj.P.Val_Mir__vs__pLKO
ENSG00000169213	P20337	P20337	UPREGULATED	RAB3B_HUMAN	RAB3B	5865	Ras-related protein Rab-3B	+	3.2483	4.92826	12.8202	5.74559e-08	7.52496e-07
ENSG00000147394	O15231	O15231	UPREGULATED	ZN185_HUMAN	ZNF185	7739	Zinc finger protein 185	+	3.10765	4.1654	16.1906	4.94679e-09	1.06683e-07
ENSG00000064300	P08138	P08138	UPREGULATED	TNR16_HUMAN	NGFR	4804	Tumor necrosis factor receptor superfamily member 16	+	3.01441	4.26329	17.9306	1.66781e-09	4.45966e-08
ENSG00000110811	Q8IVL6	Q8IVL6	UPREGULATED	P3H3_HUMAN	P3H3	10536	Prolyl 3-hydroxylase 3	+	2.85923	4.33839	13.1857	4.28925e-08	6.03315e-07
ENSG00000196352	P08174	P08174	UPREGULATED	DAF_HUMAN	CD55	1604	Complement decay-accelerating factor	+	2.66548	4.76063	7.61713	1.0248e-05	5.56165e-05
ENSG00000118640	Q9BV40	Q9BV40	UPREGULATED	VAMP8_HUMAN	VAMP8	8673	Vesicle-associated membrane protein 8	+	2.64061	4.31251	9.9057	7.98397e-07	6.48571e-06
ENSG00000107159	Q16790	Q16790	UPREGULATED	CAH9_HUMAN	CA9	768	Carbonic anhydrase 9	+	2.54582	6.20768	16.9169	3.10266e-09	7.5137e-08
#N/A	Q16526;Q49AN0	Q16526;Q49AN0	UPREGULATED	CRY1_HUMAN;CRY2_HUMAN	CRY1;CRY2	#N/A	Cryptochrome-1	+	2.49009	4.96745	2.75807	0.0185862	0.0375675
ENSG00000134769	Q9Y4J8	O60941;Q9Y4J8	UPREGULATED	DTNA_HUMAN	DTNA	1837	Dystrobrevin alpha	+	2.4214	4.22429	10.5477	4.24695e-07	3.92155e-06
ENSG00000154127	Q8TF42	Q8TF42	UPREGULATED	UBS3B_HUMAN	UBASH3B	84959	Ubiquitin-associated and SH3 domain-containing protein B	+	2.4175	3.92578	5.72336	0.000132395	0.000505742
ENSG00000169715	P04732	P04732;P04733;P07438;Q93083	UPREGULATED	MT1E_HUMAN	MT1E	4493	Metallothionein-1E	+	2.32916	4.27206	9.32428	1.45635e-06	1.08048e-05
ENSG00000118960	Q53T59	Q53T59	UPREGULATED	H1BP3_HUMAN	HS1BP3	64342	HCLS1-binding protein 3	+	2.31268	4.22105	14.3366	1.78701e-08	2.93115e-07
ENSG00000172260	Q7Z3B1	Q7Z3B1	UPREGULATED	NEGR1_HUMAN	NEGR1	257194	Neuronal growth regulator 1	+	2.29044	4.19241	10.8256	3.26384e-07	3.17961e-06
#N/A	O95716;P20337	O95716;P20337;Q96E17	UPREGULATED	RAB3B_HUMAN;RAB3D_HUMAN	RAB3B;RAB3D	#N/A	Ras-related protein Rab-3D	+	2.28434	4.20056	9.68394	1.00067e-06	7.81952e-06
ENSG00000138735	O76074	O76074	UPREGULATED	PDE5A_HUMAN	PDE5A	8654	cGMP-specific 3',5'-cyclic phosphodiesterase	+	2.25938	4.21817	12.8351	5.67659e-08	7.4536e-07
#N/A	Q12792;Q6IBS0	Q12792;Q6IBS0	UPREGULATED	TWF1_HUMAN;TWF2_HUMAN	TWF1;TWF2	#N/A	Twinfilin-1	+	2.25609	3.95408	4.44644	0.000979268	0.00290275
ENSG00000167600	Q96SQ9	Q96SQ9	UPREGULATED	CP2S1_HUMAN	CYP2S1	29785	Cytochrome P450 2S1	+	2.25458	4.30971	6.46295	4.61146e-05	0.000203395
ENSG00000016864	Q68CQ7	Q68CQ7	UPREGULATED	GL8D1_HUMAN	GLT8D1	55830	Glycosyltransferase 8 domain-containing protein 1	+	2.25017	3.84385	9.38875	1.36046e-06	1.02137e-05
ENSG00000167397	Q9BQB6	Q9BQB6	UPREGULATED	VKOR1_HUMAN	VKORC1	79001	Vitamin K epoxide reductase complex subunit 1	+	2.24724	4.37194	5.75588	0.000126196	0.000486402
ENSG00000128567	O00592	O00592	UPREGULATED	PODXL_HUMAN	PODXL	5420	Podocalyxin	+	2.21783	6.24135	5.58572	0.000162457	0.000603513
ENSG00000134825	P61165	P61165	UPREGULATED	TM258_HUMAN	TMEM258	746	Transmembrane protein 258	+	2.16138	4.37778	6.44913	4.70006e-05	0.000206417
ENSG00000204219	O75764	O75764	UPREGULATED	TCEA3_HUMAN	TCEA3	6920	Transcription elongation factor A protein 3	+	2.12252	4.17821	10.2345	5.75497e-07	4.95739e-06
ENSG00000070540	Q5MNZ9	Q5MNZ9	UPREGULATED	WIPI1_HUMAN	WIPI1	55062	WD repeat domain phosphoinositide-interacting protein 1	+	2.0533	4.23083	6.47429	4.54006e-05	0.000200937
ENSG00000213145	P50238	P50238	UPREGULATED	CRIP1_HUMAN	CRIP1	1396	Cysteine-rich protein 1	+	2.02582	5.20063	4.72142	0.000624281	0.00195074
ENSG00000111348	P52566	P52566	UPREGULATED	GDIR2_HUMAN	ARHGDIB	397	Rho GDP-dissociation inhibitor 2	+	2.00855	6.32278	22.807	1.25486e-10	6.57392e-09
ENSG00000134294	Q96QD8	Q96QD8	UPREGULATED	S38A2_HUMAN	SLC38A2	54407	Sodium-coupled neutral amino acid symporter 2	+	2.00447	4.76332	5.28051	0.000258189	0.000893826
ENSG00000189221	P21397	P21397	UPREGULATED	AOFA_HUMAN	MAOA	4128	Amine oxidase [flavin-containing] A	+	2.00151	4.01866	7.10872	1.948e-05	9.57035e-05
ENSG00000165434	Q6PCE3	Q6PCE3	UPREGULATED	PGM2L_HUMAN	PGM2L1	283209	Glucose 1,6-bisphosphate synthase	+	1.95035	5.21571	4.51069	0.000880677	0.00264254
ENSG00000196586	Q9UM54	Q9UM54	UPREGULATED	MYO6_HUMAN	MYO6	4646	Unconventional myosin-VI	+	1.94028	4.4489	6.68083	3.4275e-05	0.000158244
ENSG00000162976	Q8N755	Q8N755	UPREGULATED	S66A3_HUMAN	SLC66A3	130814	Solute carrier family 66 member 3	+	1.93356	4.15633	5.32899	0.00023966	0.000841821
ENSG00000197594	P22413	P22413	UPREGULATED	ENPP1_HUMAN	ENPP1	5167	Ectonucleotide pyrophosphatase/phosphodiesterase family member 1	+	1.93139	4.01606	5.3064	0.000248115	0.00086478
ENSG00000146242	Q13641	Q13641	UPREGULATED	TPBG_HUMAN	TPBG	7162	Trophoblast glycoprotein	+	1.91415	3.90314	10.9899	2.80058e-07	2.81373e-06
ENSG00000165983	Q96BW5	Q96BW5	UPREGULATED	PTER_HUMAN	PTER	9317	Phosphotriesterase-related protein	+	1.9021	3.8699	7.27436	1.57485e-05	7.98339e-05
ENSG00000185585	Q68BL7	Q68BL7	UPREGULATED	OLM2A_HUMAN	OLFML2A	169611	Olfactomedin-like protein 2A	+	1.89488	4.35843	5.11666	0.00033291	0.00111783
ENSG00000154556	O94875	O94875	UPREGULATED	SRBS2_HUMAN	SORBS2	8470	Sorbin and SH3 domain-containing protein 2	+	1.8622	4.44841	3.13551	0.00946047	0.0209806
ENSG00000147955	Q99720	Q99720	UPREGULATED	SGMR1_HUMAN	SIGMAR1	10280	Sigma non-opioid intracellular receptor 1	+	1.85845	4.30674	4.22423	0.00141939	0.00400391
ENSG00000106772	Q8WUY3	Q8WUY3	UPREGULATED	PRUN2_HUMAN	PRUNE2	158471	Protein prune homolog 2	+	1.85643	3.95922	7.66379	9.67601e-06	5.31844e-05
ENSG00000220205	P63027	P63027	UPREGULATED	VAMP2_HUMAN	VAMP2	6844	Vesicle-associated membrane protein 2	+	1.84317	3.62038	3.82865	0.00279003	0.00724381
ENSG00000164171	P17301	P17301	UPREGULATED	ITA2_HUMAN	ITGA2	3673	Integrin alpha-2	+	1.8376	7.92157	66.0439	1.11907e-15	2.87265e-12
ENSG00000197535	Q9Y4I1	Q9Y4I1	UPREGULATED	MYO5A_HUMAN	MYO5A	4644	Unconventional myosin-Va	+	1.79775	4.35529	8.05133	6.06227e-06	3.60499e-05
ENSG00000138356	Q06278	Q06278	UPREGULATED	AOXA_HUMAN	AOX1	316	Aldehyde oxidase	+	1.79174	4.16314	5.74876	0.000127526	0.000490424
ENSG00000149269	Q13153	Q13153	UPREGULATED	PAK1_HUMAN	PAK1	5058	Serine/threonine-protein kinase PAK 1	+	1.78276	4.53971	3.24349	0.00780421	0.0177759
ENSG00000100439	Q8TB40	Q8TB40	UPREGULATED	ABHD4_HUMAN	ABHD4	63874	(Lyso)-N-acylphosphatidylethanolamine lipase	+	1.78126	3.47815	3.0426	0.0111686	0.0242451
ENSG00000125148	P02795	P02795;P04732;P13640;P80297;Q8N339	UPREGULATED	MT2_HUMAN	MT2A	4502	Metallothionein-2	+	1.78083	8.95333	9.70691	9.77351e-07	7.69589e-06
ENSG00000132470	P16144	P16144	UPREGULATED	ITB4_HUMAN	ITGB4	3691	Integrin beta-4	+	1.77164	3.92444	6.13555	7.28797e-05	0.000299773
ENSG00000151693	O43150	O43150	UPREGULATED	ASAP2_HUMAN	ASAP2	8853	Arf-GAP with SH3 domain, ANK repeat and PH domain-containing protein 2	+	1.77003	4.2354	3.67354	0.00365386	0.00919805
ENSG00000165912	Q9UKS6	Q9UKS6	UPREGULATED	PACN3_HUMAN	PACSIN3	29763	Protein kinase C and casein kinase substrate in neurons protein 3	+	1.76317	3.87569	5.75794	0.000125814	0.000485659
ENSG00000187688	Q9Y5S1	Q9Y5S1	UPREGULATED	TRPV2_HUMAN	TRPV2	51393	Transient receptor potential cation channel subfamily V member 2	+	1.73772	5.76584	14.9128	1.18041e-08	2.09696e-07
ENSG00000081177	Q9NVH0	Q9NVH0	UPREGULATED	EXD2_HUMAN	EXD2	55218	Exonuclease 3'-5' domain-containing protein 2	+	1.73218	3.63694	5.02881	0.000382111	0.00125915
ENSG00000165476	Q6NUK4	Q6NUK4	UPREGULATED	REEP3_HUMAN	REEP3	221035	Receptor expression-enhancing protein 3	+	1.72647	3.95427	3.39548	0.00595881	0.0140979
ENSG00000137133	Q9BX68	Q9BX68	UPREGULATED	HINT2_HUMAN	HINT2	84681	Adenosine 5'-monophosphoramidase HINT2	+	1.72511	4.72961	2.87728	0.0150139	0.0312323
ENSG00000120217	Q9NZQ7	Q9NZQ7	UPREGULATED	PD1L1_HUMAN	CD274	29126	Programmed cell death 1 ligand 1	+	1.69139	3.72225	6.09689	7.69999e-05	0.000314743
ENSG00000154511	Q5T7M9	Q5T7M9	UPREGULATED	DIK1A_HUMAN	DIPK1A	388650	Divergent protein kinase domain 1A	+	1.66693	4.27848	3.30183	0.00703526	0.0163032
ENSG00000059804	P11169	P11169;Q8TDB8	UPREGULATED	GTR3_HUMAN	SLC2A3	6515	Solute carrier family 2, facilitated glucose transporter member 3	+	1.6588	4.38161	5.08007	0.000352536	0.00117198
ENSG00000142192	P05067	P05067	UPREGULATED	A4_HUMAN	APP	351	Amyloid-beta precursor protein	+	1.65653	3.71184	7.38262	1.37295e-05	7.15605e-05
ENSG00000135905	Q96BY6	Q96BY6	UPREGULATED	DOC10_HUMAN	DOCK10	55619	Dedicator of cytokinesis protein 10	+	1.65553	4.34023	4.42227	0.0010193	0.00300753
ENSG00000162694	Q9UBQ6	Q9UBQ6	UPREGULATED	EXTL2_HUMAN	EXTL2	2135	Exostosin-like 2	+	1.65467	4.15144	4.94819	0.000434057	0.0014113
ENSG00000166902	Q9NX20	Q9NX20	UPREGULATED	RM16_HUMAN	MRPL16	54948	Large ribosomal subunit protein uL16m	+	1.64835	3.29054	2.75579	0.0186621	0.0376716
ENSG00000206075	P36952	P36952	UPREGULATED	SPB5_HUMAN	SERPINB5	5268	Serpin B5	+	1.63936	4.10697	5.70056	0.000136935	0.000521093
ENSG00000135318	P21589	P21589	UPREGULATED	5NTD_HUMAN	NT5E	4907	5'-nucleotidase	+	1.62817	9.27154	83.6972	8.25706e-17	4.23917e-13
ENSG00000174032	Q5SVS4	Q5SVS4	UPREGULATED	KMCP1_HUMAN	SLC25A30	253512	Kidney mitochondrial carrier protein 1	+	1.61907	3.90371	6.67567	3.45143e-05	0.000158921
ENSG00000107554	Q6XZF7	Q6XZF7	UPREGULATED	DNMBP_HUMAN	DNMBP	23268	Dynamin-binding protein	+	1.60836	4.55804	2.80994	0.0169381	0.0346869
ENSG00000106080	Q9NWM8	Q9NWM8	UPREGULATED	FKB14_HUMAN	FKBP14	55033	Peptidyl-prolyl cis-trans isomerase FKBP14	+	1.59761	5.18542	3.28812	0.00720874	0.016641
ENSG00000106976	Q05193	Q05193	UPREGULATED	DYN1_HUMAN	DNM1	1759	Dynamin-1	+	1.58933	4.2834	4.22666	0.0014136	0.00399417
#N/A	Q6ZT62;Q9Y3L3	Q6ZT62;Q9Y3L3	UPREGULATED	3BP1_HUMAN;BGIN_HUMAN	BARGIN;SH3BP1	#N/A	Bargin	+	1.57256	3.56261	4.19974	0.00147922	0.00415216
ENSG00000108784	P54802	P54802	UPREGULATED	ANAG_HUMAN	NAGLU	4669	Alpha-N-acetylglucosaminidase	+	1.56547	4.17172	5.06855	0.000358963	0.00118821
ENSG00000105404	Q9UI14	Q9UI14	UPREGULATED	PRAF1_HUMAN	RABAC1	10567	Prenylated Rab acceptor protein 1	+	1.54833	4.94562	5.39091	0.000218021	0.000775154
ENSG00000112759	Q99808	Q99808	UPREGULATED	S29A1_HUMAN	SLC29A1	2030	Equilibrative nucleoside transporter 1	+	1.5278	3.87477	3.13442	0.00947896	0.0210125
ENSG00000189143	O14493	O14493;O15551;O95484;P56747	UPREGULATED	CLD4_HUMAN	CLDN4	1364	Claudin-4	+	1.51096	4.75504	3.01919	0.0116461	0.0251012
ENSG00000100348	Q99757	Q99757	UPREGULATED	THIOM_HUMAN	TXN2	25828	Thioredoxin, mitochondrial	+	1.49874	4.14814	3.37096	0.00622331	0.0146226
ENSG00000198910	P32004	P32004	UPREGULATED	L1CAM_HUMAN	L1CAM	3897	Neural cell adhesion molecule L1	+	1.49438	7.79649	43.6969	1.04527e-13	7.66632e-11
ENSG00000197467	Q5TAT6	Q5TAT6	UPREGULATED	CODA1_HUMAN	COL13A1	1305	Collagen alpha-1(XIII) chain	+	1.4913	3.71923	6.46403	4.60459e-05	0.000203267
ENSG00000102743	Q9Y619	Q9Y619	UPREGULATED	ORNT1_HUMAN	SLC25A15	10166	Mitochondrial ornithine transporter 1	+	1.48836	3.74126	5.13175	0.000325152	0.0010968
ENSG00000141696	Q92791	Q92791	UPREGULATED	SC65_HUMAN	P3H4	10609	Endoplasmic reticulum protein SC65	+	1.48771	4.54707	2.68043	0.0213555	0.042299
ENSG00000164897	Q9BVT8	Q9BVT8	UPREGULATED	TMUB1_HUMAN	TMUB1	83590	Transmembrane and ubiquitin-like domain-containing protein 1	+	1.48523	4.01716	3.44845	0.00542607	0.0129932
ENSG00000137752	P29466	P29466	UPREGULATED	CASP1_HUMAN	CASP1	834	Caspase-1	+	1.48523	4.49652	3.78602	0.00300399	0.00772915
ENSG00000114268	Q16877	Q16877	UPREGULATED	F264_HUMAN	PFKFB4	5210	6-phosphofructo-2-kinase/fructose-2,6-bisphosphatase 4	+	1.46491	3.33751	4.13289	0.00165636	0.00458672
ENSG00000137216	Q5T3F8	Q5T3F8	UPREGULATED	CSCL2_HUMAN	TMEM63B	55362	CSC1-like protein 2	+	1.46333	3.87419	4.20983	0.00145427	0.00409332
ENSG00000143369	Q16610	Q16610	UPREGULATED	ECM1_HUMAN	ECM1	1893	Extracellular matrix protein 1	+	1.46266	4.15446	6.27851	5.95722e-05	0.000252937
ENSG00000136141	Q9Y2L9	Q9Y2L9	UPREGULATED	LRCH1_HUMAN	LRCH1	23143	Leucine-rich repeat and calponin homology domain-containing protein 1	+	1.45201	4.18911	3.25341	0.00766769	0.0175193
ENSG00000144136	Q8WUM9	Q8WUM9	UPREGULATED	S20A1_HUMAN	SLC20A1	6574	Sodium-dependent phosphate transporter 1	+	1.44713	3.4834	3.97107	0.00218287	0.00583691
#N/A	H7BZ55;P16949;Q93045	P16949;Q93045;Q9H169;Q9NZ72;H7BZ55	UPREGULATED	CRCC2_HUMAN;STMN1_HUMAN;STMN2_HUMAN	CROCC2;STMN1;STMN2	#N/A	Ciliary rootlet coiled-coil protein 2	+	1.44178	4.03198	3.55435	0.00450251	0.0109929
ENSG00000168477	P22105	P22105	UPREGULATED	TENX_HUMAN	TNXB	7148	Tenascin-X	+	1.43819	5.23787	3.28986	0.00718647	0.016612
ENSG00000011009	O95372	O95372	UPREGULATED	LYPA2_HUMAN	LYPLA2	11313	Acyl-protein thioesterase 2	+	1.43721	5.22483	3.14011	0.00938319	0.0208542
#N/A	O95302;Q96AY3	O95302;Q96AY3	UPREGULATED	FKB10_HUMAN;FKBP9_HUMAN	FKBP10;FKBP9	#N/A	Peptidyl-prolyl cis-trans isomerase FKBP9	+	1.43351	4.87841	3.38227	0.00609984	0.0143852
ENSG00000170458	P08571	P08571	UPREGULATED	CD14_HUMAN	CD14	929	Monocyte differentiation antigen CD14	+	1.42977	4.18448	8.38914	4.08685e-06	2.57763e-05
ENSG00000152558	Q8N131	Q8N131	UPREGULATED	PORIM_HUMAN	TMEM123	114908	Porimin	+	1.42433	4.15789	2.72053	0.0198774	0.0397393
ENSG00000133935	Q9UKR5	Q9UKR5	UPREGULATED	ERG28_HUMAN	ERG28	11161	Ergosterol biosynthetic protein 28 homolog	+	1.41964	4.61557	3.5053	0.00490834	0.0118978
ENSG00000161888	Q8NBT2	Q8NBT2	UPREGULATED	SPC24_HUMAN	SPC24	147841	Kinetochore protein Spc24	+	1.41456	3.60091	4.45124	0.000971523	0.00288312
ENSG00000137221	Q5JTD0	Q5JTD0	UPREGULATED	TJAP1_HUMAN	TJAP1	93643	Tight junction-associated protein 1	+	1.4142	3.76423	3.12547	0.00963154	0.0213047
ENSG00000189077	Q9BXJ8	Q9BXJ8	UPREGULATED	TACAN_HUMAN	TMEM120A	83862	Ion channel TACAN	+	1.4011	4.00975	5.33846	0.000236211	0.00083176
ENSG00000105514	O95716	O95716;P20336	UPREGULATED	RAB3D_HUMAN	RAB3D	9545	Ras-related protein Rab-3D	+	1.39874	4.57393	3.18924	0.00859597	0.0193221
ENSG00000143398	Q99755	O14986;O60331;Q99755	UPREGULATED	PI51A_HUMAN	PIP5K1A	8394	Phosphatidylinositol 4-phosphate 5-kinase type-1 alpha	+	1.39419	3.57907	4.76823	0.000578817	0.0018231
ENSG00000100938	Q9P2T1	Q9P2T1	UPREGULATED	GMPR2_HUMAN	GMPR2	51292	GMP reductase 2	+	1.39179	4.67019	5.93475	9.71921e-05	0.000383834
ENSG00000157637	Q9HBR0	Q9HBR0	UPREGULATED	S38AA_HUMAN	SLC38A10	124565	Putative sodium-coupled neutral amino acid transporter 10	+	1.38719	4.94838	3.78877	0.00298971	0.00770541
ENSG00000070081	P80303	P80303	UPREGULATED	NUCB2_HUMAN	NUCB2	4925	Nucleobindin-2	+	1.38389	4.62639	3.19815	0.0084605	0.0190928
ENSG00000175334	O75531	O75531	UPREGULATED	BAF_HUMAN	BANF1	8815	Barrier-to-autointegration factor	+	1.37452	4.31109	3.87035	0.00259601	0.0067861
ENSG00000176438	Q6ZMZ3	Q6ZMZ3	UPREGULATED	SYNE3_HUMAN	SYNE3	161176	Nesprin-3	+	1.36253	4.06325	4.95571	0.000428911	0.001399
ENSG00000088387	Q9BZ29	Q9BZ29;Q5JSL3	UPREGULATED	DOCK9_HUMAN	DOCK9	23348	Dedicator of cytokinesis protein 9	+	1.36187	4.17823	4.91934	0.000454411	0.00147126
ENSG00000105612	O00115	O00115	UPREGULATED	DNS2A_HUMAN	DNASE2	1777	Deoxyribonuclease-2-alpha	+	1.35628	3.96816	3.65062	0.00380323	0.00951085
ENSG00000163297	P58335	P58335	UPREGULATED	ANTR2_HUMAN	ANTXR2	118429	Anthrax toxin receptor 2	+	1.3533	4.89683	6.55729	4.0524e-05	0.000182821
ENSG00000198805	P00491	P00491	UPREGULATED	PNPH_HUMAN	PNP	4860	Purine nucleoside phosphorylase	+	1.35248	6.31474	29.0904	8.93915e-12	1.1229e-09
ENSG00000119922	P09913	P09913	UPREGULATED	IFIT2_HUMAN	IFIT2	3433	Interferon-induced protein with tetratricopeptide repeats 2	+	1.35203	3.48491	3.44999	0.0054114	0.0129733
ENSG00000076067	Q15434	Q15434	UPREGULATED	RBMS2_HUMAN	RBMS2	5939	RNA-binding motif, single-stranded-interacting protein 2	+	1.35013	3.96596	4.29703	0.00125599	0.00359634
ENSG00000101000	Q9UNN8	Q9UNN8	UPREGULATED	EPCR_HUMAN	PROCR	10544	Endothelial protein C receptor	+	1.34429	7.70928	31.7228	3.47598e-12	6.86373e-10
ENSG00000198399	Q9NZM3	Q9NZM3	UPREGULATED	ITSN2_HUMAN	ITSN2	50618	Intersectin-2	+	1.33982	4.37179	3.42177	0.00568803	0.0135196
#N/A	Q8IXS6	Q8IXS6	UPREGULATED	PALM2_HUMAN	PALM2	#N/A	Paralemmin-2	+	1.33839	4.37056	3.68861	0.00355896	0.00898756
#N/A	P60709;Q562R1	P60709;P62736;P63261;P63267;P68032;P68133;Q562R1	UPREGULATED	ACTBL_HUMAN;ACTB_HUMAN	ACTB;ACTBL2	#N/A	Actin, cytoplasmic 1	+	1.33643	3.63786	2.9918	0.012231	0.0261728
ENSG00000141469	Q13336	Q13336	UPREGULATED	UT1_HUMAN	SLC14A1	6563	Urea transporter 1	+	1.33614	3.73417	4.07894	0.00181538	0.00496282
ENSG00000133121	Q9Y3M8	Q9Y3M8	UPREGULATED	STA13_HUMAN	STARD13	90627	StAR-related lipid transfer protein 13	+	1.33029	3.78967	4.55572	0.000817828	0.00248152
#N/A	P58335;Q9H6X2	P58335;Q9H6X2	UPREGULATED	ANTR1_HUMAN;ANTR2_HUMAN	ANTXR1;ANTXR2	#N/A	Anthrax toxin receptor 2	+	1.32977	4.9917	2.96056	0.0129343	0.0274625
ENSG00000140945	P55290	P55290	UPREGULATED	CAD13_HUMAN	CDH13	1012	Cadherin-13	+	1.3271	7.08109	24.0197	7.16267e-11	4.59664e-09
ENSG00000100417	Q92871	Q92871	UPREGULATED	PMM1_HUMAN	PMM1	5372	Phosphomannomutase 1	+	1.32638	3.85572	10.8624	3.15318e-07	3.10719e-06
ENSG00000111906	Q7Z4H3	Q7Z4H3	UPREGULATED	HDDC2_HUMAN	HDDC2	51020	5'-deoxynucleotidase HDDC2	+	1.3232	3.92272	4.55847	0.000814146	0.00247181
ENSG00000049323	Q14766	Q14766	UPREGULATED	LTBP1_HUMAN	LTBP1	4052	Latent-transforming growth factor beta-binding protein 1	+	1.31424	3.82608	5.36117	0.000228144	0.000807231
#N/A	O00291;O75146	O00291;O75146	UPREGULATED	HIP1R_HUMAN;HIP1_HUMAN	HIP1;HIP1R	#N/A	Huntingtin-interacting protein 1	+	1.31404	4.64593	4.51536	0.000873939	0.00262386
ENSG00000133114	Q8IXQ4	Q8IXQ4	UPREGULATED	GPAM1_HUMAN	GPALPP1	55425	GPALPP motifs-containing protein 1	+	1.30394	3.82791	2.91035	0.0141506	0.0296165
ENSG00000066427	P54252	P54252	UPREGULATED	ATX3_HUMAN	ATXN3	4287	Ataxin-3	+	1.29609	4.05807	3.00736	0.0118952	0.0255737
ENSG00000090339	P05362	P05362	UPREGULATED	ICAM1_HUMAN	ICAM1	3383	Intercellular adhesion molecule 1	+	1.29273	6.11205	22.9031	1.19908e-10	6.41259e-09
ENSG00000213949	P56199	P56199	UPREGULATED	ITA1_HUMAN	ITGA1	3672	Integrin alpha-1	+	1.28154	5.26173	8.72209	2.80293e-06	1.8449e-05
ENSG00000151500	Q9P016	Q9P016	UPREGULATED	THYN1_HUMAN	THYN1	29087	Thymocyte nuclear protein 1	+	1.28126	4.41337	2.71352	0.0201283	0.0401784
#N/A	Q9NR46;Q9Y371	Q9NR46;Q9Y371	UPREGULATED	SHLB1_HUMAN;SHLB2_HUMAN	SH3GLB1;SH3GLB2	#N/A	Endophilin-B2	+	1.25752	4.37626	4.24849	0.0013626	0.00387137
ENSG00000137960	Q8TF65	Q8TF65	UPREGULATED	GIPC2_HUMAN	GIPC2	54810	PDZ domain-containing protein GIPC2	+	1.24881	3.51043	3.2003	0.0084281	0.0190362
ENSG00000107789	Q9UNW1	Q9UNW1	UPREGULATED	MINP1_HUMAN	MINPP1	9562	Multiple inositol polyphosphate phosphatase 1	+	1.24744	4.68102	2.80959	0.0169487	0.0346949
ENSG00000102871	Q15628	Q15628	UPREGULATED	TRADD_HUMAN	TRADD	8717	Tumor necrosis factor receptor type 1-associated DEATH domain protein	+	1.23457	3.9323	3.5565	0.00448555	0.0109713
ENSG00000085117	P27701	P27701	UPREGULATED	CD82_HUMAN	CD82	3732	CD82 antigen	+	1.22569	4.99406	13.9803	2.32716e-08	3.61648e-07
ENSG00000134871	P08572	P08572	UPREGULATED	CO4A2_HUMAN	COL4A2	1284	Collagen alpha-2(IV) chain	+	1.22286	5.08629	3.05003	0.0110212	0.0239556
ENSG00000122705	P09496	P09496	UPREGULATED	CLCA_HUMAN	CLTA	1211	Clathrin light chain A	+	1.21639	5.46749	3.05652	0.0108941	0.0237093
ENSG00000135636	O75923	O75923	UPREGULATED	DYSF_HUMAN	DYSF	8291	Dysferlin	+	1.21607	3.97595	4.05741	0.00188322	0.005121
ENSG00000169908	P30408	P30408	UPREGULATED	T4S1_HUMAN	TM4SF1	4071	Transmembrane 4 L6 family member 1	+	1.2126	4.00185	3.96115	0.00222035	0.0059217
ENSG00000104783	O15554	O15554	UPREGULATED	KCNN4_HUMAN	KCNN4	3783	Intermediate conductance calcium-activated potassium channel protein 4	+	1.18019	3.56884	5.15719	0.000312514	0.00106184
#N/A	Q9BWM7;Q9H9B4	Q9BWM7;Q9H9B4	UPREGULATED	SFXN1_HUMAN;SFXN3_HUMAN	SFXN1;SFXN3	#N/A	Sideroflexin-3	+	1.17191	4.24185	2.75948	0.0185393	0.0375023
ENSG00000124191	Q96NM4	Q96NM4	UPREGULATED	TOX2_HUMAN	TOX2	84969	TOX high mobility group box family member 2	+	1.17128	3.19548	2.94359	0.0133332	0.028193
ENSG00000197713	Q96AT9	Q96AT9	UPREGULATED	RPE_HUMAN	RPE	6120	Ribulose-phosphate 3-epimerase	+	1.15833	4.49666	3.19387	0.00852533	0.0192222
ENSG00000153250	P29558	P29558	UPREGULATED	RBMS1_HUMAN	RBMS1	5937	RNA-binding motif, single-stranded-interacting protein 1	+	1.15215	5.08493	3.0018	0.0120141	0.0257969
ENSG00000142089	Q01628	P13164;Q01628;Q01629	UPREGULATED	IFM3_HUMAN	IFITM3	10410	Interferon-induced transmembrane protein 3	+	1.14839	6.68179	21.2723	2.66231e-10	1.09759e-08
ENSG00000187608	P05161	P05161	UPREGULATED	ISG15_HUMAN	ISG15	9636	Ubiquitin-like protein ISG15	+	1.14598	5.94942	23.3014	9.95025e-11	5.44967e-09
ENSG00000145730	P19021	P19021	UPREGULATED	AMD_HUMAN	PAM	5066	Peptidyl-glycine alpha-amidating monooxygenase	+	1.13726	3.86268	3.24921	0.00772518	0.0176193
ENSG00000134864	Q9BVM4	Q9BVM4	UPREGULATED	GGACT_HUMAN	GGACT	87769	Gamma-glutamylaminecyclotransferase	+	1.13397	4.48818	2.80764	0.0170078	0.0347881
ENSG00000106266	Q9Y5X2	Q9Y5X2	UPREGULATED	SNX8_HUMAN	SNX8	29886	Sorting nexin-8	+	1.12691	3.99124	3.7677	0.00310108	0.00793666
ENSG00000099219	Q7Z2K6	Q7Z2K6	UPREGULATED	ERMP1_HUMAN	ERMP1	79956	Endoplasmic reticulum metallopeptidase 1	+	1.12431	4.00056	4.38231	0.00108928	0.00318291
ENSG00000131437	Q9Y496	Q9Y496	UPREGULATED	KIF3A_HUMAN	KIF3A	11127	Kinesin-like protein KIF3A	+	1.12323	4.26974	3.62427	0.00398271	0.00987312
ENSG00000132196	P56937	P56937	UPREGULATED	DHB7_HUMAN	HSD17B7	51478	3-keto-steroid reductase/17-beta-hydroxysteroid dehydrogenase 7	+	1.11869	4.89146	3.80109	0.00292647	0.00755379
ENSG00000138639	Q8N264	Q8N264	UPREGULATED	RHG24_HUMAN	ARHGAP24	83478	Rho GTPase-activating protein 24	+	1.11369	3.57585	2.85947	0.0155004	0.0320624
ENSG00000118482	Q92576	Q92576	UPREGULATED	PHF3_HUMAN	PHF3	23469	PHD finger protein 3	+	1.11337	3.48188	3.04007	0.0112192	0.024308
ENSG00000197355	Q3KQV9	Q3KQV9	UPREGULATED	UAP1L_HUMAN	UAP1L1	91373	UDP-N-acetylhexosamine pyrophosphorylase-like protein 1	+	1.11108	3.41181	4.36157	0.00112756	0.00327797
ENSG00000166925	Q9Y3Q8	Q9Y3Q8	UPREGULATED	T22D4_HUMAN	TSC22D4	81628	TSC22 domain family protein 4	+	1.0901	3.45699	2.66043	0.0221329	0.0436033
ENSG00000029639	Q8WVM0	Q8WVM0	UPREGULATED	TFB1M_HUMAN	TFB1M	51106	Dimethyladenosine transferase 1, mitochondrial	+	1.08768	4.00422	3.34711	0.006492	0.0151362
ENSG00000173548	Q8WV41	Q8WV41	UPREGULATED	SNX33_HUMAN	SNX33	257364	Sorting nexin-33	+	1.08334	3.98573	2.95237	0.0131253	0.0278337
ENSG00000214063	O14817	O14817	UPREGULATED	TSN4_HUMAN	TSPAN4	7106	Tetraspanin-4	+	1.08286	3.65991	3.91073	0.00242138	0.00638817
ENSG00000034510	P63313	P63313	UPREGULATED	TYB10_HUMAN	TMSB10	9168	Thymosin beta-10	+	1.07765	4.02549	3.68059	0.00360918	0.00910542
ENSG00000131389	P31641	P31641	UPREGULATED	SC6A6_HUMAN	SLC6A6	6533	Sodium- and chloride-dependent taurine transporter	+	1.07715	5.53968	10.459	4.62507e-07	4.19172e-06
ENSG00000087302	Q9Y224	Q9Y224	UPREGULATED	RTRAF_HUMAN	RTRAF	51637	RNA transcription, translation and transport factor protein	+	1.06932	4.43265	2.76057	0.0185032	0.037444
ENSG00000155368	P07108	P07108	UPREGULATED	ACBP_HUMAN	DBI	1622	Acyl-CoA-binding protein	+	1.06927	5.92115	7.63425	1.00339e-05	5.47441e-05
ENSG00000079156	Q9BZF3	Q9BZF3	UPREGULATED	OSBL6_HUMAN	OSBPL6	114880	Oxysterol-binding protein-related protein 6	+	1.06721	3.5281	5.35637	0.000229823	0.000812051
ENSG00000115271	P28676	P28676	UPREGULATED	GRAN_HUMAN	GCA	25801	Grancalcin	+	1.06413	4.73765	3.62495	0.00397793	0.00986603
ENSG00000033627	Q93050	Q93050	UPREGULATED	VPP1_HUMAN	ATP6V0A1	535	V-type proton ATPase 116 kDa subunit a 1	+	1.06062	4.17488	2.79107	0.01752	0.0356935
ENSG00000135968	Q8IWJ2	Q8IWJ2	UPREGULATED	GCC2_HUMAN	GCC2	9648	GRIP and coiled-coil domain-containing protein 2	+	1.05839	4.01451	3.31875	0.00682711	0.0158599
ENSG00000110171	O75382	O75382	UPREGULATED	TRIM3_HUMAN	TRIM3	10612	Tripartite motif-containing protein 3	+	1.05736	4.01763	3.7077	0.0034424	0.00871863
ENSG00000079931	Q6UVY6	Q6UVY6	UPREGULATED	MOXD1_HUMAN	MOXD1	26002	DBH-like monooxygenase protein 1	+	1.04537	6.24121	16.9968	2.95089e-09	7.18987e-08
ENSG00000089050	O75884	O75884	UPREGULATED	RBBP9_HUMAN	RBBP9	10741	Serine hydrolase RBBP9	+	1.03683	4.24758	3.56851	0.00439186	0.0107575
ENSG00000185567	Q8IVF2	Q8IVF2	UPREGULATED	AHNK2_HUMAN	AHNAK2	113146	Protein AHNAK2	+	1.03583	8.67125	24.0315	7.12453e-11	4.59664e-09
ENSG00000174791	Q13671	Q13671	UPREGULATED	RIN1_HUMAN	RIN1	9610	Ras and Rab interactor 1	+	1.03536	8.04596	24.2852	6.35839e-11	4.29526e-09
ENSG00000165898	Q86U28	Q86U28	UPREGULATED	ISCA2_HUMAN	ISCA2	122961	Iron-sulfur cluster assembly 2 homolog, mitochondrial	+	1.03528	4.55042	2.70233	0.0205353	0.0409112
ENSG00000111912	Q8NI08	Q8NI08	UPREGULATED	NCOA7_HUMAN	NCOA7	135112	Nuclear receptor coactivator 7	+	1.02834	3.59471	2.69919	0.0206509	0.0410937
ENSG00000136542	Q7Z7M9	Q7Z7M9	UPREGULATED	GALT5_HUMAN	GALNT5	11227	Polypeptide N-acetylgalactosaminyltransferase 5	+	1.02791	4.64082	9.60635	1.08402e-06	8.39417e-06
ENSG00000015475	P55957	P55957	UPREGULATED	BID_HUMAN	BID	637	BH3-interacting domain death agonist	+	1.02667	3.80153	6.48378	4.4813e-05	0.000199022
ENSG00000131981	P17931	P17931	UPREGULATED	LEG3_HUMAN	LGALS3	3958	Galectin-3	+	1.02609	7.60071	16.7551	3.4369e-09	8.02047e-08
ENSG00000130304	Q6PCB7	Q6PCB7	UPREGULATED	S27A1_HUMAN	SLC27A1	376497	Long-chain fatty acid transport protein 1	+	1.01717	3.46106	4.82767	0.000526065	0.00167233
ENSG00000148356	Q6UWE0	Q6UWE0	UPREGULATED	LRSM1_HUMAN	LRSAM1	90678	E3 ubiquitin-protein ligase LRSAM1	+	1.01582	3.96004	4.10799	0.00172787	0.00475651
ENSG00000132254	P53365	P53365	UPREGULATED	ARFP2_HUMAN	ARFIP2	23647	Arfaptin-2	+	1.00541	4.52866	2.60573	0.0244043	0.0474826
ENSG00000105887	P58546	P58546	UPREGULATED	MTPN_HUMAN	MTPN	136319	Myotrophin	+	1.00434	6.10045	15.5912	7.37818e-09	1.42404e-07
ENSG00000079462	Q15102	Q15102	UPREGULATED	PA1B3_HUMAN	PAFAH1B3	5050	Platelet-activating factor acetylhydrolase IB subunit alpha1	+	1.00368	7.32842	22.646	1.35476e-10	6.81895e-09
#N/A	Q13424;Q13425	Q13424;Q13425;Q13884	UPREGULATED	SNTA1_HUMAN;SNTB2_HUMAN	SNTA1;SNTB2	#N/A	Alpha-1-syntrophin	+	1.00362	4.38612	2.68209	0.0212922	0.0422212
#N/A	Q13555;Q13557	Q13554;Q13555;Q13557	UPREGULATED	KCC2D_HUMAN;KCC2G_HUMAN	CAMK2D;CAMK2G	#N/A	Calcium/calmodulin-dependent protein kinase type II subunit gamma	+	1.00356	5.77296	3.62556	0.00397373	0.00986514
ENSG00000074416	Q99685	Q99685	UPREGULATED	MGLL_HUMAN	MGLL	11343	Monoglyceride lipase	+	0.999646	4.9662	2.72024	0.019888	0.0397451
ENSG00000213380	Q96MW5	Q96MW5	UPREGULATED	COG8_HUMAN	COG8	84342	Conserved oligomeric Golgi complex subunit 8	+	0.999149	4.76437	2.88606	0.0147798	0.0307952
ENSG00000128340	P15153	P15153	UPREGULATED	RAC2_HUMAN	RAC2	5880	Ras-related C3 botulinum toxin substrate 2	+	0.993954	8.24586	9.20981	1.64508e-06	1.17958e-05
ENSG00000155760	O75084	O75084	UPREGULATED	FZD7_HUMAN	FZD7	8324	Frizzled-7	+	0.979854	4.92938	5.45587	0.000197531	0.000711665
ENSG00000117691	Q9UMX5	Q9UMX5	UPREGULATED	NENF_HUMAN	NENF	29937	Neudesin	+	0.976769	5.37468	2.9873	0.0123299	0.0263537
ENSG00000125375	Q99766	Q99766	UPREGULATED	ATP5S_HUMAN	DMAC2L	27109	ATP synthase subunit s, mitochondrial	+	0.976298	4.26073	2.57733	0.0256729	0.0494577
ENSG00000169919	P08236	P08236	UPREGULATED	BGLR_HUMAN	GUSB	2990	Beta-glucuronidase	+	0.974342	5.52946	19.3949	7.19407e-10	2.3084e-08
ENSG00000148175	P27105	P27105	UPREGULATED	STOM_HUMAN	STOM	2040	Stomatin	+	0.971937	6.4719	18.6408	1.10067e-09	3.21069e-08
ENSG00000174684	O43505	O43505	UPREGULATED	B4GA1_HUMAN	B4GAT1	11041	Beta-1,4-glucuronyltransferase 1	+	0.970307	6.43818	13.9716	2.34241e-08	3.61648e-07
ENSG00000137962	Q52LW3	Q52LW3	UPREGULATED	RHG29_HUMAN	ARHGAP29	9411	Rho GTPase-activating protein 29	+	0.969568	5.60731	10.2855	5.47426e-07	4.77974e-06
ENSG00000154678	Q14123	Q14123	UPREGULATED	PDE1C_HUMAN	PDE1C	5137	Dual specificity calcium/calmodulin-dependent 3',5'-cyclic nucleotide phosphodiesterase 1C	+	0.964459	3.21535	5.2451	0.000272684	0.000939569
ENSG00000119865	Q96F85	Q96F85	UPREGULATED	CNRP1_HUMAN	CNRIP1	25927	CB1 cannabinoid receptor-interacting protein 1	+	0.96333	4.31529	6.97663	2.31353e-05	0.000111215
ENSG00000240972	P14174	P14174	UPREGULATED	MIF_HUMAN	MIF	4282	Macrophage migration inhibitory factor	+	0.962805	10.5507	11.5903	1.62682e-07	1.75833e-06
ENSG00000106524	Q8IV38	Q8IV38	UPREGULATED	ANKY2_HUMAN	ANKMY2	57037	Ankyrin repeat and MYND domain-containing protein 2	+	0.961788	4.16484	3.00814	0.0118785	0.0255486
ENSG00000100815	Q15643	Q15643	UPREGULATED	TRIPB_HUMAN	TRIP11	9321	Thyroid receptor-interacting protein 11	+	0.960934	4.27116	3.40188	0.00589173	0.013965
ENSG00000126522	P04424	P04424	UPREGULATED	ARLY_HUMAN	ASL	435	Argininosuccinate lyase	+	0.958359	7.18693	24.6844	5.32839e-11	3.69675e-09
ENSG00000106789	Q92828	Q92828	UPREGULATED	COR2A_HUMAN	CORO2A	7464	Coronin-2A	+	0.952289	4.32495	2.862	0.0154305	0.0319564
ENSG00000156535	Q6YHK3	Q6YHK3	UPREGULATED	CD109_HUMAN	CD109	135228	CD109 antigen	+	0.950783	5.94732	25.4916	3.75825e-11	2.92346e-09
ENSG00000010704	Q30201	Q30201	UPREGULATED	HFE_HUMAN	HFE	3077	Hereditary hemochromatosis protein	+	0.947142	4.11924	2.6962	0.0207617	0.0412981
ENSG00000129472	Q8WUD1	Q8WUD1	UPREGULATED	RAB2B_HUMAN	RAB2B	84932	Ras-related protein Rab-2B	+	0.942267	3.6859	3.53959	0.00462089	0.0112541
ENSG00000147853	Q9UIJ7	Q9UIJ7	UPREGULATED	KAD3_HUMAN	AK3	50808	GTP:AMP phosphotransferase AK3, mitochondrial	+	0.939961	6.39048	19.7317	5.97979e-10	1.9789e-08
ENSG00000150593	Q53EL6	Q53EL6	UPREGULATED	PDCD4_HUMAN	PDCD4	27250	Programmed cell death protein 4	+	0.939196	5.9767	17.5281	2.12537e-09	5.56718e-08
ENSG00000197077	Q9BY89	Q9BY89	UPREGULATED	K1671_HUMAN	KIAA1671	85379	Uncharacterized protein KIAA1671	+	0.939156	3.54105	3.64802	0.00382054	0.00954485
ENSG00000118777	Q9UNQ0	Q9UNQ0	UPREGULATED	ABCG2_HUMAN	ABCG2	9429	Broad substrate specificity ATP-binding cassette transporter ABCG2	+	0.937493	3.81172	2.59695	0.0247896	0.0480989
ENSG00000118939	P15374	P15374	UPREGULATED	UCHL3_HUMAN	UCHL3	7347	Ubiquitin carboxyl-terminal hydrolase isozyme L3	+	0.935847	6.248	15.8651	6.13556e-09	1.24506e-07
ENSG00000119917	O14879	O14879	UPREGULATED	IFIT3_HUMAN	IFIT3	3437	Interferon-induced protein with tetratricopeptide repeats 3	+	0.931964	3.62038	6.57699	3.9451e-05	0.000178294
ENSG00000049283	Q9H201	Q9H201	UPREGULATED	EPN3_HUMAN	EPN3	55040	Epsin-3	+	0.928915	3.57839	4.40213	0.00105395	0.00309022
ENSG00000112514	O60888	O60888	UPREGULATED	CUTA_HUMAN	CUTA	51596	Protein CutA	+	0.92715	7.36566	15.953	5.7866e-09	1.19899e-07
ENSG00000161544	Q8WWM9	Q8WWM9	UPREGULATED	CYGB_HUMAN	CYGB	114757	Cytoglobin	+	0.926967	7.14927	21.9429	1.90466e-10	8.67488e-09
ENSG00000085063	P13987	P13987	UPREGULATED	CD59_HUMAN	CD59	966	CD59 glycoprotein	+	0.926212	6.47173	6.88261	2.61826e-05	0.000123663
ENSG00000111885	P33908	P33908	UPREGULATED	MA1A1_HUMAN	MAN1A1	4121	Mannosyl-oligosaccharide 1,2-alpha-mannosidase IA	+	0.925543	4.55471	3.44757	0.00543452	0.0130074
ENSG00000033011	Q9BT22	Q9BT22	UPREGULATED	ALG1_HUMAN	ALG1	56052	Chitobiosyldiphosphodolichol beta-mannosyltransferase	+	0.924592	3.8752	2.72268	0.0198012	0.0396025
ENSG00000188677	Q9HBI1	Q9HBI1	UPREGULATED	PARVB_HUMAN	PARVB	29780	Beta-parvin	+	0.92279	4.0545	3.09601	0.0101518	0.0223018
ENSG00000119640	P07311	P07311	UPREGULATED	ACYP1_HUMAN	ACYP1	97	Acylphosphatase-1	+	0.921526	5.71325	14.3895	1.71921e-08	2.85644e-07
ENSG00000197956	P06703	P06703	UPREGULATED	S10A6_HUMAN	S100A6	6277	Protein S100-A6	+	0.919652	8.85902	15.1899	9.72003e-09	1.82126e-07
ENSG00000122861	P00749	P00749	UPREGULATED	UROK_HUMAN	PLAU	5328	Urokinase-type plasminogen activator	+	0.918633	4.19053	2.60408	0.0244763	0.047581
ENSG00000108797	P78357	P78357	UPREGULATED	CNTP1_HUMAN	CNTNAP1	8506	Contactin-associated protein 1	+	0.910545	3.85435	3.8953	0.00248661	0.0065468
ENSG00000123146	P48960	P48960	UPREGULATED	AGRE5_HUMAN	ADGRE5	976	Adhesion G protein-coupled receptor E5	+	0.901361	7.56301	26.3739	2.59724e-11	2.299e-09
ENSG00000183087	Q14393	Q14393	UPREGULATED	GAS6_HUMAN	GAS6	2621	Growth arrest-specific protein 6	+	0.900581	4.5909	2.58974	0.025111	0.0486122
ENSG00000129103	Q8NBJ7	Q8NBJ7	UPREGULATED	SUMF2_HUMAN	SUMF2	25870	Inactive C-alpha-formylglycine-generating enzyme 2	+	0.895829	7.46066	28.0293	1.33972e-11	1.43294e-09
ENSG00000137309	P17096	P17096	UPREGULATED	HMGA1_HUMAN	HMGA1	3159	High mobility group protein HMG-I/HMG-Y	+	0.890561	8.40351	9.62318	1.06532e-06	8.26188e-06
ENSG00000175793	P31947	P31947	UPREGULATED	1433S_HUMAN	SFN	2810	14-3-3 protein sigma	+	0.887291	6.57703	15.9859	5.6614e-09	1.18635e-07
ENSG00000106665	Q9UDT6	Q9UDT6	UPREGULATED	CLIP2_HUMAN	CLIP2	7461	CAP-Gly domain-containing linker protein 2	+	0.885317	4.38216	2.81464	0.0167961	0.0344237
ENSG00000115919	Q16719	Q16719	UPREGULATED	KYNU_HUMAN	KYNU	8942	Kynureninase	+	0.884899	5.91744	13.0036	4.95731e-08	6.73303e-07
ENSG00000105755	O95571	O95571	UPREGULATED	ETHE1_HUMAN	ETHE1	23474	Persulfide dioxygenase ETHE1, mitochondrial	+	0.884444	6.32152	12.1388	1.01115e-07	1.18521e-06
ENSG00000135596	Q8TDZ2	Q8TDZ2	UPREGULATED	MICA1_HUMAN	MICAL1	64780	[F-actin]-monooxygenase MICAL1	+	0.883645	6.07471	19.0438	8.75159e-10	2.72307e-08
ENSG00000100097	P09382	P09382	UPREGULATED	LEG1_HUMAN	LGALS1	3956	Galectin-1	+	0.881991	12.6684	16.8288	3.2799e-09	7.73171e-08
ENSG00000125826	Q9BYM8	Q9BYM8	UPREGULATED	HOIL1_HUMAN	RBCK1	10616	RanBP-type and C3HC4-type zinc finger-containing protein 1	+	0.878259	4.7427	2.76267	0.0184337	0.0373327
ENSG00000135631	Q9BXF6	Q9BXF6	UPREGULATED	RFIP5_HUMAN	RAB11FIP5	26056	Rab11 family-interacting protein 5	+	0.872104	4.93498	3.06074	0.0108123	0.0235713
ENSG00000135842	Q9BZQ8	Q9BZQ8	UPREGULATED	NIBA1_HUMAN	NIBAN1	116496	Protein Niban 1	+	0.870172	6.57858	17.1579	2.66863e-09	6.71604e-08
#N/A	Q14571;Q14573	Q14571;Q14573;Q14643	UPREGULATED	ITPR2_HUMAN;ITPR3_HUMAN	ITPR2;ITPR3	#N/A	Inositol 1,4,5-trisphosphate receptor type 2	+	0.8693	4.25848	3.74205	0.00324252	0.00826158
ENSG00000198959	P21980	P21980;P49221	UPREGULATED	TGM2_HUMAN	TGM2	7052	Protein-glutamine gamma-glutamyltransferase 2	+	0.867888	9.76694	38.9029	3.73488e-13	1.74317e-10
ENSG00000109107	P09972	P09972	UPREGULATED	ALDOC_HUMAN	ALDOC	230	Fructose-bisphosphate aldolase C	+	0.864389	10.2052	26.6778	2.2932e-11	2.14059e-09
ENSG00000106617	Q9UGJ0	Q9UGJ0	UPREGULATED	AAKG2_HUMAN	PRKAG2	51422	5'-AMP-activated protein kinase subunit gamma-2	+	0.860634	2.96834	2.68755	0.0210852	0.0418444
ENSG00000096433	Q14573	Q14573	UPREGULATED	ITPR3_HUMAN	ITPR3	3710	Inositol 1,4,5-trisphosphate receptor type 3	+	0.851952	5.82279	10.4012	4.89104e-07	4.37467e-06
ENSG00000105928	O60443	O60443	UPREGULATED	GSDME_HUMAN	GSDME	1687	Gasdermin-E	+	0.846477	6.97805	17.7667	1.83972e-09	4.89385e-08
ENSG00000116604	Q14814	Q14814	UPREGULATED	MEF2D_HUMAN	MEF2D	4209	Myocyte-specific enhancer factor 2D	+	0.845687	4.00471	2.67979	0.02138	0.0423313
ENSG00000129353	Q8IWA5	Q8IWA5	UPREGULATED	CTL2_HUMAN	SLC44A2	57153	Choline transporter-like protein 2	+	0.839155	4.35105	3.0973	0.0101285	0.0222756
ENSG00000153904	O94760	O94760	UPREGULATED	DDAH1_HUMAN	DDAH1	23576	N(G),N(G)-dimethylarginine dimethylaminohydrolase 1	+	0.832616	6.40402	24.4617	5.87846e-11	4.024e-09
ENSG00000102893	Q93100	Q93100	UPREGULATED	KPBB_HUMAN	PHKB	5257	Phosphorylase b kinase regulatory subunit beta	+	0.831584	3.41508	2.96407	0.0128533	0.0273472
ENSG00000196975	P09525	P09525	UPREGULATED	ANXA4_HUMAN	ANXA4	307	Annexin A4	+	0.827946	7.95143	36.0385	8.62578e-13	2.95232e-10
ENSG00000099194	O00767	O00767	UPREGULATED	SCD_HUMAN	SCD	6319	Stearoyl-CoA desaturase	+	0.826298	7.60744	9.36388	1.39662e-06	1.04371e-05
ENSG00000005243	Q9P299	Q9P299	UPREGULATED	COPZ2_HUMAN	COPZ2	51226	Coatomer subunit zeta-2	+	0.819687	5.02277	3.49919	0.00496151	0.0120018
ENSG00000197930	Q96HE7	Q96HE7	UPREGULATED	ERO1A_HUMAN	ERO1A	30001	ERO1-like protein alpha	+	0.81933	8.33201	29.7602	6.97566e-12	9.67919e-10
ENSG00000173163	Q8N668	Q8N668	UPREGULATED	COMD1_HUMAN	COMMD1	150684	COMM domain-containing protein 1	+	0.81684	3.43135	2.61014	0.0242129	0.0471941
ENSG00000176454	Q643R3	Q643R3	UPREGULATED	LPCT4_HUMAN	LPCAT4	254531	Lysophospholipid acyltransferase LPCAT4	+	0.814263	3.52085	2.62994	0.023372	0.0456937
ENSG00000116584	Q92974	Q92974	UPREGULATED	ARHG2_HUMAN	ARHGEF2	9181	Rho guanine nucleotide exchange factor 2	+	0.812372	7.13954	26.5493	2.41669e-11	2.18929e-09
ENSG00000110628	Q96BI1	Q96BI1	UPREGULATED	S22AI_HUMAN	SLC22A18	5002	Solute carrier family 22 member 18	+	0.806935	5.27597	8.05069	6.06684e-06	3.60499e-05
ENSG00000185215	Q03169	Q03169	UPREGULATED	TNAP2_HUMAN	TNFAIP2	7127	Tumor necrosis factor alpha-induced protein 2	+	0.798376	5.46803	13.3186	3.86347e-08	5.60312e-07
ENSG00000165169	P51808	P51808	UPREGULATED	DYLT3_HUMAN	DYNLT3	6990	Dynein light chain Tctex-type 3	+	0.794913	5.33052	7.19367	1.746e-05	8.71979e-05
ENSG00000117632	P16949	P16949	UPREGULATED	STMN1_HUMAN	STMN1	3925	Stathmin	+	0.793906	8.8438	10.846	3.20189e-07	3.14914e-06
ENSG00000131378	Q14699	Q14699	UPREGULATED	RFTN1_HUMAN	RFTN1	23180	Raftlin	+	0.79273	6.24761	14.7977	1.28083e-08	2.21407e-07
ENSG00000198380	Q06210	Q06210	UPREGULATED	GFPT1_HUMAN	GFPT1	2673	Glutamine--fructose-6-phosphate aminotransferase [isomerizing] 1	+	0.792471	8.6057	20.4295	4.11517e-10	1.49839e-08
ENSG00000205413	Q5K651	Q5K651	UPREGULATED	SAMD9_HUMAN	SAMD9	54809	Sterile alpha motif domain-containing protein 9	+	0.792234	4.70555	2.65143	0.0224917	0.0442254
ENSG00000179085	Q9P2X0	Q9P2X0	UPREGULATED	DPM3_HUMAN	DPM3	54344	Dolichol-phosphate mannosyltransferase subunit 3	+	0.789553	4.75806	3.35669	0.00638265	0.0149287
ENSG00000146858	Q96H79	Q96H79	UPREGULATED	ZCCHL_HUMAN	ZC3HAV1L	92092	Zinc finger CCCH-type antiviral protein 1-like	+	0.787332	5.34428	5.73122	0.000130868	0.000501027
ENSG00000167644	Q9GZP8	Q9GZP8	UPREGULATED	IMUP_HUMAN	IMUP	64073	Immortalization up-regulated protein	+	0.786373	5.28582	23.0663	1.11041e-10	6.00089e-09
ENSG00000150093	P05556	P05556	UPREGULATED	ITB1_HUMAN	ITGB1	3688	Integrin beta-1	+	0.785962	10.7329	31.2946	4.03171e-12	7.66622e-10
#N/A	P31749;P31751	P31749;P31751	UPREGULATED	AKT1_HUMAN;AKT2_HUMAN	AKT1;AKT2	#N/A	RAC-alpha serine/threonine-protein kinase	+	0.785434	3.57901	2.86502	0.0153472	0.0318279
ENSG00000119655	P61916	P61916	UPREGULATED	NPC2_HUMAN	NPC2	10577	NPC intracellular cholesterol transporter 2	+	0.784098	7.48563	10.5003	4.44491e-07	4.07503e-06
ENSG00000138434	P28290	P28290	UPREGULATED	ITPI2_HUMAN	ITPRID2	6744	Protein ITPRID2	+	0.78386	5.09722	6.67799	3.44066e-05	0.000158567
#N/A	P43353;P51648	P30838;P43353;P48448;P51648	UPREGULATED	AL3A2_HUMAN;AL3B1_HUMAN	ALDH3A2;ALDH3B1	#N/A	Aldehyde dehydrogenase family 3 member B1	+	0.782679	6.49916	20.4788	4.00984e-10	1.47047e-08
ENSG00000111674	P09104	P09104	UPREGULATED	ENOG_HUMAN	ENO2	2026	Gamma-enolase	+	0.781554	7.95763	26.7751	2.20419e-11	2.09562e-09
ENSG00000173473	Q92922	Q92922	UPREGULATED	SMRC1_HUMAN	SMARCC1	6599	SWI/SNF complex subunit SMARCC1	+	0.77735	3.71974	2.89651	0.0145058	0.0302612
ENSG00000166889	Q86TB9	Q86TB9	UPREGULATED	PATL1_HUMAN	PATL1	219988	Protein PAT1 homolog 1	+	0.776415	4.96124	2.99161	0.0122351	0.0261728
ENSG00000136802	Q8IWT6	Q8IWT6	UPREGULATED	LRC8A_HUMAN	LRRC8A	56262	Volume-regulated anion channel subunit LRRC8A	+	0.77508	3.91799	2.7736	0.0180766	0.0366964
ENSG00000213995	Q8IW45	Q8IW45	UPREGULATED	NNRD_HUMAN	NAXD	55739	ATP-dependent (S)-NAD(P)H-hydrate dehydratase	+	0.771467	3.99813	3.77716	0.00305054	0.00782292
ENSG00000103876	P16930	P16930	UPREGULATED	FAAA_HUMAN	FAH	2184	Fumarylacetoacetase	+	0.771062	8.41536	37.5506	5.50161e-13	2.04023e-10
ENSG00000100897	Q8TEB1	Q8TEB1	UPREGULATED	DCA11_HUMAN	DCAF11	80344	DDB1- and CUL4-associated factor 11	+	0.770679	3.29673	2.94818	0.0132241	0.0280084
#N/A	O94808;Q06210	O94808;Q06210	UPREGULATED	GFPT1_HUMAN;GFPT2_HUMAN	GFPT1;GFPT2	#N/A	Glutamine--fructose-6-phosphate aminotransferase [isomerizing] 2	+	0.769063	6.41392	15.871	6.11157e-09	1.24506e-07
ENSG00000197321	O95425	O95425	UPREGULATED	SVIL_HUMAN	SVIL	6840	Supervillin	+	0.767364	6.04961	12.9365	5.23095e-08	7.01193e-07
ENSG00000186522	Q9P0V9	Q9P0V9	UPREGULATED	SEP10_HUMAN	SEPTIN10	151011	Septin-10	+	0.766828	8.25289	29.8086	6.85315e-12	9.67919e-10
ENSG00000141756	Q96AY3	Q96AY3	UPREGULATED	FKB10_HUMAN	FKBP10	60681	Peptidyl-prolyl cis-trans isomerase FKBP10	+	0.759183	8.82802	19.9078	5.43528e-10	1.8701e-08
ENSG00000120690	P32519	P32519	UPREGULATED	ELF1_HUMAN	ELF1	1997	ETS-related transcription factor Elf-1	+	0.755521	3.54939	3.60085	0.00414959	0.0102177
ENSG00000115756	P37235	P37235	UPREGULATED	HPCL1_HUMAN	HPCAL1	3241	Hippocalcin-like protein 1	+	0.754656	8.4003	19.7592	5.89102e-10	1.97676e-08
ENSG00000072210	P51648	P51648	UPREGULATED	AL3A2_HUMAN	ALDH3A2	224	Aldehyde dehydrogenase family 3 member A2	+	0.753655	7.06954	21.1477	2.83637e-10	1.13765e-08
ENSG00000145715	P20936	P20936	UPREGULATED	RASA1_HUMAN	RASA1	5921	Ras GTPase-activating protein 1	+	0.750511	7.3759	21.5029	2.37011e-10	1.0312e-08
ENSG00000134824	O95864	O95864	UPREGULATED	FADS2_HUMAN	FADS2	9415	Acyl-CoA 6-desaturase	+	0.747508	6.28167	14.3456	1.77529e-08	2.92126e-07
#N/A	P16949;Q93045	P16949;Q93045;Q9H169	UPREGULATED	STMN1_HUMAN;STMN2_HUMAN	STMN1;STMN2	#N/A	Stathmin	+	0.745526	8.55256	9.36448	1.39573e-06	1.04371e-05
ENSG00000105223	Q8IV08	Q8IV08	UPREGULATED	PLD3_HUMAN	PLD3	23646	5'-3' exonuclease PLD3	+	0.740018	6.86681	14.8855	1.20341e-08	2.13046e-07
ENSG00000005893	P13473	P13473	UPREGULATED	LAMP2_HUMAN	LAMP2	3920	Lysosome-associated membrane glycoprotein 2	+	0.739364	10.207	10.2867	5.46825e-07	4.77974e-06
ENSG00000189171	Q99584	Q99584	UPREGULATED	S10AD_HUMAN	S100A13	6284	Protein S100-A13	+	0.737015	8.61753	27.1264	1.91296e-11	1.92572e-09
#N/A	P0DP23;P0DP24;P0DP25	P0DP23;P0DP24;P0DP25	UPREGULATED	CALM1_HUMAN;CALM2_HUMAN;CALM3_HUMAN	CALM1;CALM2;CALM3	#N/A	Calmodulin-1	+	0.736197	6.24634	6.39171	5.08816e-05	0.00022124
ENSG00000143815	Q14739	Q14739	UPREGULATED	LBR_HUMAN	LBR	3930	Delta(14)-sterol reductase LBR	+	0.724866	7.98414	11.9853	1.1529e-07	1.30662e-06
ENSG00000205336	Q9Y653	Q9Y653	UPREGULATED	AGRG1_HUMAN	ADGRG1	9289	Adhesion G-protein coupled receptor G1	+	0.719259	3.43783	2.80919	0.0169607	0.0347056
ENSG00000152904	O95749	O95749	UPREGULATED	GGPPS_HUMAN	GGPS1	9453	Geranylgeranyl pyrophosphate synthase	+	0.718293	3.39394	2.74706	0.0189561	0.038165
ENSG00000033867	Q9Y6M7	Q9Y6M7	UPREGULATED	S4A7_HUMAN	SLC4A7	9497	Sodium bicarbonate cotransporter 3	+	0.716369	4.05257	3.42908	0.00561497	0.0133769
ENSG00000126803	P54652	P54652	UPREGULATED	HSP72_HUMAN	HSPA2	3306	Heat shock-related 70 kDa protein 2	+	0.714221	5.33683	6.70756	3.30639e-05	0.000153759
ENSG00000025708	P19971	P19971	UPREGULATED	TYPH_HUMAN	TYMP	1890	Thymidine phosphorylase	+	0.710214	6.86492	17.025	2.89923e-09	7.12185e-08
#N/A	O43150;Q9ULH1	O43150;Q9ULH1	UPREGULATED	ASAP1_HUMAN;ASAP2_HUMAN	ASAP1;ASAP2	#N/A	Arf-GAP with SH3 domain, ANK repeat and PH domain-containing protein 2	+	0.708628	4.02738	3.16168	0.00902897	0.0201383
ENSG00000170955	Q969G5	Q969G5	UPREGULATED	CAVN3_HUMAN	CAVIN3	112464	Caveolae-associated protein 3	+	0.707521	5.068	6.53928	4.15327e-05	0.000186552
ENSG00000155366	P08134	P08134;P62745	UPREGULATED	RHOC_HUMAN	RHOC	389	Rho-related GTP-binding protein RhoC	+	0.706416	7.50379	9.24328	1.58729e-06	1.14938e-05
ENSG00000131069	Q9NR19	Q9NR19	UPREGULATED	ACSA_HUMAN	ACSS2	55902	Acetyl-coenzyme A synthetase, cytoplasmic	+	0.706199	6.03349	14.14	2.06583e-08	3.30403e-07
ENSG00000100196	O43731	O43731	UPREGULATED	ERD23_HUMAN	KDELR3	11015	ER lumen protein-retaining receptor 3	+	0.704034	5.57758	14.8475	1.23624e-08	2.16496e-07
ENSG00000116791	Q08257	Q08257	UPREGULATED	QOR_HUMAN	CRYZ	1429	Quinone oxidoreductase	+	0.698627	7.55512	20.709	3.55508e-10	1.3774e-08
#N/A	P19367;Q2TB90	P19367;Q2TB90	UPREGULATED	HKDC1_HUMAN;HXK1_HUMAN	HK1;HKDC1	#N/A	Hexokinase-1	+	0.694844	6.04134	10.7838	3.39433e-07	3.28182e-06
ENSG00000198648	Q9UEW8	Q9UEW8	UPREGULATED	STK39_HUMAN	STK39	27347	STE20/SPS1-related proline-alanine-rich protein kinase	+	0.692889	6.10744	9.28648	1.51593e-06	1.11018e-05
ENSG00000156515	P19367	P19367	UPREGULATED	HXK1_HUMAN	HK1	3098	Hexokinase-1	+	0.691328	7.33457	27.1596	1.88766e-11	1.92572e-09
ENSG00000196187	O94886	O94886	UPREGULATED	CSCL1_HUMAN	TMEM63A	9725	CSC1-like protein 1	+	0.69092	4.2041	3.25383	0.00766191	0.0175193
ENSG00000166340	O14773	O14773	UPREGULATED	TPP1_HUMAN	TPP1	1200	Tripeptidyl-peptidase 1	+	0.688527	6.37905	18.5993	1.12723e-09	3.26961e-08
ENSG00000122694	Q9H4G4	Q9H4G4	UPREGULATED	GAPR1_HUMAN	GLIPR2	152007	Golgi-associated plant pathogenesis-related protein 1	+	0.686966	6.1937	15.6205	7.23275e-09	1.40655e-07
ENSG00000171867	P04156	P04156	UPREGULATED	PRIO_HUMAN	PRNP	5621	Major prion protein	+	0.684806	7.75533	15.0863	1.0448e-08	1.90891e-07
#N/A	P18433;P23469	P18433;P23469	UPREGULATED	PTPRA_HUMAN;PTPRE_HUMAN	PTPRA;PTPRE	#N/A	Receptor-type tyrosine-protein phosphatase alpha	+	0.681379	4.39194	2.59493	0.0248792	0.0481999
ENSG00000183856	Q86VI3	Q86VI3	UPREGULATED	IQGA3_HUMAN	IQGAP3	128239	Ras GTPase-activating-like protein IQGAP3	+	0.680338	6.13514	22.7624	1.28168e-10	6.64659e-09
ENSG00000180979	Q8N9N7	Q8N9N7	UPREGULATED	LRC57_HUMAN	LRRC57	255252	Leucine-rich repeat-containing protein 57	+	0.679835	5.7446	12.7796	5.93798e-08	7.73746e-07
ENSG00000149948	P52926	P52926	UPREGULATED	HMGA2_HUMAN	HMGA2	8091	High mobility group protein HMGI-C	+	0.679053	5.99397	4.84691	0.000510098	0.00162965
ENSG00000108604	Q92925	Q92925	UPREGULATED	SMRD2_HUMAN	SMARCD2	6603	SWI/SNF-related matrix-associated actin-dependent regulator of chromatin subfamily D member 2	+	0.675769	4.12558	3.00106	0.0120301	0.0258097
ENSG00000136153	Q8WWI1	Q8WWI1	UPREGULATED	LMO7_HUMAN	LMO7	4008	LIM domain only protein 7	+	0.674409	5.87732	12.1568	9.95846e-08	1.17263e-06
ENSG00000071967	Q53TN4	Q53TN4	UPREGULATED	CYBR1_HUMAN	CYBRD1	79901	Plasma membrane ascorbate-dependent reductase CYBRD1	+	0.672926	6.77601	7.97972	6.60105e-06	3.85549e-05
ENSG00000067066	P23497	P23497;Q9H930	UPREGULATED	SP100_HUMAN	SP100	6672	Nuclear autoantigen Sp-100	+	0.670888	6.68151	10.832	3.24414e-07	3.17905e-06
ENSG00000110841	Q86W92	Q86W92;Q8ND30	UPREGULATED	LIPB1_HUMAN	PPFIBP1	8496	Liprin-beta-1	+	0.66924	6.54781	18.3407	1.30951e-09	3.63405e-08
ENSG00000168497	O95810	O95810	UPREGULATED	CAVN2_HUMAN	CAVIN2	8436	Caveolae-associated protein 2	+	0.668564	7.12456	10.0238	7.09097e-07	5.82481e-06
ENSG00000075303	Q8TBP6	Q8TBP6	UPREGULATED	S2540_HUMAN	SLC25A40	55972	Probable mitochondrial glutathione transporter SLC25A40	+	0.667913	5.57056	8.6365	3.08499e-06	2.00994e-05
ENSG00000131067	Q9UJ14	Q9UJ14	UPREGULATED	GGT7_HUMAN	GGT7	2686	Glutathione hydrolase 7	+	0.662975	5.1352	6.96959	2.33499e-05	0.000112036
ENSG00000117862	O95881	O95881	UPREGULATED	TXD12_HUMAN	TXNDC12	51060	Thioredoxin domain-containing protein 12	+	0.658672	7.49949	18.4414	1.23497e-09	3.4837e-08
ENSG00000126458	P10301	P10301	UPREGULATED	RRAS_HUMAN	RRAS	6237	Ras-related protein R-Ras	+	0.657087	8.19739	23.3503	9.7273e-11	5.44967e-09
ENSG00000178467	Q9NXG6	Q9NXG6	UPREGULATED	P4HTM_HUMAN	P4HTM	54681	Transmembrane prolyl 4-hydroxylase	+	0.6525	4.67181	3.27675	0.00735593	0.0169199
ENSG00000136156	Q9Y287	Q9Y287	UPREGULATED	ITM2B_HUMAN	ITM2B	9445	Integral membrane protein 2B	+	0.647508	5.01021	6.90491	2.54227e-05	0.000120406
ENSG00000196937	Q92520	Q92520	UPREGULATED	FAM3C_HUMAN	FAM3C	10447	Protein FAM3C	+	0.642725	8.55284	21.2649	2.67237e-10	1.09759e-08
ENSG00000134330	Q2TAA2	Q2TAA2	UPREGULATED	IAH1_HUMAN	IAH1	285148	Isoamyl acetate-hydrolyzing esterase 1 homolog	+	0.639101	7.04367	18.7976	1.00618e-09	3.02089e-08
ENSG00000124164	O95292	O95292	UPREGULATED	VAPB_HUMAN	VAPB	9217	Vesicle-associated membrane protein-associated protein B/C	+	0.638227	6.46914	13.1577	4.385e-08	6.08448e-07
ENSG00000099250	O14786	O14786	UPREGULATED	NRP1_HUMAN	NRP1	8829	Neuropilin-1	+	0.637905	6.3802	21.79	2.05402e-10	9.16985e-09
ENSG00000131171	O75368	O75368	UPREGULATED	SH3L1_HUMAN	SH3BGRL	6451	Adapter SH3BGRL	+	0.63562	6.5483	11.7503	1.41333e-07	1.56044e-06
ENSG00000135775	Q14746	Q14746	UPREGULATED	COG2_HUMAN	COG2	22796	Conserved oligomeric Golgi complex subunit 2	+	0.635365	5.44268	10.6811	3.73993e-07	3.52956e-06
ENSG00000100003	O76054	O76054	UPREGULATED	S14L2_HUMAN	SEC14L2	23541	SEC14-like protein 2	+	0.633984	4.7636	3.03388	0.0113442	0.0245433
ENSG00000127946	O00291	O00291	UPREGULATED	HIP1_HUMAN	HIP1	3092	Huntingtin-interacting protein 1	+	0.629224	6.82102	12.805	5.81677e-08	7.5988e-07
ENSG00000005884	P26006	P26006	UPREGULATED	ITA3_HUMAN	ITGA3	3675	Integrin alpha-3	+	0.628815	8.79068	24.773	5.12533e-11	3.65464e-09
ENSG00000168140	Q6EMK4	Q6EMK4	UPREGULATED	VASN_HUMAN	VASN	114990	Vasorin	+	0.625115	6.49782	7.39964	1.34383e-05	7.03283e-05
ENSG00000165233	Q96LW7	Q96LW7	UPREGULATED	CAR19_HUMAN	CARD19	84270	Caspase recruitment domain-containing protein 19	+	0.623841	3.59059	2.59655	0.0248073	0.0481042
#N/A	P08134;P61586	P08134;P61586;P62745	UPREGULATED	RHOA_HUMAN;RHOC_HUMAN	RHOA;RHOC	#N/A	Rho-related GTP-binding protein RhoC	+	0.620767	9.67115	10.1455	6.28302e-07	5.33174e-06
ENSG00000014641	P40925	P40925	UPREGULATED	MDHC_HUMAN	MDH1	4190	Malate dehydrogenase, cytoplasmic	+	0.618821	9.96119	14.8553	1.22947e-08	2.16496e-07
ENSG00000053371	O43488	O43488	UPREGULATED	ARK72_HUMAN	AKR7A2	8574	Aflatoxin B1 aldehyde reductase member 2	+	0.617565	8.04324	18.0361	1.56641e-09	4.26768e-08
ENSG00000099256	Q9NRG1	Q9NRG1	UPREGULATED	PRDC1_HUMAN	PRTFDC1	56952	Phosphoribosyltransferase domain-containing protein 1	+	0.615264	6.17565	11.2329	2.2411e-07	2.31972e-06
#N/A	P19367;P52789	P19367;P52789	UPREGULATED	HXK1_HUMAN;HXK2_HUMAN	HK1;HK2	#N/A	Hexokinase-1	+	0.613288	7.51119	15.5134	7.77894e-09	1.49577e-07
ENSG00000171552	Q07817	Q07817	UPREGULATED	B2CL1_HUMAN	BCL2L1	598	Bcl-2-like protein 1	+	0.612901	5.41789	5.22582	0.000280933	0.000966047
ENSG00000166128	Q92930	Q92930	UPREGULATED	RAB8B_HUMAN	RAB8B	51762	Ras-related protein Rab-8B	+	0.612335	7.01619	11.1742	2.36424e-07	2.43736e-06
ENSG00000130402	O43707	O43707	UPREGULATED	ACTN4_HUMAN	ACTN4	81	Alpha-actinin-4	+	0.610178	10.3517	16.9002	3.13543e-09	7.54368e-08
ENSG00000100522	Q96EK6	Q96EK6	UPREGULATED	GNA1_HUMAN	GNPNAT1	64841	Glucosamine 6-phosphate N-acetyltransferase	+	0.609177	5.94388	5.94279	9.60688e-05	0.000379983
ENSG00000134308	P27348	P27348	UPREGULATED	1433T_HUMAN	YWHAQ	10971	14-3-3 protein theta	+	0.605405	9.95323	21.4216	2.46897e-10	1.03899e-08
ENSG00000157654	Q9Y2D5	Q9Y2D5	UPREGULATED	AKAP2_HUMAN	AKAP2	445815	A-kinase anchor protein 2	+	0.604473	6.93206	13.0995	4.59229e-08	6.30396e-07
ENSG00000145349	Q13557	Q13557	UPREGULATED	KCC2D_HUMAN	CAMK2D	817	Calcium/calmodulin-dependent protein kinase type II subunit delta	+	0.603936	6.02708	12.6067	6.83888e-08	8.64798e-07
ENSG00000203667	Q5RI15	Q5RI15	UPREGULATED	COX20_HUMAN	COX20	116228	Cytochrome c oxidase assembly protein COX20, mitochondrial	+	0.603551	6.18957	8.55968	3.36433e-06	2.17292e-05
ENSG00000108479	P51570	P51570	UPREGULATED	GALK1_HUMAN	GALK1	2584	Galactokinase	+	0.603375	7.93114	26.0988	2.91051e-11	2.47748e-09
ENSG00000099977	P30046	P30046;A6NHG4	UPREGULATED	DOPD_HUMAN	DDT	1652	D-dopachrome decarboxylase	+	0.602496	8.71287	18.6936	1.06784e-09	3.15073e-08
#N/A	O14640;P54792	O14640;P54792	UPREGULATED	DVL1_HUMAN;DVLP1_HUMAN	DVL1;DVL1P1	#N/A	Segment polarity protein dishevelled homolog DVL-1	+	0.601456	4.08946	2.62516	0.0235724	0.046033
ENSG00000169682	Q9H2V7	Q9H2V7	DOWNREGULATED	SPNS1_HUMAN	SPNS1	83985	Protein spinster homolog 1	+	-0.600723	5.36766	-16.119	5.18476e-09	1.09093e-07
ENSG00000161970	P61254	P61254;Q9UNX3	DOWNREGULATED	RL26_HUMAN	RPL26	6154	Large ribosomal subunit protein uL24	+	-0.603802	8.51996	-14.3729	1.74019e-08	2.88198e-07
#N/A	P07900;P08238	P07900;P08238;Q58FF7;Q58FF6	DOWNREGULATED	HS90A_HUMAN;HS90B_HUMAN	HSP90AA1;HSP90AB1	#N/A	Heat shock protein HSP 90-alpha	+	-0.604132	12.5862	-24.1327	6.80742e-11	4.53887e-09
ENSG00000196510	Q9UJX3	Q9UJX3	DOWNREGULATED	APC7_HUMAN	ANAPC7	51434	Anaphase-promoting complex subunit 7	+	-0.604521	4.92106	-6.99777	2.2504e-05	0.000108546
ENSG00000196923	Q9NR12	Q9NR12	DOWNREGULATED	PDLI7_HUMAN	PDLIM7	9260	PDZ and LIM domain protein 7	+	-0.605882	8.54957	-19.0243	8.84871e-10	2.7367e-08
ENSG00000113648	O75367	O75367	DOWNREGULATED	H2AY_HUMAN	MACROH2A1	9555	Core histone macro-H2A.1	+	-0.605974	7.74949	-12.669	6.49816e-08	8.38229e-07
ENSG00000136942	P42766	P42766	DOWNREGULATED	RL35_HUMAN	RPL35	11224	Large ribosomal subunit protein uL29	+	-0.608531	8.02353	-8.31669	4.44303e-06	2.77163e-05
ENSG00000131469	P61353	P61353	DOWNREGULATED	RL27_HUMAN	RPL27	6155	Large ribosomal subunit protein eL27	+	-0.608662	8.77322	-11.0772	2.58393e-07	2.63212e-06
ENSG00000044115	P35221	P35221	DOWNREGULATED	CTNA1_HUMAN	CTNNA1	1495	Catenin alpha-1	+	-0.60992	7.26948	-19.3477	7.38479e-10	2.34034e-08
ENSG00000112742	P33981	P33981	DOWNREGULATED	TTK_HUMAN	TTK	7272	Dual specificity protein kinase TTK	+	-0.612862	4.64749	-7.35706	1.41796e-05	7.32786e-05
ENSG00000196531	E9PAV3	Q13765;E9PAV3	DOWNREGULATED	NACAM_HUMAN	NACA	4666	Nascent polypeptide-associated complex subunit alpha, muscle-specific form	+	-0.61316	8.51453	-28.1729	1.2672e-11	1.41431e-09
ENSG00000163041	P84243	P68431;P84243;Q16695;Q71DI3	DOWNREGULATED	H33_HUMAN	H3-3A	3020	Histone H3.3	+	-0.613289	9.43634	-7.07354	2.03887e-05	9.95014e-05
ENSG00000164692	P08123	P08123	DOWNREGULATED	CO1A2_HUMAN	COL1A2	1278	Collagen alpha-2(I) chain	+	-0.614657	6.9943	-9.49726	1.21413e-06	9.26205e-06
ENSG00000177192	Q9Y606	Q9Y606	DOWNREGULATED	PUS1_HUMAN	PUS1	80324	Pseudouridylate synthase 1 homolog	+	-0.614703	4.74122	-6.19561	6.69382e-05	0.000278624
ENSG00000133835	P51659	P51659	DOWNREGULATED	DHB4_HUMAN	HSD17B4	3295	Peroxisomal multifunctional enzyme type 2	+	-0.61545	8.36911	-30.9247	4.59006e-12	8.41621e-10
ENSG00000110104	Q9H6F5	Q9H6F5	DOWNREGULATED	CCD86_HUMAN	CCDC86	79080	Coiled-coil domain-containing protein 86	+	-0.615682	3.17155	-3.15879	0.0090755	0.0202235
ENSG00000082212	P23368	P23368	DOWNREGULATED	MAOM_HUMAN	ME2	4200	NAD-dependent malic enzyme, mitochondrial	+	-0.616304	6.36576	-18.5592	1.15358e-09	3.30866e-08
ENSG00000082516	Q8TEQ6	Q8TEQ6	DOWNREGULATED	GEMI5_HUMAN	GEMIN5	25929	Gem-associated protein 5	+	-0.617873	5.18517	-10.5199	4.36203e-07	4.0062e-06
#N/A	P26232;P35221	P26232;P35221	DOWNREGULATED	CTNA1_HUMAN;CTNA2_HUMAN	CTNNA1;CTNNA2	#N/A	Catenin alpha-2	+	-0.623254	5.61822	-6.99733	2.25169e-05	0.000108546
ENSG00000114416	P51114	P51114	DOWNREGULATED	FXR1_HUMAN	FXR1	8087	RNA-binding protein FXR1	+	-0.623703	6.63348	-18.8749	9.62874e-10	2.9425e-08
ENSG00000065978	P67809	P67809	DOWNREGULATED	YBOX1_HUMAN	YBX1	4904	Y-box-binding protein 1	+	-0.624935	9.87075	-10.7224	3.5967e-07	3.41953e-06
ENSG00000177963	Q9NPQ8	Q9NPQ8;Q9NVN3	DOWNREGULATED	RIC8A_HUMAN	RIC8A	60626	Synembryn-A	+	-0.62565	5.35204	-7.3669	1.40045e-05	7.27013e-05
#N/A	Q9BQ39;Q9NR30	Q9BQ39;Q9NR30	DOWNREGULATED	DDX21_HUMAN;DDX50_HUMAN	DDX21;DDX50	#N/A	ATP-dependent RNA helicase DDX50	+	-0.626055	6.29792	-10.7567	3.48199e-07	3.34996e-06
ENSG00000114030	P52294	P52294	DOWNREGULATED	IMA5_HUMAN	KPNA1	3836	Importin subunit alpha-5	+	-0.62676	5.50023	-7.48115	1.21324e-05	6.44134e-05
ENSG00000278615	E9PRG8	E9PRG8	DOWNREGULATED	CK098_HUMAN	C11orf98	102288414	Uncharacterized protein C11orf98	+	-0.627482	5.56431	-5.36844	0.000225623	0.000799414
ENSG00000120802	P42166;P42167	P42166;P42167	DOWNREGULATED	LAP2A_HUMAN;LAP2B_HUMAN	TMPO	7112	Lamina-associated polypeptide 2, isoform alpha	+	-0.627967	8.62294	-22.8696	1.21821e-10	6.44774e-09
ENSG00000111907	Q16890	Q16890	DOWNREGULATED	TPD53_HUMAN	TPD52L1	7164	Tumor protein D53	+	-0.63234	4.84128	-4.59279	0.000769639	0.00234222
ENSG00000163507	Q8TCG1	Q8TCG1	DOWNREGULATED	CIP2A_HUMAN	CIP2A	57650	Protein CIP2A	+	-0.6356	5.07612	-5.50636	0.000183023	0.000667832
ENSG00000106211	P04792	P04792	DOWNREGULATED	HSPB1_HUMAN	HSPB1	3315	Heat shock protein beta-1	+	-0.635876	11.7915	-18.0311	1.57108e-09	4.26768e-08
ENSG00000108256	Q7Z417	Q7Z417	DOWNREGULATED	NUFP2_HUMAN	NUFIP2	57532	FMR1-interacting protein NUFIP2	+	-0.636609	5.20678	-10.0271	7.06771e-07	5.82362e-06
ENSG00000070756	P11940	P11940;Q4VXU2	DOWNREGULATED	PABP1_HUMAN	PABPC1	26986	Polyadenylate-binding protein 1	+	-0.638248	9.09582	-20.9324	3.16702e-10	1.26043e-08
#N/A	P32455;P32456	P32455;P32456	DOWNREGULATED	GBP1_HUMAN;GBP2_HUMAN	GBP1;GBP2	#N/A	Guanylate-binding protein 1	+	-0.638435	6.23313	-10.9812	2.82335e-07	2.82006e-06
ENSG00000139428	Q96EY8	Q96EY8	DOWNREGULATED	MMAB_HUMAN	MMAB	326625	Corrinoid adenosyltransferase MMAB	+	-0.639036	5.63746	-8.31699	4.44146e-06	2.77163e-05
ENSG00000163882	P52434	P52434	DOWNREGULATED	RPAB3_HUMAN	POLR2H	5437	DNA-directed RNA polymerases I, II, and III subunit RPABC3	+	-0.640136	6.26752	-12.5729	7.03176e-08	8.82666e-07
ENSG00000164902	Q9H814	Q9H814	DOWNREGULATED	PHAX_HUMAN	PHAX	51808	Phosphorylated adapter RNA export protein	+	-0.640777	5.27534	-6.54913	4.09779e-05	0.000184544
ENSG00000115461	P24593	P24593	DOWNREGULATED	IBP5_HUMAN	IGFBP5	3488	Insulin-like growth factor-binding protein 5	+	-0.643204	6.70366	-8.05478	6.0375e-06	3.59664e-05
ENSG00000136045	Q13610	Q13610	DOWNREGULATED	PWP1_HUMAN	PWP1	11137	Periodic tryptophan protein 1 homolog	+	-0.644234	5.5305	-7.34192	1.44537e-05	7.42055e-05
ENSG00000165458	O15357	O15357	DOWNREGULATED	SHIP2_HUMAN	INPPL1	3636	Phosphatidylinositol 3,4,5-trisphosphate 5-phosphatase 2	+	-0.644918	5.44217	-12.3912	8.17531e-08	9.96961e-07
#N/A	O95757;P34932	P34932;O95757	DOWNREGULATED	HS74L_HUMAN;HSP74_HUMAN	HSPA4;HSPA4L	#N/A	Heat shock 70 kDa protein 4L	+	-0.645064	6.63091	-9.89182	8.09663e-07	6.55648e-06
ENSG00000159217	Q9NZI8	Q9NZI8	DOWNREGULATED	IF2B1_HUMAN	IGF2BP1	10642	Insulin-like growth factor 2 mRNA-binding protein 1	+	-0.646585	6.27194	-12.0172	1.12176e-07	1.28265e-06
ENSG00000278540	Q13085	Q13085	DOWNREGULATED	ACACA_HUMAN	ACACA	31	Acetyl-CoA carboxylase 1	+	-0.648086	6.29443	-23.4108	9.45839e-11	5.44967e-09
ENSG00000116157	Q96SL4	Q96SL4	DOWNREGULATED	GPX7_HUMAN	GPX7	2882	Glutathione peroxidase 7	+	-0.649914	5.04213	-7.67263	9.57151e-06	5.27821e-05
ENSG00000166946	O95273	O95273	DOWNREGULATED	CCDB1_HUMAN	CCNDBP1	23582	Cyclin-D1-binding protein 1	+	-0.651273	3.22903	-2.6888	0.0210384	0.0417676
ENSG00000179295	Q06124	Q06124	DOWNREGULATED	PTN11_HUMAN	PTPN11	5781	Tyrosine-protein phosphatase non-receptor type 11	+	-0.652454	6.25023	-14.8531	1.23134e-08	2.16496e-07
ENSG00000085231	Q9Y3D8	Q9Y3D8	DOWNREGULATED	KAD6_HUMAN	AK6	102157402	Adenylate kinase isoenzyme 6	+	-0.65524	5.07578	-6.82348	2.83176e-05	0.000133501
ENSG00000120733	Q7LBC6	Q7LBC6	DOWNREGULATED	KDM3B_HUMAN	KDM3B	51780	Lysine-specific demethylase 3B	+	-0.655971	5.85528	-8.16993	5.2713e-06	3.2103e-05
ENSG00000169714	P62633	P62633	DOWNREGULATED	CNBP_HUMAN	CNBP	7555	CCHC-type zinc finger nucleic acid binding protein	+	-0.656888	6.84909	-6.22883	6.38755e-05	0.000268141
ENSG00000090889	O95239	O95239;Q2VIQ3	DOWNREGULATED	KIF4A_HUMAN	KIF4A	24137	Chromosome-associated kinesin KIF4A	+	-0.66209	5.2903	-15.0417	1.07795e-08	1.94866e-07
ENSG00000103855	Q5ZPR3	Q5ZPR3	DOWNREGULATED	CD276_HUMAN	CD276	80381	CD276 antigen	+	-0.665391	6.90126	-8.64178	3.06674e-06	2.00191e-05
ENSG00000179604	Q9H3Q1	Q9H3Q1	DOWNREGULATED	BORG4_HUMAN	CDC42EP4	23580	Cdc42 effector protein 4	+	-0.671284	6.01119	-10.792	3.36833e-07	3.26283e-06
ENSG00000161217	P49585	P49585	DOWNREGULATED	PCY1A_HUMAN	PCYT1A	5130	Choline-phosphate cytidylyltransferase A	+	-0.671496	6.98172	-19.7404	5.95134e-10	1.9789e-08
ENSG00000102081	Q06787	Q06787	DOWNREGULATED	FMR1_HUMAN	FMR1	2332	Fragile X messenger ribonucleoprotein 1	+	-0.67166	4.31764	-3.28328	0.0072711	0.0167699
ENSG00000073792	Q9Y6M1	Q9Y6M1	DOWNREGULATED	IF2B2_HUMAN	IGF2BP2	10644	Insulin-like growth factor 2 mRNA-binding protein 2	+	-0.674296	6.8042	-23.7623	8.04926e-11	4.9789e-09
#N/A	P60842;Q14240	P60842;Q14240	DOWNREGULATED	IF4A1_HUMAN;IF4A2_HUMAN	EIF4A1;EIF4A2	#N/A	Eukaryotic initiation factor 4A-I	+	-0.674974	11.7319	-30.0487	6.27935e-12	9.31351e-10
#N/A	P11142;P34931;P54652	P0DMV8;P0DMV9;P11142;P17066;P34931;P54652;P48741	DOWNREGULATED	HS71L_HUMAN;HSP72_HUMAN;HSP7C_HUMAN	HSPA1L;HSPA2;HSPA8	#N/A	Heat shock cognate 71 kDa protein	+	-0.679566	12.063	-25.7312	3.39524e-11	2.76685e-09
ENSG00000165775	Q9BWH2	Q9BWH2	DOWNREGULATED	FUND2_HUMAN	FUNDC2	65991	FUN14 domain-containing protein 2	+	-0.681959	4.76203	-7.09163	1.99157e-05	9.74712e-05
ENSG00000140416	P09493	P09493	DOWNREGULATED	TPM1_HUMAN	TPM1	7168	Tropomyosin alpha-1 chain	+	-0.683203	8.65152	-5.14144	0.000320277	0.0010832
ENSG00000138160	P52732	P52732	DOWNREGULATED	KIF11_HUMAN	KIF11	3832	Kinesin-like protein KIF11	+	-0.68625	5.44117	-6.90878	2.52934e-05	0.000120015
ENSG00000078674	Q15154	Q15154	DOWNREGULATED	PCM1_HUMAN	PCM1	5108	Pericentriolar material 1 protein	+	-0.687752	5.30959	-7.72289	9.00029e-06	5.01166e-05
ENSG00000145907	Q13283	Q13283	DOWNREGULATED	G3BP1_HUMAN	G3BP1	10146	Ras GTPase-activating protein-binding protein 1	+	-0.690099	7.92554	-27.7459	1.49637e-11	1.56783e-09
ENSG00000139192	Q9BX59	Q9BX59	DOWNREGULATED	TPSNR_HUMAN	TAPBPL	55080	Tapasin-related protein	+	-0.691604	5.00824	-2.64926	0.0225791	0.0443583
ENSG00000184357	P16401	P16401	DOWNREGULATED	H15_HUMAN	H1-5	3009	Histone H1.5	+	-0.697684	9.68912	-7.95885	6.76761e-06	3.93042e-05
ENSG00000100297	P33992	P33992	DOWNREGULATED	MCM5_HUMAN	MCM5	4174	DNA replication licensing factor MCM5	+	-0.701635	7.67163	-18.8318	9.86774e-10	2.99769e-08
ENSG00000168036	P35222	P35222	DOWNREGULATED	CTNB1_HUMAN	CTNNB1	1499	Catenin beta-1	+	-0.702185	6.35188	-15.9709	5.71814e-09	1.19337e-07
ENSG00000177733	Q13151	Q13151	DOWNREGULATED	ROA0_HUMAN	HNRNPA0	10949	Heterogeneous nuclear ribonucleoprotein A0	+	-0.704572	8.58018	-17.1244	2.72492e-09	6.79115e-08
ENSG00000166197	Q14978	Q14978	DOWNREGULATED	NOLC1_HUMAN	NOLC1	9221	Nucleolar and coiled-body phosphoprotein 1	+	-0.705227	6.40674	-9.85734	8.38405e-07	6.7361e-06
ENSG00000071994	Q16342	Q16342	DOWNREGULATED	PDCD2_HUMAN	PDCD2	5134	Programmed cell death protein 2	+	-0.705662	4.49208	-2.57843	0.0256224	0.049379
ENSG00000137145	Q5VZ89	Q5VZ89	DOWNREGULATED	DEN4C_HUMAN	DENND4C	55667	DENN domain-containing protein 4C	+	-0.705984	3.49515	-2.9428	0.013352	0.0282212
ENSG00000170558	P19022	P19022	DOWNREGULATED	CADH2_HUMAN	CDH2	1000	Cadherin-2	+	-0.714766	6.86321	-16.6812	3.60231e-09	8.28194e-08
ENSG00000104738	P33991	P33991	DOWNREGULATED	MCM4_HUMAN	MCM4	4173	DNA replication licensing factor MCM4	+	-0.714776	7.12872	-18.8034	1.00285e-09	3.02089e-08
ENSG00000169251	Q96D46	Q96D46	DOWNREGULATED	NMD3_HUMAN	NMD3	51068	60S ribosomal export protein NMD3	+	-0.714905	5.0906	-6.58647	3.89452e-05	0.000176474
#N/A	P06753;P09493	P06753;P09493	DOWNREGULATED	TPM1_HUMAN;TPM3_HUMAN	TPM1;TPM3	#N/A	Tropomyosin alpha-3 chain	+	-0.715618	5.67497	-4.85983	0.000499656	0.00160195
ENSG00000103257	Q01650	Q01650	DOWNREGULATED	LAT1_HUMAN	SLC7A5	8140	Large neutral amino acids transporter small subunit 1	+	-0.717708	7.37008	-18.3731	1.28504e-09	3.58555e-08
ENSG00000063660	P35052	P35052	DOWNREGULATED	GPC1_HUMAN	GPC1	2817	Glypican-1	+	-0.718643	6.87799	-17.0821	2.79753e-09	6.93842e-08
ENSG00000198833	Q9Y385	Q9Y385	DOWNREGULATED	UB2J1_HUMAN	UBE2J1	51465	Ubiquitin-conjugating enzyme E2 J1	+	-0.720226	4.81506	-4.22022	0.00142902	0.00402887
ENSG00000142156	P12109	P12109	DOWNREGULATED	CO6A1_HUMAN	COL6A1	1291	Collagen alpha-1(VI) chain	+	-0.72117	6.93918	-20.543	3.87693e-10	1.44233e-08
ENSG00000074211	Q9Y2T4	Q9Y2T4	DOWNREGULATED	2ABG_HUMAN	PPP2R2C	5522	Serine/threonine-protein phosphatase 2A 55 kDa regulatory subunit B gamma isoform	+	-0.722026	4.17861	-3.1663	0.00895476	0.020006
ENSG00000114491	P11172	P11172	DOWNREGULATED	UMPS_HUMAN	UMPS	7372	Uridine 5'-monophosphate synthase	+	-0.723047	6.93915	-23.3583	9.69118e-11	5.44967e-09
ENSG00000168259	Q99615	Q99615	DOWNREGULATED	DNJC7_HUMAN	DNAJC7	7266	DnaJ homolog subfamily C member 7	+	-0.723997	6.08445	-14.3674	1.74714e-08	2.88419e-07
ENSG00000170606	P34932	P34932	DOWNREGULATED	HSP74_HUMAN	HSPA4	3308	Heat shock 70 kDa protein 4	+	-0.725467	8.93315	-28.6016	1.07511e-11	1.25852e-09
ENSG00000144824	Q86SQ0	Q86SQ0	DOWNREGULATED	PHLB2_HUMAN	PHLDB2	90102	Pleckstrin homology-like domain family B member 2	+	-0.726914	5.70732	-10.081	6.69808e-07	5.61895e-06
ENSG00000108963	Q9BZG8	Q9BZG8	DOWNREGULATED	DPH1_HUMAN	DPH1	1801	2-(3-amino-3-carboxypropyl)histidine synthase subunit 1	+	-0.729574	2.8528	-2.6202	0.0237819	0.0464244
ENSG00000161960	P60842	P60842	DOWNREGULATED	IF4A1_HUMAN	EIF4A1	1973	Eukaryotic initiation factor 4A-I	+	-0.729622	10.1384	-25.2175	4.22613e-11	3.19073e-09
ENSG00000164182	Q8N183	Q8N183	DOWNREGULATED	NDUF2_HUMAN	NDUFAF2	91942	NADH dehydrogenase [ubiquinone] 1 alpha subcomplex assembly factor 2	+	-0.732156	5.66432	-10.5518	4.23049e-07	3.92046e-06
ENSG00000106477	Q9BYV8	Q9BYV8	DOWNREGULATED	CEP41_HUMAN	CEP41	95681	Centrosomal protein of 41 kDa	+	-0.736171	4.51597	-5.35386	0.000230708	0.00081406
ENSG00000241343	P83881	P83881	DOWNREGULATED	RL36A_HUMAN	RPL36A	6173	Large ribosomal subunit protein eL42	+	-0.736374	5.11042	-5.76441	0.000124621	0.000481419
ENSG00000076003	Q14566	Q14566	DOWNREGULATED	MCM6_HUMAN	MCM6	4175	DNA replication licensing factor MCM6	+	-0.738256	7.2755	-34.758	1.28121e-12	3.86927e-10
ENSG00000145741	P20290	P20290	DOWNREGULATED	BTF3_HUMAN	BTF3	689	Transcription factor BTF3	+	-0.738942	7.57938	-13.1087	4.55866e-08	6.27458e-07
ENSG00000113013	P38646	P38646	DOWNREGULATED	GRP75_HUMAN	HSPA9	3313	Stress-70 protein, mitochondrial	+	-0.740953	10.3796	-30.0182	6.3493e-12	9.31351e-10
ENSG00000108654	P17844	P17844	DOWNREGULATED	DDX5_HUMAN	DDX5	1655	Probable ATP-dependent RNA helicase DDX5	+	-0.743594	8.01354	-22.0201	1.83385e-10	8.48198e-09
#N/A	P20020;Q01814	P20020;Q01814	DOWNREGULATED	AT2B1_HUMAN;AT2B2_HUMAN	ATP2B1;ATP2B2	#N/A	Plasma membrane calcium-transporting ATPase 1	+	-0.743729	4.99578	-5.21943	0.000283724	0.00097434
ENSG00000181938	Q9BRX5	Q9BRX5	DOWNREGULATED	PSF3_HUMAN	GINS3	64785	DNA replication complex GINS protein PSF3	+	-0.744043	4.25079	-4.8034	0.000546965	0.00173127
ENSG00000092969	P61812	P61812	DOWNREGULATED	TGFB2_HUMAN	TGFB2	7042	Transforming growth factor beta-2 proprotein	+	-0.74901	6.39102	-15.103	1.03265e-08	1.90282e-07
ENSG00000214160	Q92685	Q92685	DOWNREGULATED	ALG3_HUMAN	ALG3	10195	Dol-P-Man:Man(5)GlcNAc(2)-PP-Dol alpha-1,3-mannosyltransferase	+	-0.751113	4.95416	-5.3935	0.000217164	0.000773174
ENSG00000159459	Q8IWV7	Q8IWV7	DOWNREGULATED	UBR1_HUMAN	UBR1	197131	E3 ubiquitin-protein ligase UBR1	+	-0.752264	3.96639	-2.83384	0.0162284	0.0333666
ENSG00000168002	P62487	P62487	DOWNREGULATED	RPB7_HUMAN	POLR2G	5436	DNA-directed RNA polymerase II subunit RPB7	+	-0.752336	4.86111	-2.97172	0.0126785	0.0270393
ENSG00000175866	Q9UQB8	Q9UQB8	DOWNREGULATED	BAIP2_HUMAN	BAIAP2	10458	Brain-specific angiogenesis inhibitor 1-associated protein 2	+	-0.752681	5.02579	-16.303	4.59629e-09	9.99889e-08
ENSG00000073111	P49736	P49736	DOWNREGULATED	MCM2_HUMAN	MCM2	4171	DNA replication licensing factor MCM2	+	-0.753044	7.35253	-23.9732	7.31452e-11	4.63614e-09
ENSG00000166508	P33993	P33993	DOWNREGULATED	MCM7_HUMAN	MCM7	4176	DNA replication licensing factor MCM7	+	-0.753248	7.44323	-19.5707	6.52985e-10	2.12179e-08
ENSG00000197451	Q99729	Q99729	DOWNREGULATED	ROAA_HUMAN	HNRNPAB	3182	Heterogeneous nuclear ribonucleoprotein A/B	+	-0.755032	8.57615	-18.4186	1.25149e-09	3.51101e-08
ENSG00000128951	P33316	P33316	DOWNREGULATED	DUT_HUMAN	DUT	1854	Deoxyuridine 5'-triphosphate nucleotidohydrolase, mitochondrial	+	-0.755062	6.65127	-16.3749	4.38643e-09	9.62391e-08
ENSG00000184967	Q9BVI4	Q9BVI4	DOWNREGULATED	NOC4L_HUMAN	NOC4L	79050	Nucleolar complex protein 4 homolog	+	-0.756148	3.8507	-3.18025	0.00873484	0.0196
ENSG00000153767	P29083	P29083	DOWNREGULATED	T2EA_HUMAN	GTF2E1	2960	General transcription factor IIE subunit 1	+	-0.760055	5.46066	-6.1681	6.95927e-05	0.000288136
ENSG00000075415	Q00325	Q00325	DOWNREGULATED	S25A3_HUMAN	SLC25A3	5250	Solute carrier family 25 member 3	+	-0.764201	10.1489	-22.4115	1.51601e-10	7.48382e-09
ENSG00000074201	P54105	P54105	DOWNREGULATED	ICLN_HUMAN	CLNS1A	1207	Methylosome subunit pICln	+	-0.765899	6.93306	-17.1462	2.68816e-09	6.73219e-08
ENSG00000104763	Q13510	Q13510	DOWNREGULATED	ASAH1_HUMAN	ASAH1	427	Acid ceramidase	+	-0.769967	6.53726	-14.5011	1.58504e-08	2.68568e-07
ENSG00000131503	Q8IWZ3	Q8IWZ3	DOWNREGULATED	ANKH1_HUMAN	ANKHD1	54882	Ankyrin repeat and KH domain-containing protein 1	+	-0.770171	4.19398	-12.9477	5.18444e-08	7.00445e-07
ENSG00000187239	Q96RU3	Q96RU3	DOWNREGULATED	FNBP1_HUMAN	FNBP1	23048	Formin-binding protein 1	+	-0.772501	3.89167	-2.69355	0.0208604	0.0414624
ENSG00000103187	Q14019	Q14019	DOWNREGULATED	COTL1_HUMAN	COTL1	23406	Coactosin-like protein	+	-0.777183	7.66893	-26.2417	2.74291e-11	2.3868e-09
ENSG00000137776	Q9NWH9	Q9NWH9	DOWNREGULATED	SLTM_HUMAN	SLTM	79811	SAFB-like transcription modulator	+	-0.77865	2.66554	-3.18736	0.00862486	0.0193786
ENSG00000221926	O95361	O95361;Q309B1	DOWNREGULATED	TRI16_HUMAN	TRIM16	10626	Tripartite motif-containing protein 16	+	-0.785956	6.32678	-32.9031	2.3328e-12	5.20721e-10
ENSG00000197771	Q9BTE3	Q9BTE3	DOWNREGULATED	MCMBP_HUMAN	MCMBP	79892	Mini-chromosome maintenance complex-binding protein	+	-0.788954	5.70282	-11.6941	1.48463e-07	1.62517e-06
ENSG00000104375	Q13188	Q13188	DOWNREGULATED	STK3_HUMAN	STK3	6788	Serine/threonine-protein kinase 3	+	-0.789142	3.73095	-3.04073	0.011206	0.0242955
#N/A	P34932;Q92598	P34932;Q92598	DOWNREGULATED	HS105_HUMAN;HSP74_HUMAN	HSPA4;HSPH1	#N/A	Heat shock 70 kDa protein 4	+	-0.789163	5.22479	-9.72176	9.6258e-07	7.59465e-06
ENSG00000196139	P42330	P42330	DOWNREGULATED	AK1C3_HUMAN	AKR1C3	8644	Aldo-keto reductase family 1 member C3	+	-0.791056	9.31863	-30.6383	5.08038e-12	8.42077e-10
ENSG00000076554	P55327	P55327	DOWNREGULATED	TPD52_HUMAN	TPD52	7163	Tumor protein D52	+	-0.792131	5.04995	-21.9379	1.90935e-10	8.67488e-09
ENSG00000114391	P83731	P83731	DOWNREGULATED	RL24_HUMAN	RPL24	6152	Large ribosomal subunit protein eL24	+	-0.793727	8.0096	-14.4527	1.64181e-08	2.74562e-07
ENSG00000161011	Q13501	Q13501	DOWNREGULATED	SQSTM_HUMAN	SQSTM1	8878	Sequestosome-1	+	-0.796104	6.57346	-13.4174	3.57673e-08	5.24433e-07
ENSG00000174953	Q9H2U1	Q9H2U1	DOWNREGULATED	DHX36_HUMAN	DHX36	170506	ATP-dependent DNA/RNA helicase DHX36	+	-0.798739	5.46116	-8.22456	4.94502e-06	3.03681e-05
ENSG00000143819	P07099	P07099	DOWNREGULATED	HYEP_HUMAN	EPHX1	2052	Epoxide hydrolase 1	+	-0.801753	8.7712	-25.0211	4.60013e-11	3.37387e-09
ENSG00000181163	P06748	P06748	DOWNREGULATED	NPM_HUMAN	NPM1	4869	Nucleophosmin	+	-0.802265	11.3142	-25.0824	4.47967e-11	3.33313e-09
ENSG00000112851	Q96RT1	Q96RT1	DOWNREGULATED	ERBIN_HUMAN	ERBIN	55914	Erbin	+	-0.805054	6.41865	-12.6555	6.57082e-08	8.39169e-07
ENSG00000130816	P26358	P26358	DOWNREGULATED	DNMT1_HUMAN	DNMT1	1786	DNA (cytosine-5)-methyltransferase 1	+	-0.807175	4.82007	-3.60354	0.00413	0.0101793
ENSG00000198053	P78324	P78324;Q9P1W8;Q5TFQ8	DOWNREGULATED	SHPS1_HUMAN	SIRPA	140885	Tyrosine-protein phosphatase non-receptor type substrate 1	+	-0.814502	5.9194	-15.762	6.57432e-09	1.30824e-07
ENSG00000130635	P20908	P20908	DOWNREGULATED	CO5A1_HUMAN	COL5A1	1289	Collagen alpha-1(V) chain	+	-0.829957	6.80776	-22.1003	1.76322e-10	8.30491e-09
ENSG00000183258	Q9UJV9	Q9UJV9	DOWNREGULATED	DDX41_HUMAN	DDX41	51428	Probable ATP-dependent RNA helicase DDX41	+	-0.830867	4.6856	-3.13956	0.00939238	0.0208656
ENSG00000080345	Q5UIP0	Q5UIP0	DOWNREGULATED	RIF1_HUMAN	RIF1	55183	Telomere-associated protein RIF1	+	-0.837338	5.40603	-7.5002	1.18474e-05	6.30305e-05
ENSG00000165732	Q9NR30	Q9NR30	DOWNREGULATED	DDX21_HUMAN	DDX21	9188	Nucleolar RNA helicase 2	+	-0.842447	6.1488	-15.364	8.61731e-09	1.63857e-07
ENSG00000070961	P20020	P20020	DOWNREGULATED	AT2B1_HUMAN	ATP2B1	490	Plasma membrane calcium-transporting ATPase 1	+	-0.844473	7.41569	-21.2008	2.76072e-10	1.11603e-08
ENSG00000206527	Q6Y1H2	Q6Y1H2	DOWNREGULATED	HACD2_HUMAN	HACD2	201562	Very-long-chain (3R)-3-hydroxyacyl-CoA dehydratase 2	+	-0.846243	4.43206	-4.67393	0.000674254	0.00209161
ENSG00000004478	Q02790	Q02790	DOWNREGULATED	FKBP4_HUMAN	FKBP4	2288	Peptidyl-prolyl cis-trans isomerase FKBP4	+	-0.85636	8.42016	-32.3606	2.7971e-12	5.74413e-10
ENSG00000113140	P09486	P09486	DOWNREGULATED	SPRC_HUMAN	SPARC	6678	SPARC	+	-0.859207	6.70397	-15.8366	6.25347e-09	1.26399e-07
ENSG00000075975	Q9H000	Q9H000	DOWNREGULATED	MKRN2_HUMAN	MKRN2	23609	E3 ubiquitin-protein ligase makorin-2	+	-0.860564	4.73883	-6.04766	8.26098e-05	0.000334849
ENSG00000110092	P24385	P24385	DOWNREGULATED	CCND1_HUMAN	CCND1	595	G1/S-specific cyclin-D1	+	-0.869023	4.58784	-2.72552	0.0197009	0.0394479
ENSG00000161813	Q71RC2	Q71RC2	DOWNREGULATED	LARP4_HUMAN	LARP4	113251	La-related protein 4	+	-0.870408	5.21512	-4.48366	0.000920825	0.00274178
ENSG00000120708	Q15582	Q15582	DOWNREGULATED	BGH3_HUMAN	TGFBI	7045	Transforming growth factor-beta-induced protein ig-h3	+	-0.87486	10.1442	-22.3076	1.59411e-10	7.79443e-09
ENSG00000105552	O15382	O15382	DOWNREGULATED	BCAT2_HUMAN	BCAT2	587	Branched-chain-amino-acid aminotransferase, mitochondrial	+	-0.87731	5.06467	-2.81268	0.0168551	0.0345307
ENSG00000171103	Q9BVS5	Q9BVS5	DOWNREGULATED	TR61B_HUMAN	TRMT61B	55006	tRNA (adenine(58)-N(1))-methyltransferase, mitochondrial	+	-0.88527	3.71949	-4.32113	0.00120632	0.0034872
ENSG00000146143	P49643	P49643	DOWNREGULATED	PRI2_HUMAN	PRIM2	5558	DNA primase large subunit	+	-0.888937	4.22307	-12.0482	1.09239e-07	1.25734e-06
ENSG00000127564	Q99640	Q99640	DOWNREGULATED	PMYT1_HUMAN	PKMYT1	9088	Membrane-associated tyrosine- and threonine-specific cdc2-inhibitory kinase	+	-0.890713	3.30577	-4.61985	0.000736337	0.00225289
ENSG00000075856	Q15020	Q15020	DOWNREGULATED	SART3_HUMAN	SART3	9733	Squamous cell carcinoma antigen recognized by T-cells 3	+	-0.891108	5.56667	-13.6434	3.00399e-08	4.53602e-07
ENSG00000130176	P51911	P51911	DOWNREGULATED	CNN1_HUMAN	CNN1	1264	Calponin-1	+	-0.891706	6.66914	-12.2181	9.4547e-08	1.11844e-06
ENSG00000162065	Q9ULP9	Q9ULP9	DOWNREGULATED	TBC24_HUMAN	TBC1D24	57465	TBC1 domain family member 24	+	-0.891884	3.65028	-3.27517	0.00737666	0.0169525
#N/A	P42330;P52895	P42330;P52895;Q04828	DOWNREGULATED	AK1C2_HUMAN;AK1C3_HUMAN	AKR1C2;AKR1C3	#N/A	Aldo-keto reductase family 1 member C3	+	-0.895582	8.12761	-22.4227	1.50789e-10	7.48382e-09
ENSG00000179151	Q96F86	Q96F86	DOWNREGULATED	EDC3_HUMAN	EDC3	80153	Enhancer of mRNA-decapping protein 3	+	-0.89825	4.7861	-2.76744	0.018277	0.0370593
#N/A	P55209;Q99733	P55209;Q99733	DOWNREGULATED	NP1L1_HUMAN;NP1L4_HUMAN	NAP1L1;NAP1L4	#N/A	Nucleosome assembly protein 1-like 1	+	-0.899222	8.45028	-23.3897	9.55145e-11	5.44967e-09
ENSG00000162706	Q8N126	Q8N126	DOWNREGULATED	CADM3_HUMAN	CADM3	57863	Cell adhesion molecule 3	+	-0.905651	4.51315	-3.18256	0.0086989	0.0195278
ENSG00000117228	P32455	P32455	DOWNREGULATED	GBP1_HUMAN	GBP1	2633	Guanylate-binding protein 1	+	-0.908922	7.32786	-22.2525	1.63728e-10	7.85587e-09
ENSG00000185787	Q9UBU8	Q9UBU8	DOWNREGULATED	MO4L1_HUMAN	MORF4L1	10933	Mortality factor 4-like protein 1	+	-0.915393	3.67148	-3.19152	0.00856108	0.0192859
ENSG00000166825	P15144	P15144	DOWNREGULATED	AMPN_HUMAN	ANPEP	290	Aminopeptidase N	+	-0.918092	7.30913	-24.8935	4.86245e-11	3.51603e-09
ENSG00000101019	Q9NVA1	Q9NVA1	DOWNREGULATED	UQCC1_HUMAN	UQCC1	55245	Ubiquinol-cytochrome-c reductase complex assembly factor 1	+	-0.921903	4.31127	-3.17185	0.00886666	0.019835
ENSG00000167325	P23921	P23921	DOWNREGULATED	RIR1_HUMAN	RRM1	6240	Ribonucleoside-diphosphate reductase large subunit	+	-0.922314	5.20843	-14.0123	2.27201e-08	3.56712e-07
ENSG00000070814	Q13428	Q13428	DOWNREGULATED	TCOF_HUMAN	TCOF1	6949	Treacle protein	+	-0.923711	6.01607	-16.7607	3.42452e-09	8.02047e-08
ENSG00000132361	O75153	O75153	DOWNREGULATED	CLU_HUMAN	CLUH	23277	Clustered mitochondria protein homolog	+	-0.928629	5.70938	-23.8064	7.88912e-11	4.93936e-09
ENSG00000113657	Q14195	Q14195	DOWNREGULATED	DPYL3_HUMAN	DPYSL3	1809	Dihydropyrimidinase-related protein 3	+	-0.930563	8.98376	-37.5122	5.56353e-13	2.04023e-10
ENSG00000128872	Q9NZR1	Q9NZR1	DOWNREGULATED	TMOD2_HUMAN	TMOD2	29767	Tropomodulin-2	+	-0.930939	5.93515	-4.8479	0.000509286	0.00162807
ENSG00000177425	Q96IZ0	Q96IZ0	DOWNREGULATED	PAWR_HUMAN	PAWR	5074	PRKC apoptosis WT1 regulator protein	+	-0.938145	6.12564	-13.9751	2.33626e-08	3.61648e-07
ENSG00000110721	P35790	P35790	DOWNREGULATED	CHKA_HUMAN	CHKA	1119	Choline kinase alpha	+	-0.940184	6.22599	-13.7509	2.76738e-08	4.22849e-07
ENSG00000196083	Q9NPH3	Q9NPH3	DOWNREGULATED	IL1AP_HUMAN	IL1RAP	3556	Interleukin-1 receptor accessory protein	+	-0.943241	5.1701	-8.9257	2.2377e-06	1.51962e-05
#N/A	O95757;Q92598	Q92598;O95757	DOWNREGULATED	HS105_HUMAN;HS74L_HUMAN	HSPA4L;HSPH1	#N/A	Heat shock 70 kDa protein 4L	+	-0.952843	7.60583	-14.8121	1.26774e-08	2.19884e-07
ENSG00000148719	Q9NXW2	Q9NXW2	DOWNREGULATED	DJB12_HUMAN	DNAJB12	54788	DnaJ homolog subfamily B member 12	+	-0.956503	3.91124	-3.40767	0.0058317	0.0138291
#N/A	O95678;P02538;P04259;P05787;P08670;P08729;P13647;P14136;P78386;Q14533;Q8N1N4	O43790;O95678;P02538;P04259;P05787;P08670;P08729;P12035;P13647;P14136;P48668;P78385;P78386;Q01546;Q14533;Q5XKE5;Q8N1N4;Q9NSB2	DOWNREGULATED	GFAP_HUMAN;K2C5_HUMAN;K2C6A_HUMAN;K2C6B_HUMAN;K2C75_HUMAN;K2C78_HUMAN;K2C7_HUMAN;K2C8_HUMAN;KRT81_HUMAN;KRT85_HUMAN;VIME_HUMAN	GFAP;KRT5;KRT6A;KRT6B;KRT7;KRT75;KRT78;KRT8;KRT81;KRT85;VIM	#N/A	Keratin, type II cytoskeletal 75	+	-0.957312	9.87531	-20.1472	4.77978e-10	1.68078e-08
ENSG00000181019	P15559	P15559	DOWNREGULATED	NQO1_HUMAN	NQO1	1728	NAD(P)H dehydrogenase [quinone] 1	+	-0.958099	6.17183	-20.6875	3.59507e-10	1.3774e-08
ENSG00000080819	P36551	P36551	DOWNREGULATED	HEM6_HUMAN	CPOX	1371	Oxygen-dependent coproporphyrinogen-III oxidase, mitochondrial	+	-0.959157	7.60833	-28.833	9.84779e-12	1.20378e-09
ENSG00000079616	Q14807	Q14807	DOWNREGULATED	KIF22_HUMAN	KIF22	3835	Kinesin-like protein KIF22	+	-0.961485	4.50008	-7.63315	1.00477e-05	5.47608e-05
ENSG00000167815	P32119	P32119	DOWNREGULATED	PRDX2_HUMAN	PRDX2	7001	Peroxiredoxin-2	+	-0.963752	8.41137	-21.4296	2.45897e-10	1.03899e-08
ENSG00000151632	P52895	P52895;Q04828	DOWNREGULATED	AK1C2_HUMAN	AKR1C2	1646	Aldo-keto reductase family 1 member C2	+	-0.96499	8.58874	-25.9091	3.15053e-11	2.60884e-09
ENSG00000167900	P04183	P04183	DOWNREGULATED	KITH_HUMAN	TK1	7083	Thymidine kinase, cytosolic	+	-0.967191	6.58248	-26.9575	2.04734e-11	1.98322e-09
ENSG00000146247	Q8WWQ0	Q8WWQ0	DOWNREGULATED	PHIP_HUMAN	PHIP	55023	PH-interacting protein	+	-0.969095	3.15642	-2.76142	0.018475	0.0374018
ENSG00000096063	Q96SB4	Q96SB4	DOWNREGULATED	SRPK1_HUMAN	SRPK1	6732	SRSF protein kinase 1	+	-0.969258	3.61068	-4.53492	0.000846254	0.00255569
ENSG00000113758	Q16643	Q16643	DOWNREGULATED	DREB_HUMAN	DBN1	1627	Drebrin	+	-0.970466	7.04206	-26.0717	2.94364e-11	2.47748e-09
ENSG00000113272	Q9NWX6	Q9NWX6	DOWNREGULATED	THG1_HUMAN	THG1L	54974	Probable tRNA(His) guanylyltransferase	+	-0.973477	4.65451	-6.25037	6.19705e-05	0.00026057
ENSG00000101911	P11908	P11908	DOWNREGULATED	PRPS2_HUMAN	PRPS2	5634	Ribose-phosphate pyrophosphokinase 2	+	-0.983836	5.42139	-8.7725	2.64994e-06	1.76685e-05
ENSG00000148773	P46013	P46013	DOWNREGULATED	KI67_HUMAN	MKI67	4288	Proliferation marker protein Ki-67	+	-0.996469	5.60968	-6.63081	3.66713e-05	0.000167352
ENSG00000103591	Q6PD74	Q6PD74	DOWNREGULATED	AAGAB_HUMAN	AAGAB	79719	Alpha- and gamma-adaptin-binding protein p34	+	-0.997352	4.92542	-3.99514	0.00209466	0.00562447
ENSG00000086061	P31689	P31689	DOWNREGULATED	DNJA1_HUMAN	DNAJA1	3301	DnaJ homolog subfamily A member 1	+	-0.998847	7.2199	-27.0157	1.99989e-11	1.9745e-09
ENSG00000206172	P69905	P69905	DOWNREGULATED	HBA_HUMAN	HBA1	3039	Hemoglobin subunit alpha	+	-1.00253	10.183	-6.25979	6.11563e-05	0.000258204
ENSG00000134590	A6ZKI3	A6ZKI3;Q17RB0	DOWNREGULATED	RTL8C_HUMAN	RTL8C	8933	Retrotransposon Gag-like protein 8C	+	-1.00552	3.03101	-3.03046	0.0114138	0.0246685
ENSG00000165055	Q6P1Q9	Q6P1Q9	DOWNREGULATED	MET2B_HUMAN	METTL2B	55798	tRNA N(3)-methylcytidine methyltransferase METTL2B	+	-1.00786	3.79136	-3.07136	0.0106089	0.0231671
ENSG00000139329	P51884	P51884	DOWNREGULATED	LUM_HUMAN	LUM	4060	Lumican	+	-1.0086	6.29928	-13.1612	4.3731e-08	6.08442e-07
ENSG00000112984	O95235	O95235	DOWNREGULATED	KI20A_HUMAN	KIF20A	10112	Kinesin-like protein KIF20A	+	-1.01085	3.94232	-4.61115	0.000746882	0.00227972
ENSG00000158769	Q9Y624	Q9Y624	DOWNREGULATED	JAM1_HUMAN	F11R	50848	Junctional adhesion molecule A	+	-1.011	4.88661	-2.59905	0.0246971	0.0479376
#N/A	P31350;Q7LG56	P31350;Q7LG56	DOWNREGULATED	RIR2B_HUMAN;RIR2_HUMAN	RRM2;RRM2B	#N/A	Ribonucleoside-diphosphate reductase subunit M2	+	-1.01133	6.83255	-12.4029	8.0964e-08	9.92051e-07
ENSG00000187109	P55209	P55209	DOWNREGULATED	NP1L1_HUMAN	NAP1L1	4673	Nucleosome assembly protein 1-like 1	+	-1.01299	10.4117	-25.5475	3.66999e-11	2.89873e-09
ENSG00000120694	Q92598	Q92598	DOWNREGULATED	HS105_HUMAN	HSPH1	10808	Heat shock protein 105 kDa	+	-1.01358	8.55204	-30.636	5.08461e-12	8.42077e-10
ENSG00000050748	P45984	P45984	DOWNREGULATED	MK09_HUMAN	MAPK9	5601	Mitogen-activated protein kinase 9	+	-1.01923	3.85607	-3.13267	0.00950865	0.0210597
ENSG00000142871	O00622	O00622	DOWNREGULATED	CCN1_HUMAN	CCN1	3491	CCN family member 1	+	-1.01958	9.04578	-6.52958	4.20865e-05	0.000188544
ENSG00000164307	Q9NZ08	Q9NZ08	DOWNREGULATED	ERAP1_HUMAN	ERAP1	51752	Endoplasmic reticulum aminopeptidase 1	+	-1.02822	7.33319	-29.4226	7.89913e-12	1.04743e-09
ENSG00000205981	Q96DA6	Q96DA6	DOWNREGULATED	TIM14_HUMAN	DNAJC19	131118	Mitochondrial import inner membrane translocase subunit TIM14	+	-1.02993	4.80318	-2.74007	0.0191945	0.0385845
ENSG00000168765	Q03013	Q03013	DOWNREGULATED	GSTM4_HUMAN	GSTM4	2948	Glutathione S-transferase Mu 4	+	-1.03058	3.69815	-2.68916	0.0210248	0.0417569
#N/A	P05787;P08670;P08729	P05787;P08670;P08729;P17661;P41219;Q9NSB2	DOWNREGULATED	K2C7_HUMAN;K2C8_HUMAN;VIME_HUMAN	KRT7;KRT8;VIM	#N/A	Keratin, type II cytoskeletal 8	+	-1.03287	10.3049	-23.7097	8.24486e-11	5.03918e-09
ENSG00000116761	P32929	P32929	DOWNREGULATED	CGL_HUMAN	CTH	1491	Cystathionine gamma-lyase	+	-1.03385	7.22171	-30.637	5.0827e-12	8.42077e-10
ENSG00000237649	Q9BW19	Q9BW19	DOWNREGULATED	KIFC1_HUMAN	KIFC1	3833	Kinesin-like protein KIFC1	+	-1.03658	4.42952	-3.71084	0.00342364	0.00867999
ENSG00000164162	Q9UM13	Q9UM13	DOWNREGULATED	APC10_HUMAN	ANAPC10	10393	Anaphase-promoting complex subunit 10	+	-1.04058	3.18022	-3.34627	0.0065017	0.015152
ENSG00000173193	Q460N5	Q460N5	DOWNREGULATED	PAR14_HUMAN	PARP14	54625	Protein mono-ADP-ribosyltransferase PARP14	+	-1.04171	4.48163	-3.19507	0.00850715	0.0191897
ENSG00000183624	Q96FZ2	Q96FZ2	DOWNREGULATED	HMCES_HUMAN	HMCES	56941	Abasic site processing protein HMCES	+	-1.04965	4.27867	-4.31406	0.00122068	0.00351904
ENSG00000130787	O75146	O75146	DOWNREGULATED	HIP1R_HUMAN	HIP1R	9026	Huntingtin-interacting protein 1-related protein	+	-1.0533	3.69618	-2.85236	0.015699	0.0324081
ENSG00000141568	Q01167	Q01167	DOWNREGULATED	FOXK2_HUMAN	FOXK2	3607	Forkhead box protein K2	+	-1.06073	3.9173	-3.04083	0.0112041	0.0242955
ENSG00000144724	P23470	P23470	DOWNREGULATED	PTPRG_HUMAN	PTPRG	5793	Receptor-type tyrosine-protein phosphatase gamma	+	-1.06115	3.35593	-3.37542	0.00617437	0.0145143
ENSG00000168078	Q96KB5	Q96KB5	DOWNREGULATED	TOPK_HUMAN	PBK	55872	Lymphokine-activated killer T-cell-originated protein kinase	+	-1.07027	6.48484	-11.3129	2.08447e-07	2.17957e-06
ENSG00000198420	Q9Y4C2	Q9Y4C2	DOWNREGULATED	TCAF1_HUMAN	TCAF1	9747	TRPM8 channel-associated factor 1	+	-1.07214	4.88607	-3.2475	0.00774876	0.0176652
ENSG00000123562	Q15014	Q15014	DOWNREGULATED	MO4L2_HUMAN	MORF4L2	9643	Mortality factor 4-like protein 2	+	-1.0793	3.80077	-2.99281	0.012209	0.0261389
ENSG00000185753	Q8TB03	Q8TB03	DOWNREGULATED	CX038_HUMAN	CXorf38	159013	Uncharacterized protein CXorf38	+	-1.08441	3.30798	-2.60222	0.0245577	0.0477004
ENSG00000077152	Q9NPD8	Q9NPD8	DOWNREGULATED	UBE2T_HUMAN	UBE2T	29089	Ubiquitin-conjugating enzyme E2 T	+	-1.09215	5.07918	-9.36675	1.39239e-06	1.04358e-05
ENSG00000085224	P46100	P46100	DOWNREGULATED	ATRX_HUMAN	ATRX	546	Transcriptional regulator ATRX	+	-1.09968	4.03341	-3.90171	0.00245931	0.00647824
ENSG00000048392	Q7LG56	Q7LG56	DOWNREGULATED	RIR2B_HUMAN	RRM2B	50484	Ribonucleoside-diphosphate reductase subunit M2 B	+	-1.10105	3.61867	-3.84663	0.0027046	0.00703415
ENSG00000242114	Q9UDX5	Q9UDX5	DOWNREGULATED	MTFP1_HUMAN	MTFP1	51537	Mitochondrial fission process protein 1	+	-1.10258	4.67839	-2.93755	0.0134782	0.0284284
ENSG00000116871	Q3KQU3	Q3KQU3	DOWNREGULATED	MA7D1_HUMAN	MAP7D1	55700	MAP7 domain-containing protein 1	+	-1.11028	6.09526	-19.898	5.46388e-10	1.8701e-08
ENSG00000164176	O43854	O43854	DOWNREGULATED	EDIL3_HUMAN	EDIL3	10085	EGF-like repeat and discoidin I-like domain-containing protein 3	+	-1.11328	6.23502	-20.1945	4.66055e-10	1.65015e-08
ENSG00000169359	O00400	O00400	DOWNREGULATED	ACATN_HUMAN	SLC33A1	9197	Acetyl-coenzyme A transporter 1	+	-1.11917	3.99439	-3.27474	0.00738228	0.0169549
ENSG00000091164	O43396	O43396	DOWNREGULATED	TXNL1_HUMAN	TXNL1	9352	Thioredoxin-like protein 1	+	-1.13318	6.69531	-32.7665	2.44123e-12	5.22221e-10
ENSG00000182481	P52292	P52292	DOWNREGULATED	IMA1_HUMAN	KPNA2	3838	Importin subunit alpha-1	+	-1.13481	8.37197	-19.9523	5.30614e-10	1.84066e-08
ENSG00000136436	Q13137	Q13137	DOWNREGULATED	CACO2_HUMAN	CALCOCO2	10241	Calcium-binding and coiled-coil domain-containing protein 2	+	-1.13608	4.0534	-3.81671	0.00284832	0.0073706
#N/A	P0DMV8;P0DMV9	P0DMV8;P0DMV9	DOWNREGULATED	HS71A_HUMAN;HS71B_HUMAN	HSPA1A;HSPA1B	#N/A	Heat shock 70 kDa protein 1A	+	-1.13848	10.8629	-28.0685	1.31948e-11	1.43294e-09
ENSG00000284194	O43819	O43819	DOWNREGULATED	SCO2_HUMAN	SCO2	9997	Protein SCO2 homolog, mitochondrial	+	-1.1404	3.83615	-3.03009	0.0114213	0.0246685
ENSG00000204390	P34931	P0DMV8;P0DMV9;P34931	DOWNREGULATED	HS71L_HUMAN	HSPA1L	3305	Heat shock 70 kDa protein 1-like	+	-1.14909	11.6581	-30.3237	5.68565e-12	9.12191e-10
ENSG00000146918	Q86XI2	Q86XI2	DOWNREGULATED	CNDG2_HUMAN	NCAPG2	54892	Condensin-2 complex subunit G2	+	-1.14977	3.62906	-2.74754	0.0189398	0.0381471
ENSG00000149257	P50454	P50454	DOWNREGULATED	SERPH_HUMAN	SERPINH1	871	Serpin H1	+	-1.16968	10.8918	-33.1873	2.12363e-12	4.95579e-10
ENSG00000171848	P31350	P31350	DOWNREGULATED	RIR2_HUMAN	RRM2	6241	Ribonucleoside-diphosphate reductase subunit M2	+	-1.18148	7.14954	-26.5352	2.43065e-11	2.18929e-09
ENSG00000143179	Q9BZX2	Q9BZX2;Q9HA47	DOWNREGULATED	UCK2_HUMAN	UCK2	7371	Uridine-cytidine kinase 2	+	-1.19165	4.7369	-5.66035	0.000145348	0.000549495
ENSG00000113621	Q96J42	Q96J42	DOWNREGULATED	TXD15_HUMAN	TXNDC15	79770	Thioredoxin domain-containing protein 15	+	-1.19589	3.64686	-3.01501	0.0117335	0.0252789
ENSG00000205726	Q15811	Q15811	DOWNREGULATED	ITSN1_HUMAN	ITSN1	6453	Intersectin-1	+	-1.19752	4.03809	-2.83829	0.0160997	0.0331153
ENSG00000133704	O15397	O15397	DOWNREGULATED	IPO8_HUMAN	IPO8	10526	Importin-8	+	-1.20178	5.27148	-7.34755	1.43512e-05	7.38929e-05
ENSG00000113790	Q08426	Q08426	DOWNREGULATED	ECHP_HUMAN	EHHADH	1962	Peroxisomal bifunctional enzyme	+	-1.22329	5.02229	-3.94674	0.00227598	0.00605435
ENSG00000149196	Q53FT3	Q53FT3	DOWNREGULATED	HIKES_HUMAN	HIKESHI	51501	Protein Hikeshi	+	-1.22348	3.66344	-4.30182	0.00124595	0.00357345
ENSG00000117399	Q12834	Q12834	DOWNREGULATED	CDC20_HUMAN	CDC20	991	Cell division cycle protein 20 homolog	+	-1.22416	3.60676	-2.74029	0.0191871	0.0385845
#N/A	P0DMV8;P0DMV9;P17066	P0DMV8;P0DMV9;P17066;P48741	DOWNREGULATED	HS71A_HUMAN;HS71B_HUMAN;HSP76_HUMAN	HSPA1A;HSPA1B;HSPA6	#N/A	Heat shock 70 kDa protein 1A	+	-1.22438	10.0326	-40.1442	2.64774e-13	1.47596e-10
ENSG00000159259	Q13112	Q13112	DOWNREGULATED	CAF1B_HUMAN	CHAF1B	8208	Chromatin assembly factor 1 subunit B	+	-1.22581	4.44673	-2.68153	0.0213134	0.0422319
ENSG00000186416	O15226	O15226	DOWNREGULATED	NKRF_HUMAN	NKRF	55922	NF-kappa-B-repressing factor	+	-1.22799	3.1289	-3.67057	0.0036729	0.0092299
ENSG00000011376	Q15031	Q15031	DOWNREGULATED	SYLM_HUMAN	LARS2	23395	Leucine--tRNA ligase, mitochondrial	+	-1.22842	3.4045	-4.49115	0.000909513	0.00271953
ENSG00000184992	Q8WY22	Q8WY22	DOWNREGULATED	BRI3B_HUMAN	BRI3BP	140707	BRI3-binding protein	+	-1.22913	3.91368	-5.21112	0.000287401	0.000984335
ENSG00000135776	Q9NRK6	Q9NRK6	DOWNREGULATED	ABCBA_HUMAN	ABCB10	23456	ATP-binding cassette sub-family B member 10, mitochondrial	+	-1.23299	3.09646	-4.11019	0.00172143	0.00474385
ENSG00000120802	P42166	P42166	DOWNREGULATED	LAP2A_HUMAN	TMPO	7112	Lamina-associated polypeptide 2, isoform alpha	+	-1.23426	6.80623	-22.2082	1.67292e-10	7.95256e-09
ENSG00000102317	P98179	P98179	DOWNREGULATED	RBM3_HUMAN	RBM3	5935	RNA-binding protein 3	+	-1.23911	8.0747	-15.9085	5.96038e-09	1.22894e-07
ENSG00000161956	Q9H4L4	Q9H4L4	DOWNREGULATED	SENP3_HUMAN	SENP3	26168	Sentrin-specific protease 3	+	-1.24258	4.47621	-2.89651	0.0145058	0.0302612
ENSG00000104611	Q9H788	Q9H788	DOWNREGULATED	SH24A_HUMAN	SH2D4A	63898	SH2 domain-containing protein 4A	+	-1.24488	4.08358	-4.27624	0.00130053	0.00371352
ENSG00000132466	O75179	O75179	DOWNREGULATED	ANR17_HUMAN	ANKRD17	26057	Ankyrin repeat domain-containing protein 17	+	-1.25087	3.83468	-3.60664	0.00410764	0.0101436
#N/A	P00352;P05091;P30837	O94788;P00352;P05091;P30837;P47895	DOWNREGULATED	AL1A1_HUMAN;AL1B1_HUMAN;ALDH2_HUMAN	ALDH1A1;ALDH1B1;ALDH2	#N/A	Aldehyde dehydrogenase 1A1	+	-1.26542	6.59017	-17.3701	2.34099e-09	6.00931e-08
ENSG00000183048	Q9UBX3	Q9UBX3	DOWNREGULATED	DIC_HUMAN	SLC25A10	1468	Mitochondrial dicarboxylate carrier	+	-1.26782	6.00236	-29.082	8.96743e-12	1.1229e-09
ENSG00000085788	O94830	O94830	DOWNREGULATED	DDHD2_HUMAN	DDHD2	23259	Phospholipase DDHD2	+	-1.27192	3.25574	-2.80646	0.0170438	0.0348479
ENSG00000133243	Q9BX70	Q9BX70	DOWNREGULATED	BTBD2_HUMAN	BTBD2	55643	BTB/POZ domain-containing protein 2	+	-1.27966	3.44729	-3.60476	0.00412119	0.0101699
ENSG00000228716	P00374	P00374	DOWNREGULATED	DYR_HUMAN	DHFR	1719	Dihydrofolate reductase	+	-1.29491	6.07218	-21.2294	2.72083e-10	1.10863e-08
ENSG00000276043	Q96T88	Q96T88	DOWNREGULATED	UHRF1_HUMAN	UHRF1	29128	E3 ubiquitin-protein ligase UHRF1	+	-1.2952	5.08069	-4.92899	0.000447492	0.00145191
ENSG00000055147	Q9NRY5	Q9NRY5	DOWNREGULATED	F1142_HUMAN	FAM114A2	10827	Protein FAM114A2	+	-1.29551	4.0933	-3.8625	0.00263142	0.00686361
ENSG00000149639	O94964	O94964	DOWNREGULATED	SOGA1_HUMAN	SOGA1	140710	Protein SOGA1	+	-1.29852	3.78917	-2.93576	0.0135214	0.0284853
ENSG00000140284	O14975	O14975	DOWNREGULATED	S27A2_HUMAN	SLC27A2	11001	Long-chain fatty acid transport protein 2	+	-1.30041	3.31891	-2.66614	0.0219082	0.0432436
ENSG00000139410	Q96GA7	Q96GA7	DOWNREGULATED	SDSL_HUMAN	SDSL	113675	Serine dehydratase-like	+	-1.32113	3.95714	-4.48399	0.000920321	0.00274178
ENSG00000101003	Q14691	Q14691	DOWNREGULATED	PSF1_HUMAN	GINS1	9837	DNA replication complex GINS protein PSF1	+	-1.3553	3.87806	-5.73661	0.000129832	0.000498174
ENSG00000163808	Q9NS87	Q9NS87	DOWNREGULATED	KIF15_HUMAN	KIF15	56992	Kinesin-like protein KIF15	+	-1.35538	3.69687	-2.58732	0.0252194	0.0487343
ENSG00000155189	Q9NUQ2	Q9NUQ2	DOWNREGULATED	PLCE_HUMAN	AGPAT5	55326	1-acyl-sn-glycerol-3-phosphate acyltransferase epsilon	+	-1.37264	4.61312	-2.99772	0.012102	0.0259315
ENSG00000134013	Q9Y4K0	Q9Y4K0	DOWNREGULATED	LOXL2_HUMAN	LOXL2	4017	Lysyl oxidase homolog 2	+	-1.3736	4.33705	-3.16726	0.00893944	0.0199805
ENSG00000085511	Q9Y6R4	Q9Y6R4	DOWNREGULATED	M3K4_HUMAN	MAP3K4	4216	Mitogen-activated protein kinase kinase kinase 4	+	-1.3884	4.60087	-3.42881	0.0056177	0.0133772
ENSG00000168288	Q9H3L0	Q9H3L0	DOWNREGULATED	MMAD_HUMAN	MMADHC	27249	Cobalamin trafficking protein CblD	+	-1.40309	4.87707	-2.96249	0.0128896	0.0273903
ENSG00000130203	P02649	P02649	DOWNREGULATED	APOE_HUMAN	APOE	348	Apolipoprotein E	+	-1.40468	5.60225	-4.57719	0.00078955	0.00240139
ENSG00000011028	Q9UBG0	Q9UBG0	DOWNREGULATED	MRC2_HUMAN	MRC2	9902	C-type mannose receptor 2	+	-1.40914	6.94735	-35.3141	1.07707e-12	3.45604e-10
ENSG00000168724	Q5F1R6	Q5F1R6	DOWNREGULATED	DJC21_HUMAN	DNAJC21	134218	DnaJ homolog subfamily C member 21	+	-1.41778	3.38062	-3.91622	0.0023986	0.00633783
ENSG00000034713	P60520	P60520	DOWNREGULATED	GBRL2_HUMAN	GABARAPL2	11345	Gamma-aminobutyric acid receptor-associated protein-like 2	+	-1.42217	4.36868	-4.70725	0.000638765	0.00199236
ENSG00000133048	P36222	P36222	DOWNREGULATED	CH3L1_HUMAN	CHI3L1	1116	Chitinase-3-like protein 1	+	-1.42431	6.86189	-16.6803	3.60427e-09	8.28194e-08
ENSG00000218336	Q9P273	Q9P273	DOWNREGULATED	TEN3_HUMAN	TENM3	55714	Teneurin-3	+	-1.44078	4.91206	-6.44685	4.71481e-05	0.000206888
ENSG00000104626	Q8IV48	Q8IV48	DOWNREGULATED	ERI1_HUMAN	ERI1	90459	3'-5' exoribonuclease 1	+	-1.44294	3.53095	-3.8443	0.0027155	0.00705893
ENSG00000111845	Q9NWT1	Q9NWT1	DOWNREGULATED	PK1IP_HUMAN	PAK1IP1	55003	p21-activated protein kinase-interacting protein 1	+	-1.45039	3.7563	-4.5156	0.000873584	0.00262386
ENSG00000176890	P04818	P04818	DOWNREGULATED	TYSY_HUMAN	TYMS	7298	Thymidylate synthase	+	-1.4803	6.29717	-16.8273	3.28304e-09	7.73171e-08
ENSG00000087263	Q8N543	Q8N543	DOWNREGULATED	OGFD1_HUMAN	OGFOD1	55239	Prolyl 3-hydroxylase OGFOD1	+	-1.48226	4.10642	-2.81789	0.0166987	0.034265
ENSG00000040275	Q96EA4	Q96EA4	DOWNREGULATED	SPDLY_HUMAN	SPDL1	54908	Protein Spindly	+	-1.49135	4.25664	-3.90978	0.00242535	0.00639536
ENSG00000156802	Q6PL18	Q6PL18	DOWNREGULATED	ATAD2_HUMAN	ATAD2	29028	ATPase family AAA domain-containing protein 2	+	-1.50855	3.50768	-4.1134	0.00171208	0.00472063
ENSG00000196428	O75157	O75157	DOWNREGULATED	T22D2_HUMAN	TSC22D2	9819	TSC22 domain family protein 2	+	-1.53343	4.21851	-2.84213	0.0159894	0.0329413
ENSG00000108821	P02452	P02452	DOWNREGULATED	CO1A1_HUMAN	COL1A1	1277	Collagen alpha-1(I) chain	+	-1.53869	7.66681	-16.1717	5.00837e-09	1.06683e-07
ENSG00000116649	P19623	P19623	DOWNREGULATED	SPEE_HUMAN	SRM	6723	Spermidine synthase	+	-1.54483	7.67665	-39.8437	2.87488e-13	1.47596e-10
ENSG00000134369	Q8NEY1	Q8NEY1	DOWNREGULATED	NAV1_HUMAN	NAV1	89796	Neuron navigator 1	+	-1.54579	4.47719	-3.41086	0.00579885	0.0137639
ENSG00000166881	O14524	O14524	DOWNREGULATED	NEMP1_HUMAN	NEMP1	23306	Nuclear envelope integral membrane protein 1	+	-1.54724	3.91048	-5.97348	9.19028e-05	0.000366896
ENSG00000137124	P30837	P30837	DOWNREGULATED	AL1B1_HUMAN	ALDH1B1	219	Aldehyde dehydrogenase X, mitochondrial	+	-1.55127	6.64299	-50.2173	2.27208e-14	2.05828e-11
ENSG00000137876	Q9UHA3	Q9UHA3	DOWNREGULATED	RLP24_HUMAN	RSL24D1	51187	Probable ribosome biogenesis protein RLP24	+	-1.55522	4.32549	-3.48317	0.00510361	0.0123129
ENSG00000106348	P20839	P20839	DOWNREGULATED	IMDH1_HUMAN	IMPDH1	3614	Inosine-5'-monophosphate dehydrogenase 1	+	-1.55883	5.89918	-8.45923	3.77145e-06	2.41128e-05
ENSG00000198585	Q96DE0	Q96DE0	DOWNREGULATED	NUD16_HUMAN	NUDT16	131870	U8 snoRNA-decapping enzyme	+	-1.56377	4.48703	-3.65085	0.00380167	0.00951085
ENSG00000156970	O60566	O60566	DOWNREGULATED	BUB1B_HUMAN	BUB1B	701	Mitotic checkpoint serine/threonine-protein kinase BUB1 beta	+	-1.5753	3.64815	-4.0286	0.00197814	0.00535076
ENSG00000171992	Q8N3V7	Q8N3V7	DOWNREGULATED	SYNPO_HUMAN	SYNPO	11346	Synaptopodin	+	-1.57773	3.75285	-5.40753	0.000212575	0.000758415
ENSG00000161202	Q92997	Q92997	DOWNREGULATED	DVL3_HUMAN	DVL3	1857	Segment polarity protein dishevelled homolog DVL-3	+	-1.60861	3.97876	-10.409	4.85412e-07	4.34922e-06
ENSG00000079215	P43003	P43003	DOWNREGULATED	EAA1_HUMAN	SLC1A3	6507	Excitatory amino acid transporter 1	+	-1.61097	3.59807	-6.68707	3.39882e-05	0.000157487
ENSG00000132561	O00339	O00339	DOWNREGULATED	MATN2_HUMAN	MATN2	4147	Matrilin-2	+	-1.65886	3.48249	-4.28261	0.00128672	0.00367818
ENSG00000099282	O95858	O95858	DOWNREGULATED	TSN15_HUMAN	TSPAN15	23555	Tetraspanin-15	+	-1.66649	4.51513	-5.73949	0.000129281	0.000496431
ENSG00000145681	P10915	P10915	DOWNREGULATED	HPLN1_HUMAN	HAPLN1	1404	Hyaluronan and proteoglycan link protein 1	+	-1.67396	8.24287	-34.0631	1.59763e-12	4.41944e-10
#N/A	Q12800;Q9NZI7	Q12800;Q9NZI7	DOWNREGULATED	TFCP2_HUMAN;UBIP1_HUMAN	TFCP2;UBP1	#N/A	Alpha-globin transcription factor CP2	+	-1.68092	3.79607	-2.85236	0.0156991	0.0324081
ENSG00000132541	P52758	P52758	DOWNREGULATED	RIDA_HUMAN	RIDA	10247	2-iminobutanoate/2-iminopropanoate deaminase	+	-1.69026	3.80611	-7.01634	2.19646e-05	0.000106115
ENSG00000288701	Q5JSZ5	Q5JSZ5	DOWNREGULATED	PRC2B_HUMAN	PRRC2B	84726	Protein PRRC2B	+	-1.70183	3.46762	-5.11669	0.000332893	0.00111783
ENSG00000135446	P11802	P11802	DOWNREGULATED	CDK4_HUMAN	CDK4	1019	Cyclin-dependent kinase 4	+	-1.70191	4.36142	-4.01892	0.00201115	0.00542577
ENSG00000133110	Q15063	Q15063	DOWNREGULATED	POSTN_HUMAN	POSTN	10631	Periostin	+	-1.70688	3.89581	-3.01466	0.0117408	0.0252842
#N/A	Q86UW8;Q96S86	Q86UW8;Q96S86	DOWNREGULATED	HPLN3_HUMAN;HPLN4_HUMAN	HAPLN3;HAPLN4	#N/A	Hyaluronan and proteoglycan link protein 4	+	-1.72186	7.41607	-28.4489	1.13961e-11	1.30017e-09
ENSG00000182253	O15061	O15061	DOWNREGULATED	SYNEM_HUMAN	SYNM	23336	Synemin	+	-1.7339	4.28729	-5.39146	0.000217839	0.00077504
ENSG00000165264	O95139	O95139	DOWNREGULATED	NDUB6_HUMAN	NDUFB6	4712	NADH dehydrogenase [ubiquinone] 1 beta subcomplex subunit 6	+	-1.74336	5.39477	-2.60566	0.0244072	0.0474826
ENSG00000164879	P07451	P07451	DOWNREGULATED	CAH3_HUMAN	CA3	761	Carbonic anhydrase 3	+	-1.74664	4.761	-5.61067	0.000156511	0.000585233
ENSG00000101868	P09884	P09884	DOWNREGULATED	DPOLA_HUMAN	POLA1	5422	DNA polymerase alpha catalytic subunit	+	-1.74771	3.85886	-5.564	0.000167829	0.000621221
ENSG00000021762	Q9H0X9	Q9H0X9	DOWNREGULATED	OSBL5_HUMAN	OSBPL5	114879	Oxysterol-binding protein-related protein 5	+	-1.75016	4.12519	-4.60141	0.000758861	0.00231179
ENSG00000135919	P07093	P07093	DOWNREGULATED	GDN_HUMAN	SERPINE2	5270	Glia-derived nexin	+	-1.76017	6.42438	-29.403	7.95668e-12	1.04743e-09
ENSG00000144642	Q6XE24	Q6XE24	DOWNREGULATED	RBMS3_HUMAN	RBMS3	27303	RNA-binding motif, single-stranded-interacting protein 3	+	-1.77228	4.68947	-4.31301	0.00122282	0.00351904
ENSG00000164292	O94955	O94955	DOWNREGULATED	RHBT3_HUMAN	RHOBTB3	22836	Rho-related BTB domain-containing protein 3	+	-1.77348	3.30581	-5.75692	0.000126003	0.000486026
ENSG00000135821	P15104	P15104	DOWNREGULATED	GLNA_HUMAN	GLUL	2752	Glutamine synthetase	+	-1.78108	4.5027	-4.17752	0.0015358	0.00430157
ENSG00000168542	P02461	P02461	DOWNREGULATED	CO3A1_HUMAN	COL3A1	1281	Collagen alpha-1(III) chain	+	-1.80198	4.69461	-3.60883	0.00409187	0.0101144
ENSG00000171241	Q8NEM2	Q8NEM2	DOWNREGULATED	SHCBP_HUMAN	SHCBP1	79801	SHC SH2 domain-binding protein 1	+	-1.80304	3.87614	-4.10972	0.0017228	0.0047451
ENSG00000169371	O95149	O95149	DOWNREGULATED	SPN1_HUMAN	SNUPN	10073	Snurportin-1	+	-1.80726	4.08784	-6.35593	5.34714e-05	0.000230111
ENSG00000198888	P03886	P03886	DOWNREGULATED	NU1M_HUMAN	MT-ND1	4535	NADH-ubiquinone oxidoreductase chain 1	+	-1.81776	4.24147	-2.96904	0.0127395	0.0271389
ENSG00000091986	Q76M96	Q76M96	DOWNREGULATED	CCD80_HUMAN	CCDC80	151887	Coiled-coil domain-containing protein 80	+	-1.81825	5.4438	-10.0979	6.58674e-07	5.55503e-06
ENSG00000168297	Q7Z7A4	Q7Z7A4	DOWNREGULATED	PXK_HUMAN	PXK	54899	PX domain-containing protein kinase-like protein	+	-1.82034	5.06836	-3.80412	0.00291116	0.00752185
ENSG00000118246	Q9NYY8	Q9NYY8	DOWNREGULATED	FAKD2_HUMAN	FASTKD2	22868	FAST kinase domain-containing protein 2, mitochondrial	+	-1.82113	3.76303	-4.90751	0.000463051	0.00149704
ENSG00000132591	O75616	O75616	DOWNREGULATED	ERAL1_HUMAN	ERAL1	26284	GTPase Era, mitochondrial	+	-1.83105	4.12823	-8.19664	5.10893e-06	3.12625e-05
#N/A	P49427;Q712K3	P49427;Q712K3	DOWNREGULATED	UB2R1_HUMAN;UB2R2_HUMAN	CDC34;UBE2R2	#N/A	Ubiquitin-conjugating enzyme E2 R1	+	-1.83694	3.97515	-3.9582	0.00223162	0.00594868
ENSG00000013810	Q9Y6A5	Q9Y6A5	DOWNREGULATED	TACC3_HUMAN	TACC3	10460	Transforming acidic coiled-coil-containing protein 3	+	-1.86249	3.94039	-8.2151	4.9999e-06	3.06685e-05
ENSG00000084090	Q9NQZ5	Q9NQZ5	DOWNREGULATED	STAR7_HUMAN	STARD7	56910	StAR-related lipid transfer protein 7, mitochondrial	+	-1.89566	3.72212	-4.36477	0.00112156	0.00326423
ENSG00000104267	P00918	P00918	DOWNREGULATED	CAH2_HUMAN	CA2	760	Carbonic anhydrase 2	+	-1.91271	3.98368	-3.78354	0.00301696	0.00775618
#N/A	P62995;Q13595	P62995;Q13595	DOWNREGULATED	TRA2A_HUMAN;TRA2B_HUMAN	TRA2A;TRA2B	#N/A	Transformer-2 protein homolog beta	+	-1.94984	5.64244	-3.06615	0.0107083	0.0233643
ENSG00000165806	P55210	P55210	DOWNREGULATED	CASP7_HUMAN	CASP7	840	Caspase-7	+	-2.01232	4.10938	-5.88638	0.000104258	0.00040922
ENSG00000128944	Q9Y448	Q9Y448	DOWNREGULATED	SKAP_HUMAN	KNSTRN	90417	Small kinetochore-associated protein	+	-2.01333	4.13079	-6.54479	4.12212e-05	0.000185315
ENSG00000197635	P27487	P27487	DOWNREGULATED	DPP4_HUMAN	DPP4	1803	Dipeptidyl peptidase 4	+	-2.02152	5.16679	-5.83563	0.000112264	0.000437634
ENSG00000163694	A0AV96	A0AV96	DOWNREGULATED	RBM47_HUMAN	RBM47	54502	RNA-binding protein 47	+	-2.02347	3.85394	-6.06864	8.0167e-05	0.000326649
ENSG00000157110	Q93062	Q93062	DOWNREGULATED	RBPMS_HUMAN	RBPMS	11030	RNA-binding protein with multiple splicing	+	-2.05951	4.09306	-6.05806	8.13898e-05	0.000330843
ENSG00000135443	P78386	P78386	DOWNREGULATED	KRT85_HUMAN	KRT85	3891	Keratin, type II cuticular Hb5	+	-2.0935	4.08762	-3.53348	0.00467077	0.0113651
ENSG00000175183	Q16527	Q16527	DOWNREGULATED	CSRP2_HUMAN	CSRP2	1466	Cysteine and glycine-rich protein 2	+	-2.09834	3.90431	-9.69047	9.93984e-07	7.79101e-06
ENSG00000139645	Q8NB46	Q8NB46	DOWNREGULATED	ANR52_HUMAN	ANKRD52	283373	Serine/threonine-protein phosphatase 6 regulatory ankyrin repeat subunit C	+	-2.10027	3.76536	-16.6058	3.78009e-09	8.54933e-08
ENSG00000133026	P35580	P35580;Q7Z406	DOWNREGULATED	MYH10_HUMAN	MYH10	4628	Myosin-10	+	-2.10789	6.65536	-51.9043	1.5807e-14	2.02882e-11
#N/A	O75150;Q5VTR2	O75150;Q5VTR2	DOWNREGULATED	BRE1A_HUMAN;BRE1B_HUMAN	RNF20;RNF40	#N/A	E3 ubiquitin-protein ligase BRE1B	+	-2.10937	4.57066	-3.95175	0.00225646	0.00600865
#N/A	O43639;P16333	O43639;P16333	DOWNREGULATED	NCK1_HUMAN;NCK2_HUMAN	NCK1;NCK2	#N/A	Cytoplasmic protein NCK2	+	-2.16246	4.82748	-3.63728	0.003893	0.00969762
ENSG00000163558	P41743	P41743	DOWNREGULATED	KPCI_HUMAN	PRKCI	5584	Protein kinase C iota type	+	-2.19293	5.467	-3.08103	0.0104272	0.0228093
ENSG00000175274	O14683	O14683	DOWNREGULATED	P5I11_HUMAN	TP53I11	9537	Tumor protein p53-inducible protein 11	+	-2.20469	4.20856	-9.21647	1.6334e-06	1.17779e-05
ENSG00000075624	P60709	P60709	DOWNREGULATED	ACTB_HUMAN	ACTB	60	Actin, cytoplasmic 1	+	-2.22197	5.24334	-7.31346	1.49847e-05	7.65486e-05
ENSG00000124813	Q13950	Q13950	DOWNREGULATED	RUNX2_HUMAN	RUNX2	860	Runt-related transcription factor 2	+	-2.27964	5.18558	-3.42285	0.0056772	0.0135001
#N/A	O14641;Q92997	O14640;O14641;Q92997;P54792	DOWNREGULATED	DVL2_HUMAN;DVL3_HUMAN	DVL2;DVL3	#N/A	Segment polarity protein dishevelled homolog DVL-2	+	-2.3225	4.11627	-11.6364	1.56198e-07	1.69539e-06
#N/A	C9JRZ8;O60218	C9JRZ8;O60218	DOWNREGULATED	AK1BA_HUMAN;AK1BF_HUMAN	AKR1B10;AKR1B15	#N/A	Aldo-keto reductase family 1 member B15	+	-2.34166	6.99167	-23.6518	8.46582e-11	5.05929e-09
ENSG00000086570	Q9NYQ8	Q9NYQ8	DOWNREGULATED	FAT2_HUMAN	FAT2	2196	Protocadherin Fat 2	+	-2.38568	4.05488	-11.0877	2.5592e-07	2.61212e-06
ENSG00000149591	Q01995	Q01995	DOWNREGULATED	TAGL_HUMAN	TAGLN	6876	Transgelin	+	-2.39591	6.71312	-41.2361	1.97321e-13	1.26631e-10
ENSG00000198074	O60218	C9JRZ8;O60218	DOWNREGULATED	AK1BA_HUMAN	AKR1B10	57016	Aldo-keto reductase family 1 member B10	+	-2.4342	7.78373	-30.1112	6.13862e-12	9.31351e-10
ENSG00000077420	Q7Z5R6	Q7Z5R6	DOWNREGULATED	AB1IP_HUMAN	APBB1IP	54518	Amyloid beta A4 precursor protein-binding family B member 1-interacting protein	+	-2.5022	3.88316	-10.6478	3.86034e-07	3.62321e-06
ENSG00000165092	P00352	P00352	DOWNREGULATED	AL1A1_HUMAN	ALDH1A1	216	Aldehyde dehydrogenase 1A1	+	-2.50358	8.4369	-59.3178	3.64556e-15	6.23877e-12
ENSG00000184009	P63261	P63261	DOWNREGULATED	ACTG_HUMAN	ACTG1	71	Actin, cytoplasmic 2	+	-2.51107	4.47052	-12.0309	1.10864e-07	1.27048e-06
ENSG00000261150	P58107	P58107	DOWNREGULATED	EPIPL_HUMAN	EPPK1	83481	Epiplakin	+	-2.51139	5.6673	-2.7807	0.0178482	0.0362615
ENSG00000100292	P09601	P09601	DOWNREGULATED	HMOX1_HUMAN	HMOX1	3162	Heme oxygenase 1	+	-2.55355	4.36379	-7.09514	1.98255e-05	9.71901e-05
ENSG00000164093	Q99697	O75364;P78337;Q99697	DOWNREGULATED	PITX2_HUMAN	PITX2	5308	Pituitary homeobox 2	+	-2.63422	4.23811	-21.6072	2.24953e-10	9.87103e-09
ENSG00000165140	P09467	P09467	DOWNREGULATED	F16P1_HUMAN	FBP1	2203	Fructose-1,6-bisphosphatase 1	+	-2.69542	4.36668	-10.9829	2.81895e-07	2.82006e-06
ENSG00000103381	Q9BRF8	Q9BRF8	DOWNREGULATED	CPPED_HUMAN	CPPED1	55313	Serine/threonine-protein phosphatase CPPED1	+	-2.73754	4.28632	-18.6486	1.09576e-09	3.21069e-08
ENSG00000143627	P30613	P30613	DOWNREGULATED	KPYR_HUMAN	PKLR	5313	Pyruvate kinase PKLR	+	-2.74285	4.94454	-3.12322	0.0096704	0.0213723
ENSG00000147872	Q99541	Q99541	DOWNREGULATED	PLIN2_HUMAN	PLIN2	123	Perilipin-2	+	-2.75189	4.3254	-9.90244	8.01026e-07	6.49679e-06
ENSG00000166866	Q9UBC5	Q9UBC5	DOWNREGULATED	MYO1A_HUMAN	MYO1A	4640	Unconventional myosin-Ia	+	-2.85156	4.43236	-4.39652	0.00106382	0.00311344
ENSG00000198848	P23141	P23141	DOWNREGULATED	EST1_HUMAN	CES1	1066	Liver carboxylesterase 1	+	-2.9098	4.31062	-8.18035	5.20728e-06	3.17508e-05
ENSG00000132182	Q8TEM1	Q8TEM1	DOWNREGULATED	PO210_HUMAN	NUP210	23225	Nuclear pore membrane glycoprotein 210	+	-3.02193	4.80046	-12.3665	8.34584e-08	1.01294e-06
ENSG00000169583	O95833	O95833	DOWNREGULATED	CLIC3_HUMAN	CLIC3	9022	Chloride intracellular channel protein 3	+	-3.07358	4.51513	-20.5646	3.83329e-10	1.43651e-08
ENSG00000137285	Q9BVA1	Q9BVA1	DOWNREGULATED	TBB2B_HUMAN	TUBB2B	347733	Tubulin beta-2B chain	+	-3.09951	4.72065	-12.417	8.00135e-08	9.82749e-07
ENSG00000076716	O75487	O75487	DOWNREGULATED	GPC4_HUMAN	GPC4	2239	Glypican-4	+	-3.19871	4.84027	-13.5971	3.11278e-08	4.62431e-07
ENSG00000196549	P08473	P08473	DOWNREGULATED	NEP_HUMAN	MME	4311	Neprilysin	+	-3.37443	4.89763	-13.5992	3.10768e-08	4.62431e-07
ENSG00000178882	Q6ZTI6	Q6ZTI6	DOWNREGULATED	RFLA_HUMAN	RFLNA	144347	Refilin-A	+	-3.38936	4.40111	-11.1015	2.52687e-07	2.58426e-06
ENSG00000173898	O15020	O15020	DOWNREGULATED	SPTN2_HUMAN	SPTBN2	6712	Spectrin beta chain, non-erythrocytic 2	+	-3.48151	4.36062	-33.8385	1.71743e-12	4.41944e-10
#N/A	P35580;P35749	P35580;P35749	DOWNREGULATED	MYH10_HUMAN;MYH11_HUMAN	MYH10;MYH11	#N/A	Myosin-10	+	-3.48991	5.12447	-7.23294	1.66033e-05	8.34063e-05
ENSG00000134240	P54868	P54868	DOWNREGULATED	HMCS2_HUMAN	HMGCS2	3158	Hydroxymethylglutaryl-CoA synthase, mitochondrial	+	-3.77632	4.34804	-28.5931	1.07859e-11	1.25852e-09
ENSG00000240583	P29972	P29972	DOWNREGULATED	AQP1_HUMAN	AQP1	358	Aquaporin-1	+	-4.09568	4.92821	-16.7339	3.48337e-09	8.09213e-08
ENSG00000125726	P32970	P32970	DOWNREGULATED	CD70_HUMAN	CD70	970	CD70 antigen	+	-4.28272	4.74079	-17.4074	2.28803e-09	5.9327e-08
ENSG00000130707	P00966	P00966	DOWNREGULATED	ASSY_HUMAN	ASS1	445	Argininosuccinate synthase	+	-4.49697	5.25992	-8.41998	3.94472e-06	2.49719e-05
#N/A	P08670;P14136	P08670;P14136	DOWNREGULATED	GFAP_HUMAN;VIME_HUMAN	GFAP;VIM	#N/A	Vimentin	+	-4.81692	5.34703	-37.9759	4.86353e-13	2.04023e-10
ENSG00000154096	P04216	P04216	DOWNREGULATED	THY1_HUMAN	THY1	7070	Thy-1 membrane glycoprotein	+	-4.84779	5.33975	-20.783	3.42112e-10	1.35108e-08
#N/A	P07197;P08670	P07196;P07197;P08670;P12036;P17661;Q16352	DOWNREGULATED	NFM_HUMAN;VIME_HUMAN	NEFM;VIM	#N/A	Neurofilament medium polypeptide	+	-4.87662	7.42142	-33.6802	1.80772e-12	4.41944e-10
ENSG00000026025	P08670	P08670	DOWNREGULATED	VIME_HUMAN	VIM	7431	Vimentin	+	-4.9143	9.69515	-49.9571	2.40547e-14	2.05828e-11
ENSG00000135480	P08729	P08729	DOWNREGULATED	K2C7_HUMAN	KRT7	3855	Keratin, type II cytoskeletal 7	+	-5.15984	5.44184	-33.7123	1.78897e-12	4.41944e-10
