# Supplementary material for: Proteomic profiling identifies miR-423-5p as a modulator of oncogenic metabolism in HCC
Source: Springer Nature journal article supplement (doi:10.1186/s12967-025-07039-4), 2025-09-24
Supplement: MOESM5 [file 12967_2025_7039_MOESM5_ESM.xlsx]

## Sheet: miR423-ExpTargets_mirTarBase
Target Gene (Entrez ID)	Ensembl geneID	Species (Target Gene)	Experiments		Unique experimental targets - mirTarBase (348)
3927	ENSG00000002834	Homo sapiens	PAR-CLIP		ENSG00000105404
3927	ENSG00000002834	Homo sapiens	PAR-CLIP		ENSG00000169251
3927	ENSG00000002834	Homo sapiens	PAR-CLIP		ENSG00000164924
3927	ENSG00000002834	Homo sapiens	PAR-CLIP		ENSG00000185304
6542	ENSG00000003989	Homo sapiens	CLASH		ENSG00000178021
6542	ENSG00000003989	Homo sapiens	CLASH		ENSG00000184678
23129	ENSG00000004399	Homo sapiens	PAR-CLIP		ENSG00000129204
23129	ENSG00000004399	Homo sapiens	PAR-CLIP		ENSG00000226784
204	ENSG00000004455	Homo sapiens	PAR-CLIP		ENSG00000160305
204	ENSG00000004455	Homo sapiens	PAR-CLIP		ENSG00000198929
2288	ENSG00000004478	Homo sapiens	CLASH		ENSG00000103742
2288	ENSG00000004478	Homo sapiens	CLASH		ENSG00000135870
51573	ENSG00000006007	Homo sapiens	PAR-CLIP		ENSG00000130294
4293	ENSG00000006432	Homo sapiens	PAR-CLIP		ENSG00000116754
4293	ENSG00000006432	Homo sapiens	PAR-CLIP		ENSG00000029363
4784	ENSG00000008441	Homo sapiens	PAR-CLIP		ENSG00000134419
4784	ENSG00000008441	Homo sapiens	PAR-CLIP		ENSG00000118816
4784	ENSG00000008441	Homo sapiens	PAR-CLIP		ENSG00000135414
4784	ENSG00000008441	Homo sapiens	PAR-CLIP		ENSG00000134590
7812	ENSG00000009307	Homo sapiens	CLASH		ENSG00000243678
7812	ENSG00000009307	Homo sapiens	CLASH		ENSG00000198804
9774	ENSG00000029363	Homo sapiens	CLASH		ENSG00000241685
9774	ENSG00000029363	Homo sapiens	CLASH		ENSG00000101057
578	ENSG00000030110	Homo sapiens	PAR-CLIP		ENSG00000198786
578	ENSG00000030110	Homo sapiens	PAR-CLIP		ENSG00000072864
1175	ENSG00000042753	Homo sapiens	PAR-CLIP		ENSG00000147889
23327	ENSG00000049759	Homo sapiens	CLASH		ENSG00000182134
23327	ENSG00000049759	Homo sapiens	CLASH		ENSG00000170776
23118	ENSG00000055208	Homo sapiens	PAR-CLIP		ENSG00000124614
23118	ENSG00000055208	Homo sapiens	PAR-CLIP		ENSG00000134186
493	ENSG00000058668	Homo sapiens	CLASH		ENSG00000236334
493	ENSG00000058668	Homo sapiens	CLASH		ENSG00000130312
11338	ENSG00000063244	Homo sapiens	PAR-CLIP		ENSG00000104419
11338	ENSG00000063244	Homo sapiens	PAR-CLIP		ENSG00000177125
11338	ENSG00000063244	Homo sapiens	PAR-CLIP		ENSG00000198899
11338	ENSG00000063244	Homo sapiens	PAR-CLIP		ENSG00000185650
29924	ENSG00000063245	Homo sapiens	CLASH		ENSG00000119723
29924	ENSG00000063245	Homo sapiens	CLASH		ENSG00000178567
28996	ENSG00000064393	Homo sapiens	CLASH		ENSG00000135597
28996	ENSG00000064393	Homo sapiens	CLASH		ENSG00000131043
91283	ENSG00000066697	Homo sapiens	PAR-CLIP		ENSG00000196262
91283	ENSG00000066697	Homo sapiens	PAR-CLIP		ENSG00000099875
5315	ENSG00000067225	Homo sapiens	CLASH		ENSG00000165732
5315	ENSG00000067225	Homo sapiens	CLASH		ENSG00000131389
4335	ENSG00000070444	Homo sapiens	PAR-CLIP		ENSG00000140988
4335	ENSG00000070444	Homo sapiens	PAR-CLIP		ENSG00000160213
4335	ENSG00000070444	Homo sapiens	PAR-CLIP		ENSG00000114770
4335	ENSG00000070444	Homo sapiens	PAR-CLIP		ENSG00000149269
26986	ENSG00000070756	Homo sapiens	CLASH		ENSG00000116285
26986	ENSG00000070756	Homo sapiens	CLASH		ENSG00000086548
56852	ENSG00000070950	Homo sapiens	PAR-CLIP		ENSG00000135723
56852	ENSG00000070950	Homo sapiens	PAR-CLIP		ENSG00000176619
60343	ENSG00000071889	Homo sapiens	Luciferase reporter assay//qRT-PCR//Western blot		ENSG00000089818
60343	ENSG00000071889	Homo sapiens	Luciferase reporter assay//qRT-PCR//Western blot		ENSG00000182446
55679	ENSG00000072163	Homo sapiens	PAR-CLIP		ENSG00000165688
55679	ENSG00000072163	Homo sapiens	PAR-CLIP		ENSG00000139637
55679	ENSG00000072163	Homo sapiens	PAR-CLIP		ENSG00000123064
55679	ENSG00000072163	Homo sapiens	PAR-CLIP		ENSG00000103043
54820	ENSG00000072864	Homo sapiens	CLASH		ENSG00000159216
54820	ENSG00000072864	Homo sapiens	CLASH		ENSG00000119812
5076	ENSG00000075891	Homo sapiens	CLASH		ENSG00000063245
5076	ENSG00000075891	Homo sapiens	PAR-CLIP		ENSG00000164897
5076	ENSG00000075891	Homo sapiens	CLASH//PAR-CLIP		ENSG00000185651
5076	ENSG00000075891	Homo sapiens	CLASH//PAR-CLIP		ENSG00000169122
4791	ENSG00000077150	Homo sapiens	CLASH		ENSG00000100139
4791	ENSG00000077150	Homo sapiens	CLASH		ENSG00000146278
4034	ENSG00000077454	Homo sapiens	CLASH		ENSG00000105880
4034	ENSG00000077454	Homo sapiens	CLASH		ENSG00000197343
4680	ENSG00000086548	Homo sapiens	CLASH		ENSG00000117480
4680	ENSG00000086548	Homo sapiens	CLASH		ENSG00000111676
8079	ENSG00000089693	Homo sapiens	PAR-CLIP		ENSG00000131100
8079	ENSG00000089693	Homo sapiens	PAR-CLIP		ENSG00000109062
57062	ENSG00000089737	Homo sapiens	CLASH		ENSG00000166197
57062	ENSG00000089737	Homo sapiens	CLASH		ENSG00000182621
25977	ENSG00000089818	Homo sapiens	CLASH		ENSG00000161011
25977	ENSG00000089818	Homo sapiens	CLASH		ENSG00000171603
29888	ENSG00000090372	Homo sapiens	PAR-CLIP		ENSG00000177169
29888	ENSG00000090372	Homo sapiens	PAR-CLIP		ENSG00000058668
79594	ENSG00000090432	Homo sapiens	PAR-CLIP		ENSG00000159023
79594	ENSG00000090432	Homo sapiens	PAR-CLIP		ENSG00000187837
63967	ENSG00000092853	Homo sapiens	CLASH		ENSG00000158669
63967	ENSG00000092853	Homo sapiens	CLASH		ENSG00000134779
9117	ENSG00000093183	Homo sapiens	PAR-CLIP		ENSG00000004478
4295	ENSG00000096395	Homo sapiens	HITS-CLIP		ENSG00000172380
4295	ENSG00000096395	Homo sapiens	HITS-CLIP		ENSG00000170889
25	ENSG00000097007	Homo sapiens	PAR-CLIP		ENSG00000105640
25	ENSG00000097007	Homo sapiens	PAR-CLIP		ENSG00000118971
25	ENSG00000097007	Homo sapiens	PAR-CLIP		ENSG00000169564
25	ENSG00000097007	Homo sapiens	PAR-CLIP		ENSG00000185009
25	ENSG00000097007	Homo sapiens	PAR-CLIP		ENSG00000140992
25	ENSG00000097007	Homo sapiens	PAR-CLIP		ENSG00000132471
2872	ENSG00000099875	Homo sapiens	CLASH		ENSG00000092853
2872	ENSG00000099875	Homo sapiens	PAR-CLIP		ENSG00000164611
2872	ENSG00000099875	Homo sapiens	PAR-CLIP		ENSG00000125447
2872	ENSG00000099875	Homo sapiens	PAR-CLIP		ENSG00000111640
2872	ENSG00000099875	Homo sapiens	PAR-CLIP		ENSG00000141522
2872	ENSG00000099875	Homo sapiens	CLASH//PAR-CLIP		ENSG00000180901
2872	ENSG00000099875	Homo sapiens	CLASH//PAR-CLIP		ENSG00000170881
2872	ENSG00000099875	Homo sapiens	CLASH//PAR-CLIP		ENSG00000134909
2872	ENSG00000099875	Homo sapiens	CLASH//PAR-CLIP		ENSG00000197903
2872	ENSG00000099875	Homo sapiens	CLASH//PAR-CLIP		ENSG00000152700
85377	ENSG00000100139	Homo sapiens	CLASH		ENSG00000170515
85377	ENSG00000100139	Homo sapiens	CLASH		ENSG00000109332
9567	ENSG00000100226	Homo sapiens	CLASH		ENSG00000100226
9567	ENSG00000100226	Homo sapiens	CLASH		ENSG00000203814
7078	ENSG00000100234	Homo sapiens	CLASH		ENSG00000184507
7078	ENSG00000100234	Homo sapiens	CLASH		ENSG00000111652
4174	ENSG00000100297	Homo sapiens	PAR-CLIP		ENSG00000100413
23170	ENSG00000100304	Homo sapiens	PAR-CLIP		ENSG00000168298
55954	ENSG00000100319	Homo sapiens	PAR-CLIP		ENSG00000077150
55954	ENSG00000100319	Homo sapiens	PAR-CLIP		ENSG00000003989
9145	ENSG00000100321	Homo sapiens	PAR-CLIP		ENSG00000100234
9145	ENSG00000100321	Homo sapiens	PAR-CLIP		ENSG00000187514
9145	ENSG00000100321	Homo sapiens	PAR-CLIP		ENSG00000009307
9145	ENSG00000100321	Homo sapiens	PAR-CLIP		ENSG00000110651
9145	ENSG00000100321	Homo sapiens	PAR-CLIP		ENSG00000162063
9145	ENSG00000100321	Homo sapiens	PAR-CLIP		ENSG00000105323
8897	ENSG00000100330	Homo sapiens	CLASH		ENSG00000173653
8897	ENSG00000100330	Homo sapiens	CLASH		ENSG00000180921
171568	ENSG00000100413	Homo sapiens	CLASH		ENSG00000188290
171568	ENSG00000100413	Homo sapiens	CLASH		ENSG00000160767
79890	ENSG00000100599	Homo sapiens	PAR-CLIP		ENSG00000211584
79890	ENSG00000100599	Homo sapiens	PAR-CLIP		ENSG00000106266
328	ENSG00000100823	Homo sapiens	PAR-CLIP		ENSG00000159840
6729	ENSG00000100883	Homo sapiens	CLASH		ENSG00000175550
6729	ENSG00000100883	Homo sapiens	CLASH		ENSG00000136478
57680	ENSG00000100888	Homo sapiens	CLASH		ENSG00000167173
57680	ENSG00000100888	Homo sapiens	CLASH		ENSG00000077454
4605	ENSG00000101057	Homo sapiens	CLASH		ENSG00000100888
4605	ENSG00000101057	Homo sapiens	PAR-CLIP		ENSG00000136997
4605	ENSG00000101057	Homo sapiens	CLASH		ENSG00000130726
4605	ENSG00000101057	Homo sapiens	CLASH		ENSG00000162430
54976	ENSG00000101220	Homo sapiens	PAR-CLIP		ENSG00000105556
54976	ENSG00000101220	Homo sapiens	PAR-CLIP		ENSG00000122592
25876	ENSG00000101222	Homo sapiens	PAR-CLIP		ENSG00000204469
9371	ENSG00000101350	Homo sapiens	HITS-CLIP		ENSG00000100883
55697	ENSG00000103043	Homo sapiens	CLASH		ENSG00000070756
55697	ENSG00000103043	Homo sapiens	CLASH		ENSG00000116649
1186	ENSG00000103249	Homo sapiens	PAR-CLIP		ENSG00000125651
1186	ENSG00000103249	Homo sapiens	PAR-CLIP		ENSG00000064393
6650	ENSG00000103326	Homo sapiens	PAR-CLIP		ENSG00000049759
6650	ENSG00000103326	Homo sapiens	PAR-CLIP		ENSG00000111481
6650	ENSG00000103326	Homo sapiens	CLIP-Seq dataset analysis		ENSG00000135821
56061	ENSG00000103353	Homo sapiens	PAR-CLIP		ENSG00000155846
56061	ENSG00000103353	Homo sapiens	PAR-CLIP		ENSG00000067225
56061	ENSG00000103353	Homo sapiens	PAR-CLIP		ENSG00000109919
56061	ENSG00000103353	Homo sapiens	PAR-CLIP		ENSG00000184009
6299	ENSG00000103449	Homo sapiens	CLASH		ENSG00000100330
6299	ENSG00000103449	Homo sapiens	CLASH		ENSG00000170540
57722	ENSG00000103742	Homo sapiens	CLASH		ENSG00000089737
57722	ENSG00000103742	Homo sapiens	CLASH		ENSG00000196230
10397	ENSG00000104419	Homo sapiens	CLASH		ENSG00000165671
10397	ENSG00000104419	Homo sapiens	CLASH		ENSG00000075891
11100	ENSG00000105323	Homo sapiens	CLASH		ENSG00000110955
11100	ENSG00000105323	Homo sapiens	CLASH		ENSG00000172216
10567	ENSG00000105404	Homo sapiens	CLASH		ENSG00000134684
10567	ENSG00000105404	Homo sapiens	CLASH		ENSG00000128578
54531	ENSG00000105556	Homo sapiens	CLASH		ENSG00000153885
54531	ENSG00000105556	Homo sapiens	CLASH		ENSG00000198242
6142	ENSG00000105640	Homo sapiens	CLASH		ENSG00000140545
6142	ENSG00000105640	Homo sapiens	CLASH		ENSG00000189091
1749	ENSG00000105880	Homo sapiens	CLASH		ENSG00000147403
1749	ENSG00000105880	Homo sapiens	CLASH		ENSG00000103449
29886	ENSG00000106266	Homo sapiens	CLASH		ENSG00000107949
29886	ENSG00000106266	Homo sapiens	CLASH		ENSG00000163636
23413	ENSG00000107130	Homo sapiens	HITS-CLIP		ENSG00000118579
23413	ENSG00000107130	Homo sapiens	HITS-CLIP		ENSG00000140406
6387	ENSG00000107562	Homo sapiens	RNA-seq//qRT-PCR		ENSG00000173402
56647	ENSG00000107949	Homo sapiens	CLASH		ENSG00000160182
56647	ENSG00000107949	Homo sapiens	CLASH		ENSG00000162302
9144	ENSG00000108639	Homo sapiens	PAR-CLIP		ENSG00000139644
9144	ENSG00000108639	Homo sapiens	PAR-CLIP		ENSG00000265972
5717	ENSG00000108671	Homo sapiens	PAR-CLIP		ENSG00000160014
5717	ENSG00000108671	Homo sapiens	PAR-CLIP		ENSG00000186575
7531	ENSG00000108953	Homo sapiens	PAR-CLIP		ENSG00000103353
7531	ENSG00000108953	Homo sapiens	PAR-CLIP		ENSG00000063244
9368	ENSG00000109062	Homo sapiens	CLASH		ENSG00000205730
9368	ENSG00000109062	Homo sapiens	CLASH		ENSG00000248485
230	ENSG00000109107	Homo sapiens	HITS-CLIP		ENSG00000128294
230	ENSG00000109107	Homo sapiens	HITS-CLIP		ENSG00000204851
7323	ENSG00000109332	Homo sapiens	CLASH		ENSG00000173391
7323	ENSG00000109332	Homo sapiens	CLASH		ENSG00000187554
23788	ENSG00000109919	Homo sapiens	CLASH		ENSG00000170525
23788	ENSG00000109919	Homo sapiens	CLASH		ENSG00000164402
5818	ENSG00000110400	Homo sapiens	PAR-CLIP		ENSG00000196821
975	ENSG00000110651	Homo sapiens	CLASH		ENSG00000169562
975	ENSG00000110651	Homo sapiens	CLASH		ENSG00000116584
506	ENSG00000110955	Homo sapiens	CLASH		ENSG00000112031
506	ENSG00000110955	Homo sapiens	CLASH		ENSG00000116962
22818	ENSG00000111481	Homo sapiens	CLASH		ENSG00000100319
22818	ENSG00000111481	Homo sapiens	CLASH		ENSG00000175946
2597	ENSG00000111640	Homo sapiens	CLASH		ENSG00000173714
2597	ENSG00000111640	Homo sapiens	CLASH		ENSG00000169836
50813	ENSG00000111652	Homo sapiens	CLASH		ENSG00000090432
50813	ENSG00000111652	Homo sapiens	CLASH		ENSG00000101220
1822	ENSG00000111676	Homo sapiens	CLASH		ENSG00000171475
1822	ENSG00000111676	Homo sapiens	CLASH		ENSG00000111962
10090	ENSG00000111962	Homo sapiens	PAR-CLIP		ENSG00000167118
10090	ENSG00000111962	Homo sapiens	PAR-CLIP		ENSG00000108639
54516	ENSG00000112031	Homo sapiens	PAR-CLIP		ENSG00000187678
54516	ENSG00000112031	Homo sapiens	PAR-CLIP		ENSG00000169682
1871	ENSG00000112242	Homo sapiens	PAR-CLIP		ENSG00000185591
1871	ENSG00000112242	Homo sapiens	PAR-CLIP		ENSG00000183955
10057	ENSG00000114770	Homo sapiens	CLASH		ENSG00000108671
10057	ENSG00000114770	Homo sapiens	PAR-CLIP		ENSG00000204619
10057	ENSG00000114770	Homo sapiens	PAR-CLIP		ENSG00000004399
10057	ENSG00000114770	Homo sapiens	CLASH//PAR-CLIP		ENSG00000172840
10057	ENSG00000114770	Homo sapiens	CLASH//PAR-CLIP		ENSG00000066697
10057	ENSG00000114770	Homo sapiens	CLASH//PAR-CLIP		ENSG00000141503
54206	ENSG00000116285	Homo sapiens	CLASH		ENSG00000198625
54206	ENSG00000116285	Homo sapiens	CLASH		ENSG00000006432
9181	ENSG00000116584	Homo sapiens	PAR-CLIP		ENSG00000002834
9181	ENSG00000116584	Homo sapiens	PAR-CLIP		ENSG00000142459
6723	ENSG00000116649	Homo sapiens	CLASH		ENSG00000142634
6723	ENSG00000116649	Homo sapiens	PAR-CLIP		ENSG00000112242
6723	ENSG00000116649	Homo sapiens	PAR-CLIP		ENSG00000175826
6723	ENSG00000116649	Homo sapiens	PAR-CLIP		ENSG00000168802
6723	ENSG00000116649	Homo sapiens	PAR-CLIP		ENSG00000141480
6723	ENSG00000116649	Homo sapiens	CLASH//PAR-CLIP		ENSG00000004455
6723	ENSG00000116649	Homo sapiens	CLASH//PAR-CLIP		ENSG00000225663
6723	ENSG00000116649	Homo sapiens	CLASH//PAR-CLIP		ENSG00000198363
6723	ENSG00000116649	Homo sapiens	CLASH//PAR-CLIP		ENSG00000125492
6723	ENSG00000116649	Homo sapiens	CLASH//PAR-CLIP		ENSG00000130584
9295	ENSG00000116754	Homo sapiens	CLASH		ENSG00000135127
9295	ENSG00000116754	Homo sapiens	CLASH		ENSG00000160469
4811	ENSG00000116962	Homo sapiens	PAR-CLIP		ENSG00000103249
4811	ENSG00000116962	Homo sapiens	PAR-CLIP		ENSG00000072163
2166	ENSG00000117480	Homo sapiens	CLASH		ENSG00000222047
2166	ENSG00000117480	Homo sapiens	CLASH		ENSG00000288547
4297	ENSG00000118058	Homo sapiens	PAR-CLIP		ENSG00000137494
1385	ENSG00000118260	Homo sapiens	PAR-CLIP		ENSG00000172530
1385	ENSG00000118260	Homo sapiens	PAR-CLIP		ENSG00000130940
80306	ENSG00000118579	Homo sapiens	CLASH		ENSG00000148826
80306	ENSG00000118579	Homo sapiens	PAR-CLIP		ENSG00000183734
80306	ENSG00000118579	Homo sapiens	CLASH//PAR-CLIP		ENSG00000182272
80306	ENSG00000118579	Homo sapiens	CLASH//PAR-CLIP		ENSG00000100321
10983	ENSG00000118816	Homo sapiens	CLASH		ENSG00000165300
10983	ENSG00000118816	Homo sapiens	CLASH		ENSG00000097007
894	ENSG00000118971	Homo sapiens	CLASH		ENSG00000176974
894	ENSG00000118971	Homo sapiens	CLASH		ENSG00000090372
51004	ENSG00000119723	Homo sapiens	CLASH		ENSG00000204252
51004	ENSG00000119723	Homo sapiens	CLASH		ENSG00000100599
25940	ENSG00000119812	Homo sapiens	CLASH		ENSG00000070444
25940	ENSG00000119812	Homo sapiens	CLASH		ENSG00000108953
3204	ENSG00000122592	Homo sapiens	CLASH		ENSG00000132478
3204	ENSG00000122592	Homo sapiens	CLASH		ENSG00000055208
79039	ENSG00000123064	Homo sapiens	CLASH		ENSG00000177732
79039	ENSG00000123064	Homo sapiens	CLASH		ENSG00000134369
11317	ENSG00000124232	Homo sapiens	PAR-CLIP		ENSG00000188613
11317	ENSG00000124232	Homo sapiens	PAR-CLIP		ENSG00000254726
6204	ENSG00000124614	Homo sapiens	CLASH		ENSG00000171303
6204	ENSG00000124614	Homo sapiens	CLASH		ENSG00000169258
23163	ENSG00000125447	Homo sapiens	CLASH		ENSG00000173812
23163	ENSG00000125447	Homo sapiens	CLASH		ENSG00000103326
56751	ENSG00000125492	Homo sapiens	PAR-CLIP		ENSG00000198925
56751	ENSG00000125492	Homo sapiens	PAR-CLIP		ENSG00000143862
56751	ENSG00000125492	Homo sapiens	PAR-CLIP		ENSG00000198720
56751	ENSG00000125492	Homo sapiens	PAR-CLIP		ENSG00000149591
56751	ENSG00000125492	Homo sapiens	PAR-CLIP		ENSG00000138316
56751	ENSG00000125492	Homo sapiens	PAR-CLIP		ENSG00000173757
56751	ENSG00000125492	Homo sapiens	PAR-CLIP		ENSG00000118260
56751	ENSG00000125492	Homo sapiens	PAR-CLIP		ENSG00000124232
2962	ENSG00000125651	Homo sapiens	CLASH		ENSG00000138834
2962	ENSG00000125651	Homo sapiens	CLASH		ENSG00000158480
5326	ENSG00000126003	Homo sapiens	PAR-CLIP		ENSG00000138074
5326	ENSG00000126003	Homo sapiens	PAR-CLIP		ENSG00000183741
5326	ENSG00000126003	Homo sapiens	PAR-CLIP		ENSG00000166508
5326	ENSG00000126003	Homo sapiens	PAR-CLIP		ENSG00000189241
27245	ENSG00000126705	Homo sapiens	PAR-CLIP		ENSG00000070950
8459	ENSG00000128294	Homo sapiens	PAR-CLIP		ENSG00000126003
8459	ENSG00000128294	Homo sapiens	PAR-CLIP		ENSG00000030110
57464	ENSG00000128578	Homo sapiens	CLASH		ENSG00000198598
57464	ENSG00000128578	Homo sapiens	CLASH		ENSG00000008441
9098	ENSG00000129204	Homo sapiens	CLASH		ENSG00000138395
9098	ENSG00000129204	Homo sapiens	CLASH		ENSG00000107130
547	ENSG00000130294	Homo sapiens	CLASH		ENSG00000109107
547	ENSG00000130294	Homo sapiens	CLASH		ENSG00000141622
64981	ENSG00000130312	Homo sapiens	CLASH		ENSG00000163531
64981	ENSG00000130312	Homo sapiens	CLASH		ENSG00000096395
140685	ENSG00000130584	Homo sapiens	PAR-CLIP		ENSG00000142583
140685	ENSG00000130584	Homo sapiens	PAR-CLIP		ENSG00000182979
140685	ENSG00000130584	Homo sapiens	PAR-CLIP		ENSG00000150347
140685	ENSG00000130584	Homo sapiens	PAR-CLIP		ENSG00000182771
140685	ENSG00000130584	Homo sapiens	PAR-CLIP		ENSG00000173581
140685	ENSG00000130584	Homo sapiens	PAR-CLIP		ENSG00000178307
140685	ENSG00000130584	Homo sapiens	PAR-CLIP		ENSG00000196581
140685	ENSG00000130584	Homo sapiens	PAR-CLIP		ENSG00000171848
140685	ENSG00000130584	Homo sapiens	PAR-CLIP		ENSG00000071889
140685	ENSG00000130584	Homo sapiens	PAR-CLIP		ENSG00000148671
10155	ENSG00000130726	Homo sapiens	CLASH		ENSG00000126705
10155	ENSG00000130726	Homo sapiens	CLASH		ENSG00000139645
54897	ENSG00000130940	Homo sapiens	PAR-CLIP		ENSG00000042753
54897	ENSG00000130940	Homo sapiens	PAR-CLIP		ENSG00000100823
54897	ENSG00000130940	Homo sapiens	PAR-CLIP		ENSG00000244509
54897	ENSG00000130940	Homo sapiens	PAR-CLIP		ENSG00000242259
25980	ENSG00000131043	Homo sapiens	CLASH		ENSG00000141570
25980	ENSG00000131043	Homo sapiens	CLASH		ENSG00000163064
529	ENSG00000131100	Homo sapiens	CLASH		ENSG00000136830
529	ENSG00000131100	Homo sapiens	PAR-CLIP		ENSG00000164916
529	ENSG00000131100	Homo sapiens	CLASH		ENSG00000143321
529	ENSG00000131100	Homo sapiens	CLASH		ENSG00000118058
6533	ENSG00000131389	Homo sapiens	CLASH		ENSG00000272333
6533	ENSG00000131389	Homo sapiens	CLASH		ENSG00000155506
84231	ENSG00000131653	Homo sapiens	PAR-CLIP		ENSG00000100297
23558	ENSG00000132471	Homo sapiens	CLASH		ENSG00000089693
23558	ENSG00000132471	Homo sapiens	CLASH		ENSG00000160877
85451	ENSG00000132478	Homo sapiens	PAR-CLIP		ENSG00000144959
85451	ENSG00000132478	Homo sapiens	PAR-CLIP		ENSG00000110400
85451	ENSG00000132478	Homo sapiens	PAR-CLIP		ENSG00000221890
85451	ENSG00000132478	Homo sapiens	PAR-CLIP		ENSG00000204304
23135	ENSG00000132510	Homo sapiens	PAR-CLIP		ENSG00000162734
201266	ENSG00000133195	Homo sapiens	PAR-CLIP		ENSG00000171314
55119	ENSG00000134186	Homo sapiens	CLASH		ENSG00000204138
55119	ENSG00000134186	Homo sapiens	CLASH		ENSG00000166169
89796	ENSG00000134369	Homo sapiens	PAR-CLIP		ENSG00000166794
89796	ENSG00000134369	Homo sapiens	PAR-CLIP		ENSG00000288701
6210	ENSG00000134419	Homo sapiens	CLASH		ENSG00000168159
6210	ENSG00000134419	Homo sapiens	CLASH		ENSG00000146223
8933	ENSG00000134590	Homo sapiens	CLASH		ENSG00000188322
8933	ENSG00000134590	Homo sapiens	CLASH		ENSG00000140497
8565	ENSG00000134684	Homo sapiens	CLASH		ENSG00000093183
8565	ENSG00000134684	Homo sapiens	CLASH		ENSG00000184640
25941	ENSG00000134779	Homo sapiens	CLASH		ENSG00000251322
25941	ENSG00000134779	Homo sapiens	CLASH		ENSG00000133195
9743	ENSG00000134909	Homo sapiens	CLASH		ENSG00000101222
9743	ENSG00000134909	Homo sapiens	CLASH		ENSG00000135956
92558	ENSG00000135127	Homo sapiens	PAR-CLIP		ENSG00000131653
92558	ENSG00000135127	Homo sapiens	PAR-CLIP		ENSG00000146063
92558	ENSG00000135127	Homo sapiens	PAR-CLIP		ENSG00000100304
92558	ENSG00000135127	Homo sapiens	PAR-CLIP		ENSG00000158195
92558	ENSG00000135127	Homo sapiens	PAR-CLIP		ENSG00000141580
10220	ENSG00000135414	Homo sapiens	CLASH		ENSG00000180357
10220	ENSG00000135414	Homo sapiens	CLASH		ENSG00000142409
85021	ENSG00000135597	Homo sapiens	CLASH		ENSG00000253626
85021	ENSG00000135597	Homo sapiens	CLASH		ENSG00000006007
29109	ENSG00000135723	Homo sapiens	CLASH		ENSG00000132510
29109	ENSG00000135723	Homo sapiens	CLASH		ENSG00000167470
2752	ENSG00000135821	Homo sapiens	CLASH		ENSG00000198208
2752	ENSG00000135821	Homo sapiens	CLASH		ENSG00000167323
149041	ENSG00000135870	Homo sapiens	CLASH		ENSG00000198792
149041	ENSG00000135870	Homo sapiens	CLASH		ENSG00000204524
55654	ENSG00000135956	Homo sapiens	PAR-CLIP		ENSG00000101350
55852	ENSG00000136478	Homo sapiens	CLASH		ENSG00000165476
55852	ENSG00000136478	Homo sapiens	CLASH		ENSG00000107562
64855	ENSG00000136830	Homo sapiens	PAR-CLIP		ENSG00000168884
4609	ENSG00000136997	Homo sapiens	CLASH		ENSG00000260279
4609	ENSG00000136997	Homo sapiens	CLASH		ENSG00000138031
338699	ENSG00000137494	Homo sapiens	PAR-CLIP		ENSG00000249395
338699	ENSG00000137494	Homo sapiens	PAR-CLIP
109	ENSG00000138031	Homo sapiens	Western blotting//RNA-seq//qRT-PCR
8884	ENSG00000138074	Homo sapiens	PAR-CLIP
8884	ENSG00000138074	Homo sapiens	PAR-CLIP
8884	ENSG00000138074	Homo sapiens	PAR-CLIP
8884	ENSG00000138074	Homo sapiens	PAR-CLIP
140766	ENSG00000138316	Homo sapiens	PAR-CLIP
140766	ENSG00000138316	Homo sapiens	PAR-CLIP
65061	ENSG00000138395	Homo sapiens	HITS-CLIP
65061	ENSG00000138395	Homo sapiens	HITS-CLIP
65061	ENSG00000138395	Homo sapiens	HITS-CLIP
65061	ENSG00000138395	Homo sapiens	HITS-CLIP
23162	ENSG00000138834	Homo sapiens	PAR-CLIP
23162	ENSG00000138834	Homo sapiens	PAR-CLIP
23162	ENSG00000138834	Homo sapiens	PAR-CLIP
23162	ENSG00000138834	Homo sapiens	PAR-CLIP
23162	ENSG00000138834	Homo sapiens	PAR-CLIP
23162	ENSG00000138834	Homo sapiens	PAR-CLIP
60314	ENSG00000139637	Homo sapiens	CLASH
60314	ENSG00000139637	Homo sapiens	CLASH
7009	ENSG00000139644	Homo sapiens	PAR-CLIP
7009	ENSG00000139644	Homo sapiens	PAR-CLIP
283373	ENSG00000139645	Homo sapiens	PAR-CLIP
59274	ENSG00000140406	Homo sapiens	CLASH
59274	ENSG00000140406	Homo sapiens	CLASH
10066	ENSG00000140497	Homo sapiens	PAR-CLIP
4240	ENSG00000140545	Homo sapiens	CLASH
4240	ENSG00000140545	Homo sapiens	CLASH
6187	ENSG00000140988	Homo sapiens	CLASH
6187	ENSG00000140988	Homo sapiens	CLASH
5170	ENSG00000140992	Homo sapiens	CLASH
5170	ENSG00000140992	Homo sapiens	CLASH
409	ENSG00000141480	Homo sapiens	PAR-CLIP
409	ENSG00000141480	Homo sapiens	PAR-CLIP
50488	ENSG00000141503	Homo sapiens	PAR-CLIP
50488	ENSG00000141503	Homo sapiens	PAR-CLIP
50488	ENSG00000141503	Homo sapiens	PAR-CLIP
50488	ENSG00000141503	Homo sapiens	PAR-CLIP
396	ENSG00000141522	Homo sapiens	CLASH
396	ENSG00000141522	Homo sapiens	CLASH
57332	ENSG00000141570	Homo sapiens	PAR-CLIP
56270	ENSG00000141580	Homo sapiens	PAR-CLIP
494470	ENSG00000141622	Homo sapiens	HITS-CLIP
494470	ENSG00000141622	Homo sapiens	HITS-CLIP
126208	ENSG00000142409	Homo sapiens	PAR-CLIP
115704	ENSG00000142459	Homo sapiens	PAR-CLIP
115704	ENSG00000142459	Homo sapiens	PAR-CLIP
6518	ENSG00000142583	Homo sapiens	HITS-CLIP
6518	ENSG00000142583	Homo sapiens	HITS-CLIP
79180	ENSG00000142634	Homo sapiens	PAR-CLIP
79180	ENSG00000142634	Homo sapiens	PAR-CLIP
3068	ENSG00000143321	Homo sapiens	PAR-CLIP
127829	ENSG00000143862	Homo sapiens	PAR-CLIP
127829	ENSG00000143862	Homo sapiens	PAR-CLIP
57552	ENSG00000144959	Homo sapiens	PAR-CLIP
90933	ENSG00000146063	Homo sapiens	PAR-CLIP
285855	ENSG00000146223	Homo sapiens	PAR-CLIP
10957	ENSG00000146278	Homo sapiens	CLASH
10957	ENSG00000146278	Homo sapiens	CLASH
6134	ENSG00000147403	Homo sapiens	CLASH
6134	ENSG00000147403	Homo sapiens	CLASH
1029	ENSG00000147889	Homo sapiens	CLASH
1029	ENSG00000147889	Homo sapiens	CLASH
10974	ENSG00000148671	Homo sapiens	PAR-CLIP
84504	ENSG00000148826	Homo sapiens	PAR-CLIP
84504	ENSG00000148826	Homo sapiens	PAR-CLIP
84504	ENSG00000148826	Homo sapiens	PAR-CLIP
84504	ENSG00000148826	Homo sapiens	PAR-CLIP
84504	ENSG00000148826	Homo sapiens	PAR-CLIP
84504	ENSG00000148826	Homo sapiens	PAR-CLIP
5058	ENSG00000149269	Homo sapiens	CLASH
5058	ENSG00000149269	Homo sapiens	CLASH
6876	ENSG00000149591	Homo sapiens	PAR-CLIP
6876	ENSG00000149591	Homo sapiens	PAR-CLIP
84159	ENSG00000150347	Homo sapiens	HITS-CLIP
84159	ENSG00000150347	Homo sapiens	HITS-CLIP
51128	ENSG00000152700	Homo sapiens	CLASH
51128	ENSG00000152700	Homo sapiens	CLASH
79047	ENSG00000153885	Homo sapiens	CLASH
79047	ENSG00000153885	Homo sapiens	CLASH
23367	ENSG00000155506	Homo sapiens	PAR-CLIP
133522	ENSG00000155846	Homo sapiens	CLASH
133522	ENSG00000155846	Homo sapiens	CLASH
10163	ENSG00000158195	Homo sapiens	PAR-CLIP
9825	ENSG00000158480	Homo sapiens	PAR-CLIP
9825	ENSG00000158480	Homo sapiens	PAR-CLIP
9825	ENSG00000158480	Homo sapiens	PAR-CLIP
9825	ENSG00000158480	Homo sapiens	PAR-CLIP
9825	ENSG00000158480	Homo sapiens	PAR-CLIP
9825	ENSG00000158480	Homo sapiens	PAR-CLIP
9825	ENSG00000158480	Homo sapiens	PAR-CLIP
9825	ENSG00000158480	Homo sapiens	PAR-CLIP
9825	ENSG00000158480	Homo sapiens	PAR-CLIP
9825	ENSG00000158480	Homo sapiens	PAR-CLIP
137964	ENSG00000158669	Homo sapiens	CLASH
137964	ENSG00000158669	Homo sapiens	CLASH
2035	ENSG00000159023	Homo sapiens	CLASH
2035	ENSG00000159023	Homo sapiens	CLASH
861	ENSG00000159216	Homo sapiens	CLASH
861	ENSG00000159216	Homo sapiens	CLASH
7791	ENSG00000159840	Homo sapiens	CLASH
7791	ENSG00000159840	Homo sapiens	CLASH
808	ENSG00000160014	Homo sapiens	PAR-CLIP
808	ENSG00000160014	Homo sapiens	PAR-CLIP
808	ENSG00000160014	Homo sapiens	PAR-CLIP
808	ENSG00000160014	Homo sapiens	PAR-CLIP
7031	ENSG00000160182	Homo sapiens	Luciferase reporter assay//qRT-PCR//Western blot
7031	ENSG00000160182	Homo sapiens	Luciferase reporter assay//qRT-PCR//Western blot
1476	ENSG00000160213	Homo sapiens	CLASH
1476	ENSG00000160213	Homo sapiens	CLASH
23181	ENSG00000160305	Homo sapiens	CLASH
23181	ENSG00000160305	Homo sapiens	CLASH
84446	ENSG00000160469	Homo sapiens	PAR-CLIP
84446	ENSG00000160469	Homo sapiens	PAR-CLIP
10712	ENSG00000160767	Homo sapiens	CLASH
10712	ENSG00000160767	Homo sapiens	HITS-CLIP
10712	ENSG00000160767	Homo sapiens	CLASH//HITS-CLIP
10712	ENSG00000160767	Homo sapiens	CLASH//HITS-CLIP
112939	ENSG00000160877	Homo sapiens	PAR-CLIP
8878	ENSG00000161011	Homo sapiens	CLASH
8878	ENSG00000161011	Homo sapiens	CLASH
899	ENSG00000162063	Homo sapiens	CLASH
899	ENSG00000162063	Homo sapiens	CLASH
8986	ENSG00000162302	Homo sapiens	PAR-CLIP
8986	ENSG00000162302	Homo sapiens	PAR-CLIP
57190	ENSG00000162430	Homo sapiens	CLASH
57190	ENSG00000162430	Homo sapiens	CLASH
8682	ENSG00000162734	Homo sapiens	PAR-CLIP
2019	ENSG00000163064	Homo sapiens	PAR-CLIP
23114	ENSG00000163531	Homo sapiens	HITS-CLIP
23114	ENSG00000163531	Homo sapiens	HITS-CLIP
9861	ENSG00000163636	Homo sapiens	CLASH
9861	ENSG00000163636	Homo sapiens	CLASH
23176	ENSG00000164402	Homo sapiens	PAR-CLIP
23176	ENSG00000164402	Homo sapiens	PAR-CLIP
23176	ENSG00000164402	Homo sapiens	PAR-CLIP
23176	ENSG00000164402	Homo sapiens	PAR-CLIP
23176	ENSG00000164402	Homo sapiens	PAR-CLIP//HITS-CLIP
23176	ENSG00000164402	Homo sapiens	PAR-CLIP
23176	ENSG00000164402	Homo sapiens	HITS-CLIP
23176	ENSG00000164402	Homo sapiens	HITS-CLIP
23176	ENSG00000164402	Homo sapiens	PAR-CLIP
23176	ENSG00000164402	Homo sapiens	PAR-CLIP
23176	ENSG00000164402	Homo sapiens	PAR-CLIP//HITS-CLIP
23176	ENSG00000164402	Homo sapiens	PAR-CLIP//HITS-CLIP
23176	ENSG00000164402	Homo sapiens	PAR-CLIP//HITS-CLIP
23176	ENSG00000164402	Homo sapiens	PAR-CLIP//HITS-CLIP
23176	ENSG00000164402	Homo sapiens	PAR-CLIP//HITS-CLIP
23176	ENSG00000164402	Homo sapiens	PAR-CLIP//HITS-CLIP
23176	ENSG00000164402	Homo sapiens	PAR-CLIP//HITS-CLIP
23176	ENSG00000164402	Homo sapiens	PAR-CLIP//HITS-CLIP
23176	ENSG00000164402	Homo sapiens	PAR-CLIP//HITS-CLIP
23176	ENSG00000164402	Homo sapiens	PAR-CLIP//HITS-CLIP
23176	ENSG00000164402	Homo sapiens	PAR-CLIP//HITS-CLIP
9232	ENSG00000164611	Homo sapiens	CLASH
9232	ENSG00000164611	Homo sapiens	CLASH
83590	ENSG00000164897	Homo sapiens	CLASH
83590	ENSG00000164897	Homo sapiens	CLASH
221937	ENSG00000164916	Homo sapiens	PAR-CLIP
221937	ENSG00000164916	Homo sapiens	PAR-CLIP
7534	ENSG00000164924	Homo sapiens	CLASH
7534	ENSG00000164924	Homo sapiens	CLASH
26050	ENSG00000165300	Homo sapiens	PAR-CLIP
26050	ENSG00000165300	Homo sapiens	PAR-CLIP
221035	ENSG00000165476	Homo sapiens	HITS-CLIP
64324	ENSG00000165671	Homo sapiens	CLASH
64324	ENSG00000165671	Homo sapiens	PAR-CLIP
64324	ENSG00000165671	Homo sapiens	CLASH//PAR-CLIP
64324	ENSG00000165671	Homo sapiens	CLASH//PAR-CLIP
23203	ENSG00000165688	Homo sapiens	CLASH
23203	ENSG00000165688	Homo sapiens	CLASH
9188	ENSG00000165732	Homo sapiens	CLASH
9188	ENSG00000165732	Homo sapiens	CLASH
27343	ENSG00000166169	Homo sapiens	PAR-CLIP
9221	ENSG00000166197	Homo sapiens	CLASH
9221	ENSG00000166197	Homo sapiens	CLASH
4176	ENSG00000166508	Homo sapiens	PAR-CLIP
4176	ENSG00000166508	Homo sapiens	PAR-CLIP
4176	ENSG00000166508	Homo sapiens	PAR-CLIP
4176	ENSG00000166508	Homo sapiens	PAR-CLIP
4176	ENSG00000166508	Homo sapiens	PAR-CLIP
4176	ENSG00000166508	Homo sapiens	PAR-CLIP
5479	ENSG00000166794	Homo sapiens	PAR-CLIP
81605	ENSG00000167118	Homo sapiens	PAR-CLIP
81605	ENSG00000167118	Homo sapiens	PAR-CLIP
56905	ENSG00000167173	Homo sapiens	CLASH
56905	ENSG00000167173	Homo sapiens	CLASH
6786	ENSG00000167323	Homo sapiens	PAR-CLIP
90007	ENSG00000167470	Homo sapiens	PAR-CLIP
149603	ENSG00000168159	Homo sapiens	PAR-CLIP
3008	ENSG00000168298	Homo sapiens	CLASH
3008	ENSG00000168298	Homo sapiens	CLASH
54921	ENSG00000168802	Homo sapiens	PAR-CLIP
54921	ENSG00000168802	Homo sapiens	PAR-CLIP
79155	ENSG00000168884	Homo sapiens	Western blotting//qRT-PCR
90362	ENSG00000169122	Homo sapiens	CLASH
90362	ENSG00000169122	Homo sapiens	CLASH
51068	ENSG00000169251	Homo sapiens	CLASH
51068	ENSG00000169251	Homo sapiens	CLASH
114787	ENSG00000169258	Homo sapiens	PAR-CLIP
114787	ENSG00000169258	Homo sapiens	PAR-CLIP
2705	ENSG00000169562	Homo sapiens	PAR-CLIP
2705	ENSG00000169562	Homo sapiens	PAR-CLIP
5093	ENSG00000169564	Homo sapiens	CLASH
5093	ENSG00000169564	Homo sapiens	CLASH
83985	ENSG00000169682	Homo sapiens	PAR-CLIP
83985	ENSG00000169682	Homo sapiens	PAR-CLIP
6870	ENSG00000169836	Homo sapiens	PAR-CLIP
6870	ENSG00000169836	Homo sapiens	PAR-CLIP
5036	ENSG00000170515	Homo sapiens	CLASH
5036	ENSG00000170515	Homo sapiens	CLASH
5209	ENSG00000170525	Homo sapiens	PAR-CLIP
5209	ENSG00000170525	Homo sapiens	PAR-CLIP
5209	ENSG00000170525	Homo sapiens	PAR-CLIP
5209	ENSG00000170525	Homo sapiens	PAR-CLIP
23204	ENSG00000170540	Homo sapiens	CLASH
23204	ENSG00000170540	Homo sapiens	CLASH
11214	ENSG00000170776	Homo sapiens	CLASH
11214	ENSG00000170776	Homo sapiens	CLASH
11236	ENSG00000170881	Homo sapiens	CLASH
11236	ENSG00000170881	Homo sapiens	CLASH
6203	ENSG00000170889	Homo sapiens	CLASH
6203	ENSG00000170889	Homo sapiens	CLASH
3777	ENSG00000171303	Homo sapiens	PAR-CLIP
3777	ENSG00000171303	Homo sapiens	PAR-CLIP
3777	ENSG00000171303	Homo sapiens	PAR-CLIP
3777	ENSG00000171303	Homo sapiens	PAR-CLIP
5223	ENSG00000171314	Homo sapiens	PAR-CLIP
147179	ENSG00000171475	Homo sapiens	PAR-CLIP
147179	ENSG00000171475	Homo sapiens	PAR-CLIP
22883	ENSG00000171603	Homo sapiens	CLASH
22883	ENSG00000171603	Homo sapiens	CLASH
6241	ENSG00000171848	Homo sapiens	HITS-CLIP
6241	ENSG00000171848	Homo sapiens	HITS-CLIP
1051	ENSG00000172216	Homo sapiens	CLASH
1051	ENSG00000172216	Homo sapiens	PAR-CLIP
1051	ENSG00000172216	Homo sapiens	CLASH
1051	ENSG00000172216	Homo sapiens	CLASH
55970	ENSG00000172380	Homo sapiens	CLASH
55970	ENSG00000172380	Homo sapiens	CLASH
54971	ENSG00000172530	Homo sapiens	PAR-CLIP
54971	ENSG00000172530	Homo sapiens	PAR-CLIP
54971	ENSG00000172530	Homo sapiens	PAR-CLIP
54971	ENSG00000172530	Homo sapiens	PAR-CLIP
54971	ENSG00000172530	Homo sapiens	PAR-CLIP
54971	ENSG00000172530	Homo sapiens	PAR-CLIP
57546	ENSG00000172840	Homo sapiens	PAR-CLIP
57546	ENSG00000172840	Homo sapiens	PAR-CLIP
4973	ENSG00000173391	Homo sapiens	PAR-CLIP
4973	ENSG00000173391	Homo sapiens	PAR-CLIP
1605	ENSG00000173402	Homo sapiens	CLASH
1605	ENSG00000173402	Homo sapiens	CLASH
29903	ENSG00000173581	Homo sapiens	HITS-CLIP
29903	ENSG00000173581	Homo sapiens	HITS-CLIP
9986	ENSG00000173653	Homo sapiens	CLASH
9986	ENSG00000173653	Homo sapiens	CLASH
124857	ENSG00000173714	Homo sapiens	PAR-CLIP
124857	ENSG00000173714	Homo sapiens	PAR-CLIP
6777	ENSG00000173757	Homo sapiens	PAR-CLIP
6777	ENSG00000173757	Homo sapiens	PAR-CLIP
10209	ENSG00000173812	Homo sapiens	PAR-CLIP
10209	ENSG00000173812	Homo sapiens	PAR-CLIP
10209	ENSG00000173812	Homo sapiens	PAR-CLIP
10209	ENSG00000173812	Homo sapiens	PAR-CLIP
10589	ENSG00000175550	Homo sapiens	CLASH
10589	ENSG00000175550	Homo sapiens	CLASH
23399	ENSG00000175826	Homo sapiens	PAR-CLIP
23399	ENSG00000175826	Homo sapiens	PAR-CLIP
340359	ENSG00000175946	Homo sapiens	PAR-CLIP
340359	ENSG00000175946	Homo sapiens	PAR-CLIP
340359	ENSG00000175946	Homo sapiens	HITS-CLIP
340359	ENSG00000175946	Homo sapiens	PAR-CLIP
340359	ENSG00000175946	Homo sapiens	PAR-CLIP
340359	ENSG00000175946	Homo sapiens	PAR-CLIP//HITS-CLIP
340359	ENSG00000175946	Homo sapiens	PAR-CLIP//HITS-CLIP
340359	ENSG00000175946	Homo sapiens	PAR-CLIP//HITS-CLIP
340359	ENSG00000175946	Homo sapiens	PAR-CLIP//HITS-CLIP
340359	ENSG00000175946	Homo sapiens	PAR-CLIP//HITS-CLIP
84823	ENSG00000176619	Homo sapiens	CLASH
84823	ENSG00000176619	Homo sapiens	PAR-CLIP
84823	ENSG00000176619	Homo sapiens	CLASH
84823	ENSG00000176619	Homo sapiens	CLASH
6470	ENSG00000176974	Homo sapiens	PAR-CLIP
6470	ENSG00000176974	Homo sapiens	PAR-CLIP
6470	ENSG00000176974	Homo sapiens	PAR-CLIP
6470	ENSG00000176974	Homo sapiens	PAR-CLIP
6470	ENSG00000176974	Homo sapiens	PAR-CLIP
6470	ENSG00000176974	Homo sapiens	PAR-CLIP
403341	ENSG00000177125	Homo sapiens	CLASH
403341	ENSG00000177125	Homo sapiens	CLASH
8408	ENSG00000177169	Homo sapiens	CLASH
8408	ENSG00000177169	Homo sapiens	CLASH
6666	ENSG00000177732	Homo sapiens	PAR-CLIP
6666	ENSG00000177732	Homo sapiens	PAR-CLIP//luciferasereporterassay//westernblotting//qrt-pcr
6666	ENSG00000177732	Homo sapiens	PAR-CLIP//luciferasereporterassay//westernblotting//qrt-pcr
388951	ENSG00000178021	Homo sapiens	CLASH
388951	ENSG00000178021	Homo sapiens	CLASH
8834	ENSG00000178307	Homo sapiens	HITS-CLIP
8834	ENSG00000178307	Homo sapiens	HITS-CLIP
9852	ENSG00000178567	Homo sapiens	CLASH
9852	ENSG00000178567	Homo sapiens	CLASH
23060	ENSG00000180357	Homo sapiens	PAR-CLIP
23510	ENSG00000180901	Homo sapiens	CLASH
23510	ENSG00000180901	Homo sapiens	CLASH
286077	ENSG00000180921	Homo sapiens	CLASH
286077	ENSG00000180921	Homo sapiens	CLASH
11022	ENSG00000182134	Homo sapiens	CLASH
11022	ENSG00000182134	Homo sapiens	CLASH
338707	ENSG00000182272	Homo sapiens	PAR-CLIP
338707	ENSG00000182272	Homo sapiens	PAR-CLIP
338707	ENSG00000182272	Homo sapiens	PAR-CLIP
338707	ENSG00000182272	Homo sapiens	PAR-CLIP
55666	ENSG00000182446	Homo sapiens	CLASH
55666	ENSG00000182446	Homo sapiens	CLASH
23236	ENSG00000182621	Homo sapiens	CLASH
23236	ENSG00000182621	Homo sapiens	CLASH//luciferasereporterassay//westernblotting//qrt-pcr//microarray
23236	ENSG00000182621	Homo sapiens	CLASH//luciferasereporterassay//westernblotting//qrt-pcr//microarray
2894	ENSG00000182771	Homo sapiens	HITS-CLIP
2894	ENSG00000182771	Homo sapiens	HITS-CLIP
9112	ENSG00000182979	Homo sapiens	HITS-CLIP
9112	ENSG00000182979	Homo sapiens	PAR-CLIP
9112	ENSG00000182979	Homo sapiens	HITS-CLIP
9112	ENSG00000182979	Homo sapiens	HITS-CLIP
430	ENSG00000183734	Homo sapiens	PAR-CLIP
430	ENSG00000183734	Homo sapiens	PAR-CLIP
430	ENSG00000183734	Homo sapiens	PAR-CLIP
430	ENSG00000183734	Homo sapiens	PAR-CLIP
23466	ENSG00000183741	Homo sapiens	PAR-CLIP
23466	ENSG00000183741	Homo sapiens	PAR-CLIP
23466	ENSG00000183741	Homo sapiens	PAR-CLIP
23466	ENSG00000183741	Homo sapiens	PAR-CLIP
387893	ENSG00000183955	Homo sapiens	PAR-CLIP
387893	ENSG00000183955	Homo sapiens	PAR-CLIP
71	ENSG00000184009	Homo sapiens	CLASH
71	ENSG00000184009	Homo sapiens	CLASH
256646	ENSG00000184507	Homo sapiens	CLASH
256646	ENSG00000184507	Homo sapiens	CLASH
10801	ENSG00000184640	Homo sapiens	PAR-CLIP
8349	ENSG00000184678	Homo sapiens	CLASH
8349	ENSG00000184678	Homo sapiens	CLASH
26985	ENSG00000185009	Homo sapiens	CLASH
26985	ENSG00000185009	Homo sapiens	CLASH
729857	ENSG00000185304	Homo sapiens	CLASH
729857	ENSG00000185304	Homo sapiens	CLASH
6667	ENSG00000185591	Homo sapiens	PAR-CLIP
6667	ENSG00000185591	Homo sapiens	PAR-CLIP
677	ENSG00000185650	Homo sapiens	CLASH
677	ENSG00000185650	Homo sapiens	CLASH
7332	ENSG00000185651	Homo sapiens	CLASH
7332	ENSG00000185651	Homo sapiens	CLASH
4771	ENSG00000186575	Homo sapiens	PAR-CLIP
4771	ENSG00000186575	Homo sapiens	PAR-CLIP
5757	ENSG00000187514	Homo sapiens	CLASH
5757	ENSG00000187514	Homo sapiens	CLASH
7100	ENSG00000187554	Homo sapiens	PAR-CLIP
7100	ENSG00000187554	Homo sapiens	PAR-CLIP
81848	ENSG00000187678	Homo sapiens	PAR-CLIP
81848	ENSG00000187678	Homo sapiens	PAR-CLIP
81848	ENSG00000187678	Homo sapiens	PAR-CLIP
81848	ENSG00000187678	Homo sapiens	PAR-CLIP
3006	ENSG00000187837	Homo sapiens	CLASH
3006	ENSG00000187837	Homo sapiens	CLASH
57801	ENSG00000188290	Homo sapiens	CLASH
57801	ENSG00000188290	Homo sapiens	CLASH
388228	ENSG00000188322	Homo sapiens	PAR-CLIP
340719	ENSG00000188613	Homo sapiens	PAR-CLIP
340719	ENSG00000188613	Homo sapiens	PAR-CLIP
23450	ENSG00000189091	Homo sapiens	CLASH
23450	ENSG00000189091	Homo sapiens	PAR-CLIP
23450	ENSG00000189091	Homo sapiens	PAR-CLIP
23450	ENSG00000189091	Homo sapiens	CLASH//PAR-CLIP
23450	ENSG00000189091	Homo sapiens	CLASH//PAR-CLIP
23450	ENSG00000189091	Homo sapiens	CLASH//PAR-CLIP
7259	ENSG00000189241	Homo sapiens	PAR-CLIP
7259	ENSG00000189241	Homo sapiens	PAR-CLIP
203068	ENSG00000196230	Homo sapiens	CLASH
203068	ENSG00000196230	Homo sapiens	CLASH
5478	ENSG00000196262	Homo sapiens	CLASH
5478	ENSG00000196262	Homo sapiens	CLASH
55966	ENSG00000196581	Homo sapiens	HITS-CLIP
55966	ENSG00000196581	Homo sapiens	HITS-CLIP
64771	ENSG00000196821	Homo sapiens	PAR-CLIP
64771	ENSG00000196821	Homo sapiens	PAR-CLIP
79027	ENSG00000197343	Homo sapiens	CLASH
79027	ENSG00000197343	Homo sapiens	CLASH
85236	ENSG00000197903	Homo sapiens	CLASH
85236	ENSG00000197903	Homo sapiens	CLASH
83694	ENSG00000198208	Homo sapiens	PAR-CLIP
6147	ENSG00000198242	Homo sapiens	CLASH
6147	ENSG00000198242	Homo sapiens	CLASH
444	ENSG00000198363	Homo sapiens	PAR-CLIP
444	ENSG00000198363	Homo sapiens	PAR-CLIP
4326	ENSG00000198598	Homo sapiens	PAR-CLIP
4326	ENSG00000198598	Homo sapiens	PAR-CLIP
4194	ENSG00000198625	Homo sapiens	PAR-CLIP
4194	ENSG00000198625	Homo sapiens	PAR-CLIP
124930	ENSG00000198720	Homo sapiens	PAR-CLIP
124930	ENSG00000198720	Homo sapiens	PAR-CLIP
124930	ENSG00000198720	Homo sapiens	PAR-CLIP
124930	ENSG00000198720	Homo sapiens	PAR-CLIP
124930	ENSG00000198720	Homo sapiens	PAR-CLIP
124930	ENSG00000198720	Homo sapiens	PAR-CLIP
4540	ENSG00000198786	Homo sapiens	CLASH
4540	ENSG00000198786	Homo sapiens	CLASH
25829	ENSG00000198792	Homo sapiens	PAR-CLIP
4512	ENSG00000198804	Homo sapiens	CLASH
4512	ENSG00000198804	Homo sapiens	CLASH
4508	ENSG00000198899	Homo sapiens	CLASH
4508	ENSG00000198899	Homo sapiens	CLASH
79065	ENSG00000198925	Homo sapiens	PAR-CLIP
79065	ENSG00000198925	Homo sapiens	PAR-CLIP
79065	ENSG00000198925	Homo sapiens	PAR-CLIP
79065	ENSG00000198925	Homo sapiens	PAR-CLIP
9722	ENSG00000198929	Homo sapiens	CLASH
9722	ENSG00000198929	Homo sapiens	PAR-CLIP
9722	ENSG00000198929	Homo sapiens	CLASH//PAR-CLIP
9722	ENSG00000198929	Homo sapiens	CLASH//PAR-CLIP
440689	ENSG00000203814	Homo sapiens	CLASH
440689	ENSG00000203814	Homo sapiens	CLASH
65979	ENSG00000204138	Homo sapiens	PAR-CLIP
3111	ENSG00000204252	Homo sapiens	PAR-CLIP
3111	ENSG00000204252	Homo sapiens	PAR-CLIP
5089	ENSG00000204304	Homo sapiens	PAR-CLIP
7916	ENSG00000204469	Homo sapiens	CLASH
7916	ENSG00000204469	Homo sapiens	CLASH
390980	ENSG00000204524	Homo sapiens	PAR-CLIP
6992	ENSG00000204619	Homo sapiens	PAR-CLIP
6992	ENSG00000204619	Homo sapiens	PAR-CLIP
57469	ENSG00000204851	Homo sapiens	PAR-CLIP
57469	ENSG00000204851	Homo sapiens	PAR-CLIP
162073	ENSG00000205730	Homo sapiens	HITS-CLIP
162073	ENSG00000205730	Homo sapiens	HITS-CLIP
55652	ENSG00000211584	Homo sapiens	CLASH
55652	ENSG00000211584	Homo sapiens	CLASH
23467	ENSG00000221890	Homo sapiens	PAR-CLIP
414236	ENSG00000222047	Homo sapiens	PAR-CLIP
414236	ENSG00000222047	Homo sapiens	PAR-CLIP
348262	ENSG00000225663	Homo sapiens	PAR-CLIP
348262	ENSG00000225663	Homo sapiens	PAR-CLIP
348262	ENSG00000225663	Homo sapiens	PAR-CLIP
348262	ENSG00000225663	Homo sapiens	PAR-CLIP
441531	ENSG00000226784	Homo sapiens	CLASH
441531	ENSG00000226784	Homo sapiens	PAR-CLIP
441531	ENSG00000226784	Homo sapiens	PAR-CLIP
441531	ENSG00000226784	Homo sapiens	CLASH//PAR-CLIP
441531	ENSG00000226784	Homo sapiens	CLASH//PAR-CLIP
441531	ENSG00000226784	Homo sapiens	CLASH//PAR-CLIP
644591	ENSG00000236334	Homo sapiens	CLASH
644591	ENSG00000236334	Homo sapiens	CLASH
10552	ENSG00000241685	Homo sapiens	CLASH
10552	ENSG00000241685	Homo sapiens	CLASH
128977	ENSG00000242259	Homo sapiens	PAR-CLIP
4831	ENSG00000243678	Homo sapiens	CLASH
4831	ENSG00000243678	Homo sapiens	CLASH
27350	ENSG00000244509	Homo sapiens	PAR-CLIP
654790	ENSG00000248485	Homo sapiens	PAR-CLIP
654790	ENSG00000248485	Homo sapiens	PAR-CLIP
101805492	ENSG00000249395	Homo sapiens	Luciferase reporter assay//Western blotting//Immunofluorescence//qRT-PCR//In situ hybridization
85358	ENSG00000251322	Homo sapiens	PAR-CLIP
143244	ENSG00000253626	Homo sapiens	PAR-CLIP
92312	ENSG00000254726	Homo sapiens	PAR-CLIP
92312	ENSG00000254726	Homo sapiens	PAR-CLIP
105371414	ENSG00000260279	Homo sapiens	Western blotting//RNA-seq//qRT-PCR
10628	ENSG00000265972	Homo sapiens	PAR-CLIP
10628	ENSG00000265972	Homo sapiens	PAR-CLIP
10628	ENSG00000265972	Homo sapiens	PAR-CLIP
10628	ENSG00000265972	Homo sapiens	PAR-CLIP
10628	ENSG00000265972	Homo sapiens	PAR-CLIP
10628	ENSG00000265972	Homo sapiens	PAR-CLIP
9757	ENSG00000272333	Homo sapiens	PAR-CLIP
80111	ENSG00000288547	Homo sapiens	PAR-CLIP
80111	ENSG00000288547	Homo sapiens	PAR-CLIP
84726	ENSG00000288701	Homo sapiens	PAR-CLIP

## Sheet: CommonTargets_Exp_vs_AMICADEPs
ENSEMBL gene ID	Gene name	Description	log2FC	Regulation status
ENSG00000149269	PAK1	Serine/threonine-protein kinase PAK 1	1.78276	UPREGULATED
ENSG00000165476	REEP3	Receptor expression-enhancing protein 3	1.72647	UPREGULATED
ENSG00000105404	RABAC1	Prenylated Rab acceptor protein 1	1.54833	UPREGULATED
ENSG00000164897	TMUB1	Transmembrane and ubiquitin-like domain-containing protein 1	1.48523	UPREGULATED
ENSG00000106266	SNX8	Sorting nexin-8	1.12691	UPREGULATED
ENSG00000131389	SLC6A6	Sodium- and chloride-dependent taurine transporter	1.07715	UPREGULATED
ENSG00000109107	ALDOC	Fructose-bisphosphate aldolase C	0.864389	UPREGULATED
ENSG00000116584	ARHGEF2	Rho guanine nucleotide exchange factor 2	0.812372	UPREGULATED
ENSG00000169682	SPNS1	Protein spinster homolog 1	-0.600723	DOWNREGULATED
ENSG00000070756	PABPC1	Polyadenylate-binding protein 1	-0.638248	DOWNREGULATED
ENSG00000100297	MCM5	DNA replication licensing factor MCM5	-0.701635	DOWNREGULATED
ENSG00000166197	NOLC1	Nucleolar and coiled-body phosphoprotein 1	-0.705227	DOWNREGULATED
ENSG00000169251	NMD3	60S ribosomal export protein NMD3	-0.714905	DOWNREGULATED
ENSG00000166508	MCM7	DNA replication licensing factor MCM7	-0.753248	DOWNREGULATED
ENSG00000161011	SQSTM1	Sequestosome-1	-0.796104	DOWNREGULATED
ENSG00000165732	DDX21	Nucleolar RNA helicase 2	-0.842447	DOWNREGULATED
ENSG00000004478	FKBP4	Peptidyl-prolyl cis-trans isomerase FKBP4	-0.85636	DOWNREGULATED
ENSG00000134590	RTL8C	Retrotransposon Gag-like protein 8C	-1.00552	DOWNREGULATED
ENSG00000171848	RRM2	Ribonucleoside-diphosphate reductase subunit M2	-1.18148	DOWNREGULATED
ENSG00000116649	SRM	Spermidine synthase	-1.54483	DOWNREGULATED
ENSG00000134369	NAV1	Neuron navigator 1	-1.54579	DOWNREGULATED
ENSG00000288701	PRRC2B	Protein PRRC2B	-1.70183	DOWNREGULATED
ENSG00000135821	GLUL	Glutamine synthetase	-1.78108	DOWNREGULATED
ENSG00000139645	ANKRD52	Serine/threonine-protein phosphatase 6 regulatory ankyrin repeat subunit C	-2.10027	DOWNREGULATED			Predicted + Experimental target
ENSG00000149591	TAGLN	Transgelin	-2.39591	DOWNREGULATED
ENSG00000184009	ACTG1	Actin, cytoplasmic 2	-2.51107	DOWNREGULATED
