# Supplementary material for: Proteomic profiling identifies miR-423-5p as a modulator of oncogenic metabolism in HCC
Source: Springer Nature journal article supplement (doi:10.1186/s12967-025-07039-4), 2025-09-24
Supplement: MOESM6 [file 12967_2025_7039_MOESM6_ESM.xlsx]

## Sheet: Sheet1
ENSEMBL gene ID	Gene name	Description	Protein name	UniProt Protein ID	log2FC	Regulation status	Type
ENSG00000278540	ACACA	acetyl-CoA carboxylase alpha	ACACA	Q13085	-0.648086	DOWNREGULATED	CommonTargets_3of4Pred-vs-AMICAProts NOTE: Predicted target identified by 3/4 used prediction tools
ENSG00000166825	ANPEP	alanyl aminopeptidase, membrane	AMPN	P15144	-0.918092	DOWNREGULATED
ENSG00000108821	COL1A1	collagen type I alpha 1 chain	CO1A1	P02452	-1.53869	DOWNREGULATED
ENSG00000004478*	FKBP4	FKBP prolyl isomerase 4	FKBP4	Q02790	-0.85636	DOWNREGULATED
ENSG00000106348	IMPDH1	inosine monophosphate dehydrogenase 1	IMDH1	P20839	-1.55883	DOWNREGULATED
ENSG00000116604	MEF2D	myocyte enhancer factor 2D	MEF2D	Q14814	0.845687	UPREGULATED
ENSG00000205726	ITSN1	intersectin 1	ITSN1	Q15811	-1.19752	DOWNREGULATED
ENSG00000154096	THY1	Thy-1 cell surface antigen	THY1	P04216	-4.84779	DOWNREGULATED
ENSG00000169714	CNBP	CCHC-type zinc finger nucleic acid binding protein	CNBP	P62633	-0.656888	DOWNREGULATED
ENSG00000175866	BAIAP2	BAR/IMD domain containing adaptor protein 2	BAIP2	Q9UQB8	-0.752681	DOWNREGULATED
ENSG00000159217	IGF2BP1	insulin like growth factor 2 mRNA binding protein 1	IF2B1	Q9NZI8	-0.646585	DOWNREGULATED
ENSG00000055147	FAM114A2	family with sequence similarity 114 member A2	F1142	Q9NRY5	-1.29551	DOWNREGULATED
ENSG00000129353	SLC44A2	solute carrier family 44 member 2	CTL2	Q8IWA5	0.839155	UPREGULATED
ENSG00000139645*	ANKRD52	ankyrin repeat domain 52	ANR52	Q8NB46	-2.10027	DOWNREGULATED
ENSG00000162706	CADM3	cell adhesion molecule 3	CADM3	Q8N126	-0.905651	DOWNREGULATED	CommonTargets_4of4Pred-vs-AMICAProts NOTE: Predicted target identified by 4/4 used prediction tools
ENSG00000116871	MAP7D1	MAP7 domain containing 1	MA7D1	Q3KQU3	-1.11028	DOWNREGULATED
ENSG00000064300	NGFR	nerve growth factor receptor	TNR16	P08138	3.01441	UPREGULATED
ENSG00000161202	DVL3	dishevelled segment polarity protein 3	DVL3	Q92997	-1.60861	DOWNREGULATED
ENSG00000134369*	NAV1	neuron navigator 1	NAV1	Q8NEY1	-1.54579	DOWNREGULATED
ENSG00000161960	EIF4A1	eukaryotic translation initiation factor 4A1	IF4A1	P60842	-0.729622	DOWNREGULATED
ENSG00000116649*	SRM	spermidine synthase	SPEE	P19623	-1.54483	DOWNREGULATED
ENSG00000149269	PAK1	Serine/threonine-protein kinase PAK 1	PAK1	Q13153	1.78276	UPREGULATED	CommonTargets_ExperimentalvsAMICAProts NOTE: Known experimental target identified by miRTarBase
ENSG00000165476	REEP3	Receptor expression-enhancing protein 3	REEP3	Q6NUK4	1.72647	UPREGULATED
ENSG00000105404	RABAC1	Prenylated Rab acceptor protein 1	PRAF1	Q9UI14	1.54833	UPREGULATED
ENSG00000164897	TMUB1	Transmembrane and ubiquitin-like domain-containing protein 1	TMUB1	Q9BVT8	1.48523	UPREGULATED
ENSG00000106266	SNX8	Sorting nexin-8	SNX8	Q9Y5X2	1.12691	UPREGULATED
ENSG00000131389	SLC6A6	Sodium- and chloride-dependent taurine transporter	SC6A6	P31641	1.07715	UPREGULATED
ENSG00000109107	ALDOC	Fructose-bisphosphate aldolase C	ALDOC	P09972	0.864389	UPREGULATED
ENSG00000116584	ARHGEF2	Rho guanine nucleotide exchange factor 2	ARHG2	Q92974	0.812372	UPREGULATED
ENSG00000169682	SPNS1	Protein spinster homolog 1	SPNS1	Q9H2V7	-0.600723	DOWNREGULATED
ENSG00000070756	PABPC1	Polyadenylate-binding protein 1	PABP1	P11940	-0.638248	DOWNREGULATED
ENSG00000100297	MCM5	DNA replication licensing factor MCM5	MCM5	P33992	-0.701635	DOWNREGULATED
ENSG00000166197	NOLC1	Nucleolar and coiled-body phosphoprotein 1	NOLC1	Q14978	-0.705227	DOWNREGULATED
ENSG00000169251	NMD3	60S ribosomal export protein NMD3	NMD3	Q96D46	-0.714905	DOWNREGULATED
ENSG00000166508	MCM7	DNA replication licensing factor MCM7	MCM7	P33993	-0.753248	DOWNREGULATED
ENSG00000161011	SQSTM1	Sequestosome-1	SQSTM	Q13501	-0.796104	DOWNREGULATED
ENSG00000165732	DDX21	Nucleolar RNA helicase 2	DDX21	Q9NR30	-0.842447	DOWNREGULATED
ENSG00000004478*	FKBP4	Peptidyl-prolyl cis-trans isomerase FKBP4	FKBP4	Q02790	-0.85636	DOWNREGULATED
ENSG00000134590	RTL8C	Retrotransposon Gag-like protein 8C	RTL8C	A6ZKI3	-1.00552	DOWNREGULATED
ENSG00000171848	RRM2	Ribonucleoside-diphosphate reductase subunit M2	RIR2	P31350	-1.18148	DOWNREGULATED
ENSG00000116649*	SRM	Spermidine synthase	SPEE	P19623	-1.54483	DOWNREGULATED
ENSG00000134369*	NAV1	Neuron navigator 1	NAV1	Q8NEY1	-1.54579	DOWNREGULATED
ENSG00000288701	PRRC2B	Protein PRRC2B	PRC2B	Q5JSZ5	-1.70183	DOWNREGULATED
ENSG00000135821	GLUL	Glutamine synthetase	GLNA	P15104	-1.78108	DOWNREGULATED
ENSG00000139645*	ANKRD52	Serine/threonine-protein phosphatase 6 regulatory ankyrin repeat subunit C	ANR52	Q8NB46	-2.10027	DOWNREGULATED
ENSG00000149591	TAGLN	Transgelin	TAGL	Q01995	-2.39591	DOWNREGULATED
ENSG00000184009	ACTG1	Actin, cytoplasmic 2	ACTG	P63261	-2.51107	DOWNREGULATED
